# Supplementary material for: The Iflaviruses Sacbrood virus and Deformed wing virus evoke different transcriptional responses in the honeybee which may facilitate their horizontal or vertical transmission
Source: PubMed Central journal article supplement (PMC4727977; doi:10.7717/peerj.1591), 2016-01-18
Supplement: peerj-04-1591-s001.pdf [file peerj-04-1591-s001.pdf]

**Table S1. Oligonucleotides used in this study.**

| <b>Primer ID</b> | <b>Sequence (5'-3')</b>       | <b>Description</b>                          | <b>GenBank accession of the target sequence</b> |
|------------------|-------------------------------|---------------------------------------------|-------------------------------------------------|
| 59               | GTTTGTATGAGGTTATACTTCAAGGAG   | Deformed wing virus, 8004-8030, For         | AJ489744                                        |
| 60               | GCCATGCAATCCTTCAGTACCAGC      | Deformed wing virus, 8143-8120, Rev         | AJ489744                                        |
| 498              | GATACAGTGGACTCTTATACC         | Sacbrood virus, 371-391, For                | AF092924                                        |
| 499              | GATTCTTCGTCCACTCTCATCAC       | Sacbrood virus, 481-459, Rev                | AF092924                                        |
| 508              | TCCTACGGGAGGCAGCAGT           | Universal bacterial rRNA primer, For        |                                                 |
| 509              | GGACTACCAGGGTATCTAATCCTGTT    | Universal bacterial rRNA primer, Rev        |                                                 |
| 147              | CAAAAAAACTCGTCATATGTTGCCAACTG | Rp49, GB47740, Apis mellifera, For          | NM_001011587                                    |
| 148              | GCATCATTA AAACTTCCAGTTCCTTG   | Rp49, GB47740, Apis mellifera, Rev          | NM_001011587                                    |
| 500              | CCGACTCGTTTCCGACGAC           | Hymenoptaecin, GB51223, Apis mellifera, For | NM_001011615                                    |
| 501              | CGTCTCCTGTCATTCCATTC          | Hymenoptaecin, GB51223, Apis mellifera, Rev | NM_001011615                                    |
| 502              | GCATTTTGAGAATGAAGAACG         | Defensin 1, GB41428, Apis mellifera, For    | NM_001011616                                    |
| 503              | CAAAC TGAGACAGTTAGCAG         | Defensin 1, GB41428, Apis mellifera, Rev    | NM_001011616                                    |
| 504              | T TACTCCGTTCTGCTACTC          | Serpin, GB48820, Apis mellifera, For        | XM_003251765                                    |
| 505              | GTGTGATTCATTCAAATCACC         | Serpin, GB48820, Apis mellifera, Rev        | XM_003251765                                    |
| 506              | GTCCTCATCACGGATAGAC           | PPAE, GB50013, Apis mellifera, For          | XM_001121888                                    |
| 507              | TAATTTCAACGATGGAGAAGTC        | PPAE, GB50013, Apis mellifera, Rev          | XM_001121888                                    |
