# Supplementary material for: The Iflaviruses Sacbrood virus and Deformed wing virus evoke different transcriptional responses in the honeybee which may facilitate their horizontal or vertical transmission
Source: PubMed Central journal article supplement (PMC4727977; doi:10.7717/peerj.1591), 2016-01-18
Supplement: peerj-04-1591-s002.pdf [file peerj-04-1591-s002.pdf]

Table S2

Differentially expressed genes in the orally infected honeybees ( DESeq, P adj < 0.05 and edgeR, FDR <0.05)

| <b>Contrast 1</b>                            |              |               |             |                         |
|----------------------------------------------|--------------|---------------|-------------|-------------------------|
| <b>High SBV+DWV and high DWV vs. control</b> |              |               |             |                         |
| <b>Gene Label</b>                            | <b>logFC</b> | <b>logCPM</b> | <b>FDR</b>  | <b>Flybase ortholog</b> |
| GB49888                                      | 4.782291949  | 4.920483398   | 0.000839692 | FBgn0000473             |
| GB41806                                      | 2.448766608  | 7.067372554   | 0.036597941 | FBgn0038088             |
| GB50550                                      | 2.368293243  | 7.695759508   | 0.047735983 | 0                       |
| GB48148                                      | 3.178511546  | 7.011996701   | 0.048993407 | FBgn0034140             |

| <b>Contrast 2</b>                            |              |               |             |                         |
|----------------------------------------------|--------------|---------------|-------------|-------------------------|
| <b>High SBV+DWV vs. high DWV and control</b> |              |               |             |                         |
| <b>Gene Label</b>                            | <b>logFC</b> | <b>logCPM</b> | <b>FDR</b>  | <b>Flybase ortholog</b> |
| GB47618                                      | 10.170755    | 6.023045369   | 6.72846E-36 | FBgn0010385             |
| GB50423                                      | 9.917126921  | 9.276559483   | 3.08696E-56 | FBgn0052055             |
| GB42310                                      | 9.851545633  | 2.883747954   | 1.23532E-11 | FBgn0045827             |
| GB48823                                      | 9.764361824  | 8.088295566   | 9.56317E-51 | FBgn0004778             |
| GB50363                                      | 9.53997851   | 2.584894239   | 4.29986E-09 | FBgn0038642             |
| GB41428                                      | 9.20267233   | 8.297256453   | 5.1447E-42  | FBgn0010385             |
| GB47520                                      | 8.994094874  | 3.841783073   | 6.81639E-18 | FBgn0045827             |
| GB41637                                      | 8.722966732  | 6.714678486   | 1.17332E-48 | FBgn0030905             |
| GB40298                                      | 8.683571285  | 1.674812148   | 3.37206E-05 | FBgn0035132             |
| GB51126                                      | 8.590695782  | 1.398736265   | 2.08567E-05 | FBgn0036009             |
| GB54001                                      | 8.590695782  | 1.437538685   | 3.05373E-05 | FBgn0036481             |
| GB45912                                      | 8.431672479  | 10.27712242   | 2.82631E-56 | FBgn0011296             |
| GB51306                                      | 8.321492291  | 5.949462992   | 1.34923E-40 | 0                       |
| GB43112                                      | 8.240072812  | 8.892681415   | 3.32565E-49 | FBgn0028573             |
| GB43007                                      | 8.10503905   | 2.927099397   | 5.16208E-10 | FBgn0030592             |
| GB55435                                      | 7.947090212  | 4.82018636    | 1.37977E-27 | FBgn0020626             |
| GB47475                                      | 7.93608286   | 10.07591896   | 6.86763E-54 | FBgn0011296             |
| GB48146                                      | 7.902433092  | 6.014683365   | 8.66977E-26 | FBgn0038071             |
| GB51223                                      | 7.893658758  | 10.69912764   | 2.20263E-46 | FBgn00114002            |
| GB53798                                      | 7.88464312   | 8.97154533    | 9.53055E-34 | FBgn0032132             |
| GB41097                                      | 7.724340028  | 3.227935183   | 7.43375E-14 | FBgn0051954             |
| GB50121                                      | 7.391396136  | 8.723347799   | 2.20263E-46 | FBgn0029167             |
| GB54238                                      | 7.308477775  | 6.164990774   | 7.06203E-35 | FBgn0053547             |
| GB42623                                      | 7.266808393  | 1.822002775   | 1.12266E-06 | FBgn0026427             |
| GB45954                                      | 7.237958149  | 5.995057293   | 5.57364E-25 | FBgn0053196             |
| GB51583                                      | 7.187887728  | 3.648612078   | 3.31747E-16 | FBgn0036117             |
| GB42626                                      | 7.162694515  | 7.93485195    | 2.11238E-41 | FBgn0005613             |
| GB45910                                      | 6.975388925  | 11.49345499   | 1.67095E-46 | FBgn0011296             |
| GB48833                                      | 6.909072753  | 7.557638029   | 1.83854E-25 | FBgn0004778             |
| GB49890                                      | 6.829178349  | 7.06275395    | 8.49894E-24 | FBgn0033302             |
| GB48134                                      | 6.795703039  | 9.585711333   | 1.53101E-26 | FBgn0001258             |
| GB55515                                      | 6.739522986  | 7.981396027   | 1.16606E-27 | FBgn0036262             |
| GB49219                                      | 6.704990947  | 3.72959709    | 7.74114E-16 | FBgn0031905             |
| GB50477                                      | 6.691507392  | 8.378788984   | 1.20345E-35 | FBgn0263774             |
| GB45909                                      | 6.661537327  | 10.66079939   | 6.90655E-44 | FBgn0011296             |
| GB51174                                      | 6.551602858  | 9.242495221   | 5.86269E-39 | FBgn0033661             |
| GB49385                                      | 6.5145164    | 1.83927412    | 1.03023E-06 | FBgn0051201             |
| GB47318                                      | 6.474279228  | 8.614413862   | 2.12513E-17 | FBgn0032835             |
| GB54908                                      | 6.436678096  | 1.971687895   | 1.53892E-05 | FBgn0263705             |
| GB45906                                      | 6.366562377  | 10.39646993   | 5.25977E-39 | FBgn0011296             |
| GB46223                                      | 6.249636624  | 3.49555269    | 3.50319E-12 | FBgn0034470             |

|         |             |             |             |             |
|---------|-------------|-------------|-------------|-------------|
| GB42797 | 6.201146741 | 7.622719751 | 9.41433E-37 | FBgn0037288 |
| GB54881 | 6.196789672 | 5.409476204 | 2.20484E-25 | FBgn0036829 |
| GB42540 | 6.123355772 | 7.215007867 | 1.28399E-36 | FBgn0037329 |
| GB43924 | 6.083756246 | 9.482472247 | 6.11734E-36 | FBgn0263072 |
| GB41709 | 6.015464    | 7.776472657 | 1.24084E-32 | FBgn0030691 |
| GB41361 | 5.944732329 | 1.846207159 | 1.87225E-05 | FBgn0036575 |
| GB51419 | 5.917372649 | 5.890624885 | 4.56684E-26 | FBgn0035439 |
| GB45907 | 5.804299902 | 9.02004699  | 1.40679E-34 | FBgn0011296 |
| GB40137 | 5.774948624 | 5.383954053 | 8.49894E-24 | FBgn0038595 |
| GB44871 | 5.677074883 | 6.55615111  | 2.01646E-33 | FBgn0038074 |
| GB55203 | 5.662836105 | 5.852273453 | 5.47113E-28 | FBgn0034856 |
| GB54139 | 5.644931574 | 4.836767889 | 2.97583E-21 | FBgn0000299 |
| GB42621 | 5.631536926 | 9.318730577 | 1.15029E-30 | FBgn0016075 |
| GB41636 | 5.615778672 | 5.485473795 | 1.8297E-30  | FBgn0013733 |
| GB51200 | 5.58305334  | 1.502228608 | 7.24634E-05 | FBgn0005658 |
| GB41284 | 5.524559683 | 6.353795394 | 3.21163E-29 | FBgn0050197 |
| GB40227 | 5.485685121 | 3.556384482 | 1.91266E-13 | FBgn0036316 |
| GB49888 | 5.470604474 | 4.754204531 | 6.00427E-17 | FBgn0000473 |
| GB52100 | 5.443112965 | 11.06553446 | 4.33231E-28 | FBgn0000299 |
| GB42425 | 5.438445859 | 1.984160937 | 1.87141E-06 | FBgn0039640 |
| GB53860 | 5.416753202 | 8.653838562 | 2.03827E-26 | FBgn0026575 |
| GB41708 | 5.387940233 | 8.394160271 | 3.509E-28   | FBgn0036597 |
| GB41722 | 5.359018878 | 9.485742499 | 7.02727E-22 | FBgn0033246 |
| GB45713 | 5.331054057 | 3.139890371 | 1.2776E-10  | FBgn0031975 |
| GB41222 | 5.331054057 | 3.103855461 | 5.80359E-11 | FBgn0035132 |
| GB47546 | 5.322187589 | 4.246557067 | 2.49851E-15 | 0           |
| GB42554 | 5.315828519 | 4.735046798 | 6.44542E-21 | FBgn0036191 |
| GB44633 | 5.309607691 | 2.374758102 | 8.22023E-08 | 0           |
| GB48148 | 5.272996012 | 6.950545684 | 4.20548E-25 | FBgn0034140 |
| GB43027 | 5.134496115 | 3.116353181 | 4.40988E-09 | 0           |
| GB49886 | 5.120366188 | 6.335781354 | 6.69832E-25 | FBgn0033302 |
| GB40288 | 5.096753134 | 4.101619891 | 6.68364E-11 | FBgn0033302 |
| GB55029 | 5.043051345 | 5.015171509 | 1.77237E-20 | FBgn0031176 |
| GB45708 | 5.014993323 | 3.414357887 | 1.5615E-10  | FBgn0031975 |
| GB42099 | 5.012639651 | 2.890808596 | 3.26696E-09 | FBgn0027600 |
| GB50880 | 4.97231926  | 3.539218914 | 6.08391E-11 | FBgn0263968 |
| GB43739 | 4.958182667 | 3.107138378 | 1.30308E-09 | FBgn0035779 |
| GB47127 | 4.805141038 | 3.454368611 | 1.78758E-10 | FBgn0261832 |
| GB44168 | 4.790425819 | 4.385518954 | 2.18311E-15 | FBgn0000490 |
| GB49442 | 4.783442833 | 2.716259579 | 2.88056E-07 | FBgn0036237 |
| GB52428 | 4.77382648  | 5.876290038 | 5.48242E-28 | FBgn0037126 |
| GB50481 | 4.701168499 | 3.437593359 | 3.14406E-09 | FBgn0023479 |
| GB44996 | 4.691371024 | 9.759459676 | 2.83094E-19 | FBgn0002564 |
| GB48820 | 4.681074062 | 10.27767152 | 9.67969E-23 | FBgn0028985 |
| GB52919 | 4.652304323 | 7.26697432  | 8.76756E-23 | FBgn0036617 |
| GB43713 | 4.609163142 | 6.19299976  | 7.8597E-27  | FBgn0038037 |
| GB42514 | 4.598304636 | 3.440523895 | 4.0663E-10  | FBgn0037297 |
| GB51218 | 4.590144875 | 4.889556171 | 4.62137E-18 | 0           |
| GB52525 | 4.57176458  | 2.005737992 | 1.89416E-05 | FBgn0032248 |
| GB41706 | 4.564904075 | 4.422508374 | 6.55161E-14 | FBgn0028533 |
| GB49552 | 4.554831469 | 5.511767822 | 1.57232E-15 | FBgn0035501 |
| GB52598 | 4.551840161 | 9.161733943 | 6.96559E-25 | FBgn0032213 |
| GB47270 | 4.529763918 | 3.202008898 | 6.55764E-08 | FBgn0015032 |
| GB48391 | 4.525923025 | 3.086413862 | 1.4715E-06  | FBgn0038135 |
| GB42985 | 4.490660274 | 5.994748913 | 2.5774E-15  | 0           |
| GB40708 | 4.47479715  | 8.46955382  | 2.33336E-23 | FBgn0029507 |

|         |             |             |             |             |
|---------|-------------|-------------|-------------|-------------|
| GB54404 | 4.456233188 | 5.853795011 | 5.31933E-25 | FBgn0051522 |
| GB50124 | 4.451843597 | 3.115013684 | 2.49292E-07 | 0           |
| GB47563 | 4.43920437  | 2.153727506 | 9.5133E-06  | FBgn0035575 |
| GB49993 | 4.423690504 | 7.151554427 | 4.30199E-17 | FBgn0035787 |
| GB51467 | 4.392680345 | 1.598346366 | 0.0002703   | FBgn0034140 |
| GB43208 | 4.353013558 | 8.532927606 | 8.60896E-23 | FBgn0036985 |
| GB54289 | 4.322586371 | 5.883161528 | 1.19679E-22 | FBgn0085407 |
| GB40148 | 4.315825695 | 4.536959532 | 7.18595E-11 | FBgn0032810 |
| GB42900 | 4.31460024  | 10.48182674 | 9.86718E-19 | FBgn0261564 |
| GB50609 | 4.299543038 | 11.13250063 | 4.46098E-21 | FBgn0001219 |
| GB45714 | 4.295096004 | 1.98962032  | 3.11926E-05 | FBgn0031975 |
| GB49825 | 4.293411941 | 1.58636751  | 0.001437484 | FBgn0024150 |
| GB45911 | 4.277710134 | 5.403373554 | 6.94648E-21 | FBgn0011296 |
| GB45913 | 4.238007373 | 11.60389423 | 1.94215E-22 | FBgn0011296 |
| GB56028 | 4.227448218 | 6.726762606 | 4.2535E-22  | FBgn0036665 |
| GB55208 | 4.2172577   | 1.966405313 | 0.000104648 | FBgn0041712 |
| GB52721 | 4.203959748 | 5.138952685 | 1.94414E-15 | FBgn0002576 |
| GB47771 | 4.186805063 | 1.4361291   | 0.001292755 | FBgn0034745 |
| GB49441 | 4.181722366 | 7.696658693 | 2.45299E-20 | FBgn0003450 |
| GB50608 | 4.177410797 | 4.638526795 | 7.87016E-12 | FBgn0033495 |
| GB47805 | 4.172485983 | 4.916074207 | 3.42664E-14 | FBgn0043575 |
| GB46587 | 4.156120361 | 8.461552804 | 5.67019E-18 | FBgn0053998 |
| GB55204 | 4.153173329 | 4.706978229 | 3.43988E-11 | FBgn0039896 |
| GB44146 | 4.144290488 | 3.997160795 | 9.98384E-11 | FBgn0034709 |
| GB42146 | 4.143776571 | 7.554664208 | 1.04197E-13 | FBgn0085446 |
| GB49848 | 4.134979045 | 1.925101533 | 0.00052156  | FBgn0038095 |
| GB44552 | 4.08291145  | 2.713818114 | 0.000969678 | FBgn0005633 |
| GB41283 | 4.076489707 | 6.455600261 | 1.03639E-19 | FBgn0003137 |
| GB48079 | 4.075277377 | 3.029746129 | 1.56536E-05 | FBgn0051954 |
| GB46230 | 4.074295982 | 2.477719565 | 0.000894622 | FBgn0034470 |
| GB54219 | 4.060353219 | 9.450692119 | 4.19452E-19 | FBgn0086708 |
| GB42410 | 4.052773313 | 5.182989959 | 1.13046E-12 | FBgn0034638 |
| GB49440 | 4.052303053 | 5.937498762 | 2.8717E-22  | FBgn0039630 |
| GB46142 | 4.04818933  | 4.547024756 | 1.60657E-11 | FBgn0026144 |
| GB48969 | 4.048154797 | 4.182839201 | 8.91184E-08 | FBgn0025592 |
| GB50526 | 4.042056495 | 5.721377747 | 7.8263E-21  | FBgn0038652 |
| GB55205 | 4.041432879 | 5.945069028 | 5.89925E-19 | FBgn0039896 |
| GB47248 | 3.972307954 | 5.374068287 | 4.59841E-18 | FBgn0031146 |
| GB50116 | 3.971997848 | 4.069842944 | 8.79961E-07 | FBgn0036495 |
| GB52348 | 3.934042576 | 3.694784956 | 6.0767E-09  | FBgn0003162 |
| GB41642 | 3.900223873 | 5.515701119 | 5.53609E-18 | 0           |
| GB50005 | 3.885125181 | 8.242995382 | 7.33676E-16 | FBgn0063923 |
| GB42244 | 3.87760767  | 7.9334127   | 1.73656E-19 | FBgn0043903 |
| GB45797 | 3.870783836 | 3.904473887 | 2.08052E-07 | FBgn0039896 |
| GB42135 | 3.865503137 | 4.349674256 | 9.12916E-12 | FBgn0038201 |
| GB42053 | 3.863856438 | 4.597538307 | 2.05952E-11 | FBgn0031381 |
| GB55452 | 3.848427065 | 8.985308451 | 1.2062E-11  | FBgn0052626 |
| GB46286 | 3.846648648 | 3.634693032 | 6.00324E-08 | FBgn0032144 |
| GB54231 | 3.821795535 | 3.367967977 | 8.75755E-07 | FBgn0024352 |
| GB41418 | 3.811644944 | 4.667921915 | 7.74781E-12 | FBgn0002526 |
| GB55451 | 3.800268975 | 9.547457444 | 1.07262E-14 | FBgn0002526 |
| GB52318 | 3.764868534 | 3.201800934 | 1.87864E-05 | FBgn0031907 |
| GB48020 | 3.763125238 | 3.556038981 | 7.03927E-06 | FBgn0034294 |
| GB49544 | 3.761545146 | 2.203978122 | 0.00017126  | FBgn0051150 |
| GB48903 | 3.759454142 | 4.481071795 | 4.93549E-12 | FBgn0038139 |
| GB47580 | 3.753340666 | 5.253876826 | 2.23514E-15 | FBgn0032817 |

|         |             |             |             |             |
|---------|-------------|-------------|-------------|-------------|
| GB55068 | 3.710589069 | 3.616612597 | 1.28813E-07 | FBgn0085351 |
| GB55211 | 3.6614321   | 3.387139155 | 1.22015E-05 | FBgn0032601 |
| GB45796 | 3.6614321   | 3.34411938  | 2.6497E-06  | FBgn0004034 |
| GB40021 | 3.651577951 | 10.92732312 | 5.34045E-17 | FBgn0036124 |
| GB46774 | 3.645756011 | 9.304639432 | 5.90595E-15 | FBgn0031322 |
| GB53028 | 3.622783286 | 6.307606413 | 6.48192E-19 | FBgn0032116 |
| GB47381 | 3.615821627 | 1.810363988 | 0.000743159 | FBgn0053817 |
| GB54732 | 3.582623332 | 5.054497313 | 8.19435E-13 | FBgn0030309 |
| GB45955 | 3.558645202 | 9.282098341 | 2.7896E-16  | FBgn0260746 |
| GB40136 | 3.547358687 | 3.353781563 | 3.83514E-06 | FBgn0038595 |
| GB51383 | 3.479958282 | 2.619720611 | 0.000315426 | FBgn0033302 |
| GB44203 | 3.473817449 | 3.38273504  | 2.16862E-05 | FBgn0037465 |
| GB43716 | 3.465565706 | 5.308057825 | 7.99251E-14 | FBgn0038037 |
| GB44503 | 3.438312692 | 3.729974251 | 5.21423E-07 | FBgn0085201 |
| GB46640 | 3.429629864 | 3.954126163 | 1.52942E-07 | FBgn0033628 |
| GB54942 | 3.427617748 | 4.938248802 | 2.19301E-11 | FBgn0051720 |
| GB54941 | 3.418836615 | 5.952880729 | 1.46404E-16 | FBgn0051720 |
| GB50883 | 3.412791801 | 5.672687142 | 3.27828E-13 | FBgn0032638 |
| GB55212 | 3.402314018 | 4.583690771 | 5.92347E-07 | FBgn0039896 |
| GB44995 | 3.384738019 | 2.677806985 | 3.40356E-05 | FBgn0051008 |
| GB43362 | 3.365493394 | 5.84155463  | 9.08987E-15 | FBgn0030421 |
| GB55890 | 3.359974425 | 1.928917258 | 0.002782661 | FBgn0034275 |
| GB46013 | 3.357693875 | 6.430152481 | 2.82509E-16 | FBgn0032010 |
| GB42434 | 3.351597754 | 2.938403273 | 0.000655624 | FBgn0034580 |
| GB44634 | 3.326655868 | 5.214218178 | 4.56429E-13 | FBgn0243512 |
| GB53978 | 3.316742099 | 5.454582553 | 1.10761E-10 | FBgn0023479 |
| GB40573 | 3.315897469 | 2.913984084 | 6.76919E-05 | FBgn0261834 |
| GB50761 | 3.308444299 | 3.920689255 | 7.22434E-07 | FBgn0038485 |
| GB43711 | 3.298834832 | 2.081957316 | 0.003050198 | FBgn0038037 |
| GB43728 | 3.292408016 | 5.900124046 | 1.53839E-16 | FBgn0038037 |
| GB48905 | 3.283060103 | 7.751561085 | 9.25247E-12 | FBgn0010226 |
| GB44043 | 3.281043651 | 3.43061253  | 3.00729E-05 | FBgn0028841 |
| GB54983 | 3.2705082   | 3.144147035 | 4.41113E-05 | FBgn0035537 |
| GB49887 | 3.26728581  | 3.316842995 | 1.10361E-05 | FBgn0033304 |
| GB47505 | 3.265340609 | 2.88807366  | 0.00013742  | FBgn0053870 |
| GB49672 | 3.250389048 | 4.343644032 | 4.08618E-09 | FBgn0038842 |
| GB54233 | 3.23554729  | 4.693895699 | 3.22763E-09 | FBgn0030964 |
| GB50550 | 3.230861847 | 7.671943929 | 6.50322E-10 | 0           |
| GB52360 | 3.22841053  | 7.62444488  | 1.91624E-12 | FBgn0034886 |
| GB52631 | 3.223649093 | 5.631205363 | 3.86263E-12 | FBgn0003495 |
| GB45696 | 3.196782716 | 6.691876971 | 6.49189E-13 | FBgn0000567 |
| GB52920 | 3.184190176 | 4.292621035 | 6.80255E-08 | FBgn0036618 |
| GB42829 | 3.179125407 | 8.404264717 | 5.12224E-13 | FBgn0034405 |
| GB45157 | 3.166537226 | 5.060101343 | 2.68837E-11 | FBgn0013753 |
| GB47407 | 3.156560924 | 3.068049287 | 2.5735E-05  | FBgn0013981 |
| GB42217 | 3.135604878 | 3.279168864 | 1.63597E-05 | FBgn0039755 |
| GB48687 | 3.131979843 | 6.351160333 | 1.46574E-14 | FBgn0243514 |
| GB40287 | 3.120434473 | 2.97459632  | 0.000183772 | FBgn0033302 |
| GB48129 | 3.118702903 | 1.891102847 | 0.004845844 | FBgn0029880 |
| GB41202 | 3.111647733 | 5.430286693 | 7.66648E-12 | FBgn0027600 |
| GB47142 | 3.080261435 | 8.838866639 | 2.72716E-12 | FBgn0030608 |
| GB49154 | 3.041473786 | 4.969100136 | 2.55513E-09 | FBgn0040491 |
| GB50906 | 3.041420324 | 5.720374349 | 7.07967E-11 | FBgn0032421 |
| GB41623 | 3.00669171  | 3.442303117 | 0.000333541 | FBgn0035430 |
| GB40967 | 2.985745163 | 5.43215594  | 1.60103E-09 | FBgn0005626 |
| GB47940 | 2.974195044 | 8.953548048 | 6.06087E-12 | FBgn0034096 |

|         |             |             |             |             |
|---------|-------------|-------------|-------------|-------------|
| GB50290 | 2.936958601 | 6.446802267 | 1.57017E-13 | FBgn0033033 |
| GB46438 | 2.925049009 | 5.67508812  | 2.19301E-11 | FBgn0027594 |
| GB45495 | 2.917008714 | 10.18043918 | 1.61318E-09 | FBgn0001233 |
| GB54097 | 2.894879856 | 8.020188106 | 1.25752E-10 | FBgn0011672 |
| GB44004 | 2.870169532 | 4.932291827 | 9.9111E-09  | FBgn0034490 |
| GB55889 | 2.869928777 | 6.059073273 | 6.19553E-13 | FBgn0035049 |
| GB44744 | 2.857066175 | 3.749269055 | 4.96442E-05 | FBgn0036101 |
| GB47939 | 2.856806118 | 4.991338673 | 7.03264E-09 | FBgn0040296 |
| GB45701 | 2.851827767 | 6.032038602 | 2.06696E-12 | FBgn0027930 |
| GB53318 | 2.850988765 | 4.603661267 | 2.05528E-07 | FBgn0001291 |
| GB49147 | 2.843415515 | 3.131188159 | 0.000988885 | FBgn0026565 |
| GB48505 | 2.835204063 | 9.933678992 | 2.46924E-10 | FBgn0026415 |
| GB52829 | 2.824059616 | 10.88200321 | 3.99869E-10 | FBgn0026415 |
| GB51650 | 2.817625306 | 4.531553085 | 1.076E-07   | FBgn0034392 |
| GB52642 | 2.80952298  | 6.715202391 | 1.82742E-10 | FBgn0030251 |
| GB42981 | 2.80617376  | 7.416934196 | 1.07006E-10 | FBgn0040323 |
| GB51671 | 2.803269154 | 6.270001872 | 4.57929E-12 | FBgn0030869 |
| GB53865 | 2.79304581  | 6.306108981 | 3.7489E-12  | FBgn0013984 |
| GB50156 | 2.783530239 | 5.274694612 | 1.00977E-09 | FBgn0039225 |
| GB53353 | 2.773480895 | 2.984395661 | 0.000611533 | FBgn0013984 |
| GB42433 | 2.770112383 | 4.568963085 | 3.11941E-07 | FBgn0261797 |
| GB41806 | 2.75343728  | 7.045997663 | 9.56754E-06 | FBgn0038088 |
| GB54315 | 2.751728706 | 3.270979629 | 0.003393493 | FBgn0034426 |
| GB53209 | 2.737382423 | 3.084312619 | 0.001239318 | FBgn0261565 |
| GB55030 | 2.735025376 | 8.950551586 | 7.68046E-10 | FBgn0046706 |
| GB48194 | 2.719192491 | 4.568835643 | 5.72603E-07 | FBgn0039755 |
| GB48271 | 2.715282471 | 2.255212077 | 0.003508414 | FBgn0000210 |
| GB55590 | 2.703653974 | 8.369812174 | 2.48687E-09 | FBgn0025814 |
| GB45248 | 2.683962215 | 7.425041698 | 6.74725E-10 | FBgn0032180 |
| GB54946 | 2.661195975 | 3.363438116 | 0.000325178 | FBgn0040299 |
| GB53143 | 2.650947545 | 6.431812267 | 2.88881E-11 | FBgn0016122 |
| GB41301 | 2.650123472 | 9.436894087 | 6.2303E-09  | FBgn0000083 |
| GB47279 | 2.629644876 | 3.98792693  | 5.0286E-05  | FBgn0033696 |
| GB48841 | 2.627570078 | 4.350610065 | 1.03217E-05 | FBgn0038819 |
| GB43783 | 2.61574732  | 4.677734154 | 5.44646E-06 | FBgn0032924 |
| GB55301 | 2.590598321 | 7.770589241 | 4.2672E-09  | FBgn0028926 |
| GB54541 | 2.589426975 | 6.682011189 | 1.89127E-09 | FBgn0031973 |
| GB49885 | 2.583715996 | 7.07468414  | 1.13179E-06 | FBgn0033304 |
| GB40141 | 2.577328318 | 8.168262926 | 2.01417E-08 | FBgn0038738 |
| GB48310 | 2.571972309 | 6.167724126 | 3.70719E-10 | FBgn0038412 |
| GB53077 | 2.567560318 | 4.954771456 | 4.62448E-07 | FBgn0039055 |
| GB55930 | 2.557008446 | 3.933140044 | 0.000335251 | FBgn0038072 |
| GB48634 | 2.556268626 | 8.604374314 | 1.53781E-07 | FBgn0035438 |
| GB44005 | 2.555927966 | 6.443953448 | 1.78758E-10 | FBgn0034490 |
| GB47749 | 2.553959482 | 6.593055117 | 7.21289E-10 | FBgn0039419 |
| GB40976 | 2.527773093 | 12.22168755 | 8.23576E-08 | FBgn0001233 |
| GB51345 | 2.524940219 | 8.269098065 | 2.27387E-08 | FBgn0039151 |
| GB43708 | 2.509963639 | 11.88310773 | 1.06539E-06 | FBgn0015221 |
| GB42741 | 2.495765962 | 5.229341692 | 6.23134E-06 | FBgn0050496 |
| GB46984 | 2.490306421 | 6.527970831 | 3.92223E-06 | FBgn0086691 |
| GB47931 | 2.479602137 | 5.373468002 | 6.73041E-07 | FBgn0036316 |
| GB50508 | 2.448247344 | 6.321935869 | 2.4933E-09  | FBgn0243514 |
| GB49347 | 2.445671913 | 6.974296852 | 1.25501E-07 | FBgn0033883 |
| GB50137 | 2.442375079 | 4.988265987 | 1.14632E-05 | FBgn0004378 |
| GB43784 | 2.434424728 | 5.680629812 | 3.19632E-08 | FBgn0035770 |
| GB52191 | 2.432371464 | 7.575076736 | 1.86998E-08 | FBgn0051217 |

|         |             |             |             |             |
|---------|-------------|-------------|-------------|-------------|
| GB51760 | 2.400986674 | 5.906286613 | 3.98397E-08 | FBgn0000406 |
| GB51613 | 2.395385862 | 5.060576299 | 1.30042E-06 | FBgn0263219 |
| GB50226 | 2.395042291 | 11.0095476  | 1.58074E-07 | FBgn0022355 |
| GB44055 | 2.39108735  | 6.266150343 | 1.00517E-08 | FBgn0000250 |
| GB55070 | 2.381619521 | 5.845712641 | 5.43368E-08 | FBgn0027843 |
| GB53141 | 2.379051557 | 4.853082359 | 2.61849E-06 | FBgn0033786 |
| GB45023 | 2.360318626 | 7.44254863  | 2.76315E-07 | FBgn0032783 |
| GB49327 | 2.350297169 | 5.438236563 | 6.77684E-07 | FBgn0039131 |
| GB47723 | 2.347703712 | 4.197632284 | 0.000605    | FBgn0037387 |
| GB40119 | 2.343061688 | 4.570330715 | 1.48093E-05 | FBgn0016013 |
| GB43184 | 2.340147007 | 8.065669203 | 1.34786E-07 | FBgn0030245 |
| GB54949 | 2.329848218 | 5.342586423 | 2.01547E-07 | FBgn0028978 |
| GB47478 | 2.325750831 | 7.952043277 | 8.9471E-08  | FBgn0035438 |
| GB55302 | 2.313869754 | 9.430404939 | 3.9988E-07  | FBgn0033644 |
| GB41736 | 2.309364402 | 3.687827079 | 0.000734672 | FBgn0013988 |
| GB46612 | 2.276565321 | 4.698004041 | 1.71078E-05 | FBgn0033936 |
| GB46601 | 2.272874566 | 3.68173792  | 0.001181447 | FBgn0035583 |
| GB48344 | 2.26880725  | 4.703170319 | 2.09526E-05 | FBgn0025631 |
| GB43330 | 2.268429594 | 8.558057837 | 7.72683E-05 | FBgn0024319 |
| GB49775 | 2.265470376 | 8.901196612 | 1.02244E-06 | FBgn0011296 |
| GB50448 | 2.265266381 | 4.681141923 | 3.47721E-05 | FBgn0039804 |
| GB51724 | 2.263705744 | 3.199663661 | 0.003618781 | FBgn0039768 |
| GB42558 | 2.261601765 | 3.926140768 | 0.000522749 | FBgn0041585 |
| GB47104 | 2.259284642 | 7.837508485 | 2.765E-07   | FBgn0034162 |
| GB52810 | 2.258885461 | 5.730556837 | 6.41411E-08 | FBgn0039896 |
| GB54294 | 2.246653918 | 5.348872664 | 1.87415E-06 | FBgn0035348 |
| GB54947 | 2.246195541 | 4.574890343 | 2.97551E-05 | FBgn0036235 |
| GB45688 | 2.244756654 | 9.002339208 | 2.06568E-07 | FBgn0033883 |
| GB48436 | 2.241271011 | 6.464447299 | 5.36359E-08 | FBgn0002567 |
| GB51043 | 2.217630887 | 4.302890786 | 0.000189701 | FBgn0023535 |
| GB53831 | 2.216895026 | 6.953068566 | 5.9893E-06  | FBgn0033382 |
| GB44167 | 2.202146914 | 4.460528237 | 0.00015309  | FBgn0033240 |
| GB46813 | 2.190053447 | 4.877239421 | 6.89021E-05 | FBgn0010246 |
| GB49614 | 2.179500147 | 5.810367624 | 1.076E-07   | FBgn0250732 |
| GB49849 | 2.177731106 | 3.297536991 | 0.004628208 | 0           |
| GB54367 | 2.176984344 | 4.931865344 | 1.63749E-05 | FBgn0030884 |
| GB55096 | 2.17435104  | 8.821110349 | 1.96169E-06 | FBgn0002719 |
| GB48029 | 2.172383813 | 5.813703102 | 1.28794E-07 | FBgn0032219 |
| GB45875 | 2.172046247 | 4.176304267 | 0.000637027 | FBgn0035132 |
| GB50009 | 2.170435938 | 7.654800752 | 8.05236E-07 | FBgn0040532 |
| GB53549 | 2.162601404 | 4.904334253 | 7.03404E-05 | FBgn0031037 |
| GB45700 | 2.153315036 | 9.491236108 | 1.03023E-06 | FBgn0000533 |
| GB44214 | 2.147672217 | 4.812380225 | 3.98007E-05 | FBgn0014141 |
| GB43573 | 2.139862277 | 7.612954769 | 6.90516E-07 | FBgn0032638 |
| GB55701 | 2.134870981 | 7.791425802 | 0.000131042 | FBgn0036857 |
| GB47382 | 2.12418177  | 4.419590318 | 0.000279698 | FBgn0013981 |
| GB51238 | 2.117315205 | 4.191243175 | 0.000503537 | FBgn0086687 |
| GB43731 | 2.115288048 | 10.90541882 | 7.37893E-05 | FBgn0015222 |
| GB44213 | 2.109788837 | 7.378667895 | 2.67273E-06 | FBgn0014141 |
| GB47107 | 2.094150347 | 7.917916849 | 1.21782E-05 | FBgn0036165 |
| GB54611 | 2.091958655 | 9.552642001 | 1.56536E-05 | FBgn0028984 |
| GB53221 | 2.077836922 | 4.484066296 | 0.000761893 | 0           |
| GB50418 | 2.073289942 | 6.385467929 | 1.67766E-06 | FBgn0262473 |
| GB51741 | 2.070024134 | 7.079613578 | 1.18533E-06 | FBgn0030310 |
| GB45704 | 2.069882014 | 6.129470686 | 3.05325E-07 | FBgn0053229 |
| GB51665 | 2.068204536 | 7.728356844 | 1.50011E-06 | FBgn0032074 |

|         |             |             |             |             |
|---------|-------------|-------------|-------------|-------------|
| GB55007 | 2.067022557 | 3.6535846   | 0.003386016 | FBgn0030051 |
| GB47849 | 2.063211243 | 6.496266772 | 5.57386E-07 | FBgn0038516 |
| GB42084 | 2.057189687 | 6.377104183 | 5.06709E-07 | FBgn0035132 |
| GB40759 | 2.053309136 | 9.337097952 | 3.95436E-06 | FBgn0043841 |
| GB47301 | 2.049912229 | 5.386165275 | 5.7056E-06  | FBgn0034605 |
| GB53847 | 2.039990188 | 6.276315551 | 6.52653E-07 | FBgn0014906 |
| GB46686 | 2.036639496 | 5.022211054 | 7.48405E-05 | FBgn0033913 |
| GB47463 | 2.033472188 | 7.078138157 | 1.74911E-06 | FBgn0001104 |
| GB51551 | 2.022671107 | 7.671332948 | 2.932E-06   | FBgn0035499 |
| GB55016 | 2.015039009 | 9.933898052 | 5.89985E-06 | FBgn0033188 |
| GB42692 | 2.013652664 | 4.80380271  | 0.000115735 | FBgn0003964 |
| GB50421 | 2.011218811 | 10.50730788 | 5.17874E-06 | FBgn0000416 |
| GB40508 | 2.001915744 | 5.195365538 | 0.000637027 | FBgn0034804 |
| GB53550 | 2.001824235 | 6.372861071 | 3.52013E-06 | FBgn0031037 |
| GB54426 | 2.000511613 | 6.326738387 | 3.56609E-05 | FBgn0052512 |
| GB49899 | 1.995698319 | 3.982703139 | 0.002820346 | FBgn0263846 |
| GB47055 | 1.994460668 | 5.671366836 | 2.20774E-05 | FBgn0031307 |
| GB48195 | 1.986678384 | 6.992252208 | 2.82555E-05 | FBgn0086687 |
| GB49688 | 1.981224174 | 8.623063707 | 8.958E-06   | FBgn0004577 |
| GB40758 | 1.980399639 | 8.512288696 | 1.18939E-05 | FBgn0033926 |
| GB52115 | 1.980309692 | 7.762080221 | 1.79369E-05 | FBgn0025456 |
| GB52074 | 1.977598986 | 7.79939581  | 2.77542E-05 | FBgn0004654 |
| GB50043 | 1.967754435 | 6.322874769 | 1.81838E-06 | FBgn0259178 |
| GB53755 | 1.9586701   | 4.962733962 | 0.000444741 | FBgn0029690 |
| GB48626 | 1.94409645  | 6.916313598 | 3.11547E-05 | FBgn0031528 |
| GB44967 | 1.944032405 | 5.316446911 | 0.00016793  | FBgn0042094 |
| GB42865 | 1.93203318  | 5.467417394 | 2.42765E-05 | FBgn0036732 |
| GB45639 | 1.913118164 | 4.054229537 | 0.003177791 | FBgn0005612 |
| GB52341 | 1.909770569 | 6.418208056 | 4.07082E-06 | FBgn0013987 |
| GB55998 | 1.895491263 | 5.910480861 | 5.80105E-06 | FBgn0027538 |
| GB47310 | 1.888525544 | 5.902063344 | 7.73085E-06 | FBgn0030791 |
| GB45052 | 1.887107213 | 7.046687224 | 2.09385E-05 | FBgn0026376 |
| GB47415 | 1.882756265 | 7.103185822 | 1.25152E-05 | FBgn0031538 |
| GB48598 | 1.868605019 | 6.247305621 | 5.14558E-06 | FBgn0011674 |
| GB40565 | 1.856550243 | 5.950684468 | 8.52467E-06 | FBgn0262866 |
| GB45676 | 1.85104137  | 5.399524606 | 7.26114E-05 | FBgn0035617 |
| GB52630 | 1.847100262 | 5.198503513 | 0.000170763 | FBgn0036101 |
| GB50136 | 1.838958992 | 8.329198314 | 5.87687E-05 | FBgn0037007 |
| GB55511 | 1.832432823 | 5.702755414 | 2.81622E-05 | FBgn0031461 |
| GB49774 | 1.829019529 | 5.16437121  | 0.003230288 | 0           |
| GB50603 | 1.817929561 | 4.793047168 | 0.000942341 | FBgn0050410 |
| GB55805 | 1.815738598 | 5.456057752 | 7.03932E-05 | FBgn0050118 |
| GB47880 | 1.81382656  | 8.751282522 | 6.02078E-05 | FBgn0003462 |
| GB52278 | 1.804103423 | 5.346503788 | 0.000164047 | FBgn0014141 |
| GB44344 | 1.798871547 | 6.925380365 | 2.90034E-05 | FBgn0053120 |
| GB41807 | 1.794392883 | 7.904236813 | 4.55183E-05 | FBgn0030740 |
| GB42466 | 1.794225928 | 4.795281554 | 0.001050511 | FBgn0031760 |
| GB44803 | 1.787896784 | 6.198278695 | 0.000233329 | FBgn0035904 |
| GB42306 | 1.787112938 | 5.115028844 | 0.00119512  | FBgn0262526 |
| GB50598 | 1.778903397 | 9.077918968 | 0.001141836 | FBgn0086254 |
| GB43572 | 1.776290018 | 7.947394972 | 4.75311E-05 | FBgn0015575 |
| GB49390 | 1.775817621 | 5.509974442 | 0.000113082 | FBgn0028341 |
| GB52158 | 1.76427617  | 6.33798316  | 7.12438E-05 | FBgn0031975 |
| GB44143 | 1.7640494   | 6.201091229 | 0.000198236 | FBgn0037022 |
| GB42738 | 1.757624977 | 5.718424808 | 4.70763E-05 | FBgn0011204 |
| GB43945 | 1.749540016 | 6.01127428  | 3.23253E-05 | FBgn0061200 |

|         |             |             |             |             |
|---------|-------------|-------------|-------------|-------------|
| GB45497 | 1.748879282 | 6.627743041 | 8.83117E-05 | FBgn0050296 |
| GB54051 | 1.733190904 | 5.680099731 | 0.000456953 | FBgn0263607 |
| GB50010 | 1.732095022 | 4.490274039 | 0.003550301 | FBgn0035575 |
| GB51210 | 1.732065067 | 6.653931141 | 7.95127E-05 | FBgn0039492 |
| GB53401 | 1.731397121 | 6.007178249 | 5.48911E-05 | FBgn0028550 |
| GB45617 | 1.716460693 | 6.538667488 | 8.22459E-05 | FBgn0028343 |
| GB49928 | 1.714399146 | 5.34350604  | 0.000382193 | FBgn0036546 |
| GB45736 | 1.707668895 | 7.365062243 | 0.000127841 | FBgn0016693 |
| GB45135 | 1.703829768 | 6.492162048 | 9.71413E-05 | FBgn0028982 |
| GB49607 | 1.701399834 | 9.601213078 | 0.00015388  | FBgn0032949 |
| GB41388 | 1.699024386 | 6.162047598 | 5.8805E-05  | FBgn0001128 |
| GB42329 | 1.696029891 | 7.040473434 | 0.000104425 | FBgn0262975 |
| GB40603 | 1.69108342  | 5.918997613 | 6.45889E-05 | FBgn0022800 |
| GB42141 | 1.690617026 | 9.347962448 | 0.00021535  | FBgn0035811 |
| GB48052 | 1.686912458 | 5.070727967 | 0.00117727  | FBgn0035542 |
| GB47740 | 1.685754429 | 8.212925967 | 0.000233818 | FBgn0036995 |
| GB47929 | 1.675795353 | 4.827065635 | 0.003082943 | FBgn0025686 |
| GB42057 | 1.652835465 | 4.791608361 | 0.003528856 | FBgn0037121 |
| GB44882 | 1.651434398 | 6.79273323  | 0.000173609 | FBgn0035094 |
| GB41313 | 1.650472941 | 6.845401927 | 0.000263175 | FBgn0036501 |
| GB41735 | 1.649604163 | 7.096156217 | 0.000186952 | FBgn0036565 |
| GB41604 | 1.648294061 | 7.73441778  | 0.0002166   | FBgn0030529 |
| GB41293 | 1.632654415 | 5.82726853  | 0.000381027 | FBgn0014340 |
| GB43409 | 1.626429055 | 5.214179695 | 0.001690623 | FBgn0025679 |
| GB50970 | 1.625084902 | 9.111121882 | 0.000375138 | FBgn0040064 |
| GB43188 | 1.614428774 | 4.796681965 | 0.003617852 | FBgn0034602 |
| GB53805 | 1.612422767 | 6.140282014 | 0.00013832  | FBgn0038098 |
| GB49580 | 1.610888253 | 4.91429606  | 0.00322602  | FBgn0033452 |
| GB45147 | 1.606764281 | 8.549596806 | 0.000586551 | FBgn0031913 |
| GB53412 | 1.605704719 | 7.486474519 | 0.001491592 | FBgn0027571 |
| GB46766 | 1.597559089 | 7.242145718 | 0.00045945  | FBgn0034577 |
| GB40083 | 1.597282859 | 5.691682973 | 0.000416149 | FBgn0032358 |
| GB42184 | 1.595367487 | 5.665690654 | 0.002824039 | FBgn0030603 |
| GB45350 | 1.592045855 | 5.942301023 | 0.000222343 | FBgn0261642 |
| GB41965 | 1.583874534 | 9.580600576 | 0.001922681 | FBgn0031696 |
| GB40866 | 1.559595822 | 12.86510576 | 0.000762282 | FBgn0001219 |
| GB46367 | 1.551260316 | 6.663269001 | 0.002483397 | FBgn0011693 |
| GB55103 | 1.545727132 | 5.228817945 | 0.002299096 | FBgn0039509 |
| GB49657 | 1.538412012 | 6.786207575 | 0.000760922 | FBgn0004606 |
| GB49259 | 1.537988613 | 7.384982562 | 0.003150315 | FBgn0030872 |
| GB55482 | 1.535856988 | 7.021534167 | 0.00068071  | FBgn0010620 |
| GB48883 | 1.526069492 | 5.233017677 | 0.002955789 | FBgn0264652 |
| GB49123 | 1.521792221 | 6.576178192 | 0.000620619 | FBgn0035719 |
| GB46276 | 1.514594721 | 8.102700218 | 0.000836527 | FBgn0033799 |
| GB42500 | 1.514539948 | 6.395734927 | 0.000469527 | FBgn0035976 |
| GB43920 | 1.511856964 | 5.928111097 | 0.000594551 | FBgn0034958 |
| GB50430 | 1.50728161  | 5.264271306 | 0.003038114 | FBgn0263929 |
| GB43560 | 1.506410201 | 6.240900505 | 0.00231805  | FBgn0044050 |
| GB42685 | 1.501618622 | 6.555539575 | 0.000986952 | FBgn0040323 |
| GB54331 | 1.496249135 | 9.859088462 | 0.00120486  | FBgn0013770 |
| GB50149 | 1.495672778 | 6.768759251 | 0.002178129 | FBgn0040827 |
| GB46266 | 1.493541603 | 5.372238209 | 0.002191942 | FBgn0016126 |
| GB48672 | 1.492826389 | 5.447754264 | 0.002437093 | FBgn0037697 |
| GB55440 | 1.483692073 | 6.337767301 | 0.000690424 | FBgn0262468 |
| GB45038 | 1.482910204 | 6.229011495 | 0.00285636  | FBgn0037010 |
| GB40735 | 1.480862391 | 9.444426113 | 0.001835419 | FBgn0000064 |



|         |              |             |             |             |
|---------|--------------|-------------|-------------|-------------|
| GB42940 | 1.478865397  | 7.364357502 | 0.001230415 | FBgn0013305 |
| GB55544 | 1.475737642  | 6.562579203 | 0.001482841 | FBgn0261274 |
| GB44100 | 1.472893177  | 5.92070429  | 0.000543897 | FBgn0013733 |
| GB43831 | 1.468136193  | 6.483055445 | 0.001183882 | FBgn0031069 |
| GB40718 | 1.466913496  | 8.874727046 | 0.002842718 | FBgn0020653 |
| GB47565 | 1.466457419  | 9.043511933 | 0.003693923 | FBgn0023095 |
| GB49826 | 1.462634826  | 6.969007796 | 0.002603275 | FBgn0037612 |
| GB53043 | 1.450585424  | 7.480442075 | 0.003211338 | FBgn0020762 |
| GB42142 | 1.443721822  | 5.657492202 | 0.00206635  | FBgn0001078 |
| GB52702 | 1.443375715  | 7.66100419  | 0.002481717 | FBgn0034909 |
| GB49757 | 1.441503227  | 9.040927204 | 0.002814735 | FBgn0037913 |
| GB42608 | 1.439024111  | 6.106088315 | 0.00114104  | FBgn0264294 |
| GB48853 | 1.418503207  | 7.433255886 | 0.002678004 | FBgn0032456 |
| GB44751 | 1.413933455  | 7.898109424 | 0.003256041 | FBgn0032167 |
| GB47201 | 1.406328732  | 8.34968477  | 0.002566996 | FBgn0004657 |
| GB46537 | 1.400499563  | 6.119676417 | 0.001256338 | FBgn0000477 |
| GB52033 | 1.39945186   | 5.902646511 | 0.002939788 | FBgn0261258 |
| GB40232 | 1.392910364  | 10.32018289 | 0.004444945 | FBgn0040309 |
| GB49240 | 1.392169946  | 7.221970059 | 0.002677557 | FBgn0012036 |
| GB42831 | 1.388429699  | 6.18658234  | 0.001984336 | FBgn0039633 |
| GB40577 | 1.364072433  | 6.250439974 | 0.002272919 | FBgn0040319 |
| GB48812 | 1.363536112  | 7.075185278 | 0.003784355 | FBgn0037718 |
| GB55369 | 1.36273635   | 6.445681611 | 0.004420236 | FBgn0033177 |
| GB40773 | 1.347269385  | 7.295583552 | 0.003784405 | FBgn0030485 |
| GB44081 | 1.343386788  | 6.416317211 | 0.004786957 | FBgn0035674 |
| GB40578 | 1.335367491  | 6.515950853 | 0.003575209 | FBgn0028703 |
| GB50271 | 1.320932101  | 6.804825703 | 0.004211447 | FBgn0035432 |
| GB50680 | 1.312838156  | 6.420464602 | 0.004034301 | FBgn0031662 |
| GB42327 | 1.309950097  | 5.789586696 | 0.003751188 | FBgn0262975 |
| GB53046 | 1.285802499  | 6.152651306 | 0.003648854 | FBgn0031220 |
| GB52793 | 1.285062245  | 5.899444993 | 0.00464346  | FBgn0029896 |
| GB44404 | -1.435116633 | 6.08034992  | 0.004978223 | FBgn0050491 |
| GB41143 | -1.479951869 | 8.033504119 | 0.003871    | FBgn0037001 |
| GB51759 | -1.504213001 | 7.531704003 | 0.004359259 | FBgn0032601 |
| GB49584 | -1.507612003 | 6.941096282 | 0.004440768 | FBgn0086712 |
| GB46282 | -1.507803419 | 6.433774849 | 0.004148398 | FBgn0027587 |
| GB43228 | -1.509140964 | 6.073272886 | 0.004410925 | FBgn0035372 |
| GB47177 | -1.509975403 | 6.57066915  | 0.002676086 | FBgn0037549 |
| GB49845 | -1.51422555  | 9.012603032 | 0.004891313 | FBgn0001311 |
| GB55568 | -1.51683811  | 7.18915877  | 0.004387039 | FBgn0038742 |
| GB40489 | -1.523075033 | 7.891929993 | 0.003575209 | FBgn0019957 |
| GB41908 | -1.527801948 | 7.038100152 | 0.004902616 | FBgn0039936 |
| GB43537 | -1.54100915  | 6.353374504 | 0.004511808 | FBgn0033907 |
| GB41850 | -1.549265131 | 5.943809618 | 0.004912707 | FBgn0029167 |
| GB51481 | -1.558954779 | 7.013584841 | 0.00276635  | FBgn0031464 |
| GB50847 | -1.564904367 | 6.454904838 | 0.002566307 | FBgn0030093 |
| GB51800 | -1.568593981 | 7.923485395 | 0.003073144 | FBgn0015903 |
| GB49533 | -1.578868578 | 6.463272221 | 0.003596178 | FBgn0033109 |
| GB49328 | -1.581508088 | 7.074700725 | 0.002299455 | FBgn0033464 |
| GB48254 | -1.582948705 | 7.827326636 | 0.004619207 | FBgn0003174 |
| GB42959 | -1.585125239 | 5.968648439 | 0.003756183 | FBgn0000183 |
| GB52997 | -1.589121875 | 7.760569684 | 0.002055785 | FBgn0262110 |
| GB46793 | -1.595074695 | 5.864206934 | 0.004919148 | FBgn0050185 |
| GB45153 | -1.604168181 | 7.985594305 | 0.003528292 | FBgn0031771 |
| GB42043 | -1.607088438 | 7.023307342 | 0.002668701 | FBgn0051159 |
| GB42840 | -1.608756882 | 7.633738971 | 0.003617852 | FBgn0032305 |

|         |              |             |             |             |
|---------|--------------|-------------|-------------|-------------|
| GB43611 | -1.60937482  | 6.881550763 | 0.003172085 | FBgn0263705 |
| GB43639 | -1.619500245 | 5.84302092  | 0.004670707 | FBgn0034939 |
| GB50558 | -1.62322435  | 6.204229154 | 0.002449158 | FBgn0036135 |
| GB41366 | -1.629966817 | 6.835006768 | 0.003156038 | FBgn0053196 |
| GB40703 | -1.633600807 | 8.369020779 | 0.0022068   | FBgn0036715 |
| GB45540 | -1.634017284 | 6.600065363 | 0.002220576 | FBgn0000097 |
| GB42661 | -1.6356107   | 5.95914259  | 0.003186785 | FBgn0051759 |
| GB41701 | -1.637098473 | 6.925850936 | 0.00177605  | FBgn0050122 |
| GB55911 | -1.639984779 | 6.798405829 | 0.003478868 | FBgn0026059 |
| GB45372 | -1.644652128 | 6.20465972  | 0.001054891 | FBgn0031821 |
| GB50586 | -1.651395851 | 7.12441562  | 0.002369677 | FBgn0003319 |
| GB49325 | -1.653759466 | 6.074823962 | 0.002970179 | FBgn0011604 |
| GB48981 | -1.655122082 | 7.245374284 | 0.001130791 | FBgn0034517 |
| GB46431 | -1.657838884 | 7.54211533  | 0.001608526 | FBgn0037249 |
| GB41609 | -1.663601982 | 6.207479329 | 0.001831816 | FBgn0030631 |
| GB55808 | -1.664979951 | 7.906526541 | 0.00203265  | FBgn0020306 |
| GB50683 | -1.669109942 | 8.098953794 | 0.001591201 | FBgn0037855 |
| GB53670 | -1.672488383 | 7.272982983 | 0.002639764 | FBgn0034087 |
| GB51768 | -1.674830946 | 7.16312205  | 0.002622195 | FBgn0036333 |
| GB42821 | -1.67552522  | 6.505250682 | 0.003320013 | FBgn0036581 |
| GB47905 | -1.678033174 | 6.151705376 | 0.000942707 | FBgn0033205 |
| GB42557 | -1.678992279 | 6.323872371 | 0.001199027 | FBgn0039203 |
| GB52252 | -1.680262105 | 7.786136919 | 0.001922681 | FBgn0031107 |
| GB43456 | -1.680621802 | 6.248512786 | 0.003013537 | FBgn0034476 |
| GB43114 | -1.695821146 | 5.668816801 | 0.004902616 | FBgn0030508 |
| GB43693 | -1.697251505 | 6.046648404 | 0.001130791 | FBgn0036910 |
| GB55356 | -1.699071876 | 6.953103471 | 0.001608526 | FBgn0029835 |
| GB43123 | -1.704551462 | 9.661071162 | 0.001944427 | FBgn0263132 |
| GB53657 | -1.709732967 | 6.847179474 | 0.00130215  | FBgn0037093 |
| GB49977 | -1.714224357 | 7.384434224 | 0.001336822 | FBgn0039709 |
| GB42484 | -1.717084354 | 7.192292586 | 0.001457984 | FBgn0039640 |
| GB43890 | -1.718786949 | 6.555780355 | 0.001362353 | FBgn0033431 |
| GB43304 | -1.722503006 | 7.07555429  | 0.001239164 | FBgn0037963 |
| GB50870 | -1.725089492 | 5.885049956 | 0.002677979 | FBgn0034001 |
| GB41900 | -1.72616803  | 6.187828529 | 0.002165808 | FBgn0259110 |
| GB46902 | -1.745889037 | 6.087942972 | 0.001050511 | FBgn0035146 |
| GB43143 | -1.746301611 | 6.265427515 | 0.000490246 | FBgn0033495 |
| GB48948 | -1.747970567 | 6.430783145 | 0.000777496 | FBgn0032649 |
| GB51104 | -1.750626544 | 9.222737095 | 0.001313616 | FBgn0028371 |
| GB55944 | -1.755455185 | 5.490991214 | 0.004628208 | FBgn0038323 |
| GB50408 | -1.759670954 | 6.802436359 | 0.001598834 | FBgn0036726 |
| GB50769 | -1.763359175 | 6.263698649 | 0.000773598 | FBgn0000008 |
| GB44799 | -1.764642613 | 6.312157818 | 0.001079143 | FBgn0030060 |
| GB55843 | -1.764951866 | 6.102765411 | 0.000896008 | FBgn0035253 |
| GB53010 | -1.765426052 | 8.257002731 | 0.000745233 | FBgn0037579 |
| GB55274 | -1.767268212 | 7.098787525 | 0.000776066 | FBgn0026374 |
| GB49764 | -1.780353478 | 6.894212698 | 0.000593019 | FBgn0261277 |
| GB40405 | -1.781100853 | 6.979782332 | 0.000986952 | FBgn0003159 |
| GB44683 | -1.784148237 | 7.75489143  | 0.003575209 | FBgn0250838 |
| GB45152 | -1.792452824 | 11.23878128 | 0.000567913 | FBgn0261341 |
| GB50101 | -1.795401907 | 7.437727609 | 0.000404963 | FBgn0039594 |
| GB45111 | -1.797103179 | 5.707993212 | 0.002138404 | FBgn0010772 |
| GB50061 | -1.805285973 | 7.604639016 | 0.00040695  | FBgn0001321 |
| GB49308 | -1.826740009 | 6.852069004 | 0.000974881 | FBgn0085638 |
| GB43613 | -1.836418129 | 6.924455934 | 0.000514174 | FBgn0263705 |
| GB48497 | -1.840972035 | 7.996480281 | 0.000773598 | FBgn0010470 |

|         |              |             |             |             |
|---------|--------------|-------------|-------------|-------------|
| GB46680 | -1.844219151 | 5.633873119 | 0.0022068   | FBgn0031849 |
| GB44187 | -1.845396641 | 5.402865358 | 0.00356123  | FBgn0028387 |
| GB55640 | -1.853660483 | 5.322596931 | 0.003651181 | FBgn0034500 |
| GB55395 | -1.855778751 | 5.51780097  | 0.00322602  | FBgn0029837 |
| GB53716 | -1.856468757 | 6.208810764 | 0.000238984 | FBgn0033887 |
| GB54362 | -1.85815393  | 5.768852616 | 0.000942639 | FBgn0033633 |
| GB48578 | -1.859024455 | 5.236696417 | 0.004186065 | FBgn0011297 |
| GB43953 | -1.868439803 | 6.485635834 | 0.000300404 | FBgn0023094 |
| GB40010 | -1.874804951 | 8.68730327  | 0.00145277  | FBgn0261836 |
| GB45122 | -1.875300304 | 5.462652018 | 0.003870123 | FBgn0029514 |
| GB41290 | -1.87628515  | 6.933215266 | 0.000177706 | FBgn0051224 |
| GB44661 | -1.877217456 | 6.730714963 | 0.001372182 | FBgn0259173 |
| GB41746 | -1.877861347 | 6.366113967 | 0.000301021 | FBgn0011592 |
| GB48454 | -1.883249327 | 8.229173773 | 0.000294432 | FBgn0000108 |
| GB42015 | -1.885932566 | 6.461369934 | 0.000149322 | FBgn0037838 |
| GB48577 | -1.89082913  | 6.741366175 | 0.000471896 | FBgn0001083 |
| GB47451 | -1.902761867 | 5.765191697 | 0.000419864 | FBgn0033633 |
| GB55328 | -1.903671875 | 8.133657854 | 0.000859545 | FBgn0003721 |
| GB43054 | -1.904014235 | 7.486285234 | 0.00068071  | FBgn0261259 |
| GB47199 | -1.910017635 | 6.567081621 | 0.000191263 | FBgn0010222 |
| GB54685 | -1.916288677 | 5.569800555 | 0.00125024  | FBgn0039356 |
| GB53012 | -1.92245026  | 5.726702583 | 0.002137544 | FBgn0010473 |
| GB40808 | -1.926565032 | 7.796380151 | 0.000183624 | FBgn0029688 |
| GB45932 | -1.932011733 | 5.270907898 | 0.003013677 | FBgn0020440 |
| GB47321 | -1.932370193 | 6.380254219 | 0.000621295 | FBgn0039111 |
| GB49095 | -1.932428317 | 6.804095516 | 0.000130116 | FBgn0062413 |
| GB46297 | -1.941686294 | 10.84003592 | 0.001110771 | FBgn0035736 |
| GB51814 | -1.944373311 | 5.27693403  | 0.004766666 | FBgn0001112 |
| GB54893 | -1.964277255 | 6.067445643 | 0.000485309 | FBgn0031251 |
| GB43084 | -1.964312021 | 6.672699447 | 0.000361873 | FBgn0035238 |
| GB40445 | -1.965897096 | 9.711109624 | 0.000169446 | FBgn0031918 |
| GB53933 | -1.970478572 | 6.743403417 | 0.000162056 | FBgn0038799 |
| GB43137 | -1.97754052  | 5.134432911 | 0.004440768 | FBgn0261873 |
| GB41625 | -1.988001882 | 8.819338711 | 0.000116036 | FBgn0035844 |
| GB45484 | -1.991418834 | 6.367994387 | 0.000131576 | FBgn0037447 |
| GB46268 | -1.999138538 | 8.557096153 | 0.000105739 | FBgn0024183 |
| GB41372 | -2.000810456 | 5.993787025 | 0.000187465 | FBgn0038641 |
| GB42653 | -2.007026652 | 7.387963774 | 0.000295221 | FBgn0011288 |
| GB42676 | -2.007204397 | 5.097213141 | 0.003572966 | FBgn0033769 |
| GB54538 | -2.009532565 | 6.26795122  | 0.000721536 | FBgn0262870 |
| GB47349 | -2.010024283 | 6.08776625  | 0.00015309  | FBgn0036298 |
| GB47938 | -2.013120508 | 9.021225895 | 0.00012913  | FBgn0031879 |
| GB52925 | -2.014222579 | 6.297984463 | 0.000130805 | FBgn0086911 |
| GB52955 | -2.018076069 | 6.687215603 | 0.000387246 | FBgn0051559 |
| GB50891 | -2.024718845 | 6.455594963 | 0.000260771 | FBgn0034716 |
| GB40993 | -2.026572893 | 5.718662003 | 0.00114104  | FBgn0038247 |
| GB49283 | -2.027262883 | 6.637279028 | 0.000259612 | FBgn0036398 |
| GB41849 | -2.031234485 | 5.211885794 | 0.001805586 | FBgn0054056 |
| GB42904 | -2.033904694 | 6.51126581  | 0.000119978 | FBgn0262681 |
| GB55275 | -2.035427605 | 7.793256956 | 4.20189E-05 | FBgn0036289 |
| GB54144 | -2.048762239 | 6.19424408  | 0.000869591 | FBgn0259233 |
| GB48813 | -2.050088938 | 6.97158088  | 0.002218299 | FBgn0066365 |
| GB50690 | -2.051247458 | 7.306862421 | 7.06068E-05 | FBgn0261397 |
| GB44426 | -2.053105772 | 6.417219465 | 3.23129E-05 | FBgn0037537 |
| GB50753 | -2.057665259 | 6.23274643  | 4.29031E-05 | FBgn0028474 |
| GB55298 | -2.058701502 | 6.165687666 | 0.000285219 | FBgn0011227 |

|         |              |             |             |             |
|---------|--------------|-------------|-------------|-------------|
| GB51511 | -2.059221179 | 6.090109636 | 8.57862E-05 | FBgn0261261 |
| GB40203 | -2.05955359  | 7.493428116 | 6.89021E-05 | FBgn0051028 |
| GB55241 | -2.059621061 | 6.329637452 | 8.07657E-05 | FBgn0030685 |
| GB50672 | -2.0616846   | 7.653278521 | 0.000202632 | FBgn0086736 |
| GB54347 | -2.072692406 | 6.915967127 | 0.000177706 | FBgn0259734 |
| GB49930 | -2.076573294 | 6.816787905 | 3.37347E-05 | FBgn0028491 |
| GB40263 | -2.078148556 | 7.149232489 | 0.000334937 | 0           |
| GB41731 | -2.083881975 | 5.111582063 | 0.003970057 | FBgn0262636 |
| GB46274 | -2.090137735 | 7.415766588 | 0.000214935 | FBgn0030648 |
| GB55483 | -2.096835322 | 8.669309444 | 0.000848219 | FBgn0005666 |
| GB43602 | -2.103686019 | 5.313082231 | 0.002537846 | FBgn0052082 |
| GB40106 | -2.111861661 | 5.407034279 | 0.000927135 | FBgn0264672 |
| GB49870 | -2.130293806 | 6.772379053 | 0.000121079 | FBgn0036821 |
| GB55615 | -2.131204132 | 8.088312388 | 3.62893E-05 | FBgn0034860 |
| GB46015 | -2.136523012 | 5.183597023 | 0.001608526 | FBgn0033753 |
| GB40671 | -2.144371475 | 5.440457908 | 0.000537956 | FBgn0011592 |
| GB51625 | -2.147025474 | 4.755344486 | 0.004016063 | FBgn0033548 |
| GB43612 | -2.159051903 | 6.173120458 | 2.58882E-05 | FBgn0263705 |
| GB51063 | -2.164673629 | 8.769315111 | 6.49407E-05 | FBgn0051973 |
| GB48576 | -2.165273963 | 6.817066851 | 0.00010569  | FBgn0031879 |
| GB55781 | -2.166944615 | 8.651358578 | 0.000102334 | FBgn0053196 |
| GB50295 | -2.171609603 | 6.662750206 | 3.76602E-05 | FBgn0031879 |
| GB41863 | -2.175228983 | 5.383129375 | 0.000707324 | FBgn0029830 |
| GB43941 | -2.17925856  | 7.027014413 | 6.22058E-05 | FBgn0031195 |
| GB43552 | -2.190733321 | 7.102650441 | 2.0861E-05  | FBgn0035575 |
| GB48837 | -2.192895198 | 8.55770549  | 7.31827E-05 | FBgn0039008 |
| GB42796 | -2.193462586 | 5.902920732 | 0.000227321 | FBgn0250839 |
| GB53651 | -2.197233672 | 4.936070508 | 0.001869505 | FBgn0011676 |
| GB42976 | -2.200521404 | 5.805042271 | 0.000201002 | FBgn0004449 |
| GB46886 | -2.219079637 | 5.152270501 | 0.001301506 | FBgn0010399 |
| GB49106 | -2.223906736 | 8.812143004 | 2.0801E-05  | FBgn0250789 |
| GB47082 | -2.227145827 | 5.230342135 | 0.001000405 | FBgn0030660 |
| GB54643 | -2.239118228 | 7.778633754 | 2.09385E-05 | FBgn0019960 |
| GB41270 | -2.245502944 | 9.641543533 | 2.28907E-05 | FBgn0026077 |
| GB49534 | -2.245707317 | 9.688519996 | 1.02901E-05 | FBgn0027341 |
| GB41203 | -2.250419782 | 10.69920613 | 2.53072E-05 | FBgn0026077 |
| GB50538 | -2.255957478 | 5.2131202   | 0.000568415 | FBgn0263986 |
| GB48062 | -2.264420716 | 5.461757909 | 0.000304572 | FBgn0033702 |
| GB43163 | -2.290536636 | 6.583962133 | 1.00865E-05 | FBgn0027503 |
| GB49726 | -2.296137758 | 6.234704617 | 1.61007E-05 | FBgn0003137 |
| GB54127 | -2.300548546 | 4.740917656 | 0.003715993 | FBgn0003353 |
| GB41670 | -2.312788133 | 6.596842873 | 6.26866E-05 | FBgn0010497 |
| GB49184 | -2.316964861 | 5.406431488 | 0.000351411 | FBgn0032749 |
| GB51722 | -2.31735256  | 7.246132443 | 1.01456E-05 | FBgn0035936 |
| GB54213 | -2.325434805 | 7.31378183  | 1.3437E-05  | FBgn0052000 |
| GB41888 | -2.326407512 | 6.731664573 | 1.4597E-05  | FBgn0036398 |
| GB41861 | -2.330539953 | 6.362874641 | 4.13536E-05 | FBgn0053196 |
| GB41855 | -2.335403914 | 7.014019093 | 9.60886E-06 | FBgn0262867 |
| GB49543 | -2.352298183 | 4.711403871 | 0.003267918 | FBgn0036381 |
| GB45937 | -2.363288676 | 8.054774659 | 8.97915E-06 | FBgn0013765 |
| GB46701 | -2.363609017 | 6.862130469 | 7.04352E-06 | FBgn0051204 |
| GB42884 | -2.365462487 | 4.645775447 | 0.003543166 | FBgn0051146 |
| GB47496 | -2.373978557 | 4.537123082 | 0.003003025 | FBgn0039667 |
| GB47513 | -2.384752357 | 5.288251197 | 0.000308607 | FBgn0000448 |
| GB54390 | -2.387376487 | 6.8096501   | 3.9913E-06  | FBgn0025393 |
| GB50085 | -2.398062943 | 4.453019407 | 0.00322602  | FBgn0052736 |

|         |              |             |             |             |
|---------|--------------|-------------|-------------|-------------|
| GB43198 | -2.405308261 | 8.181419331 | 3.41654E-05 | FBgn0000667 |
| GB42804 | -2.412290036 | 8.167590382 | 3.8548E-06  | FBgn0033192 |
| GB40810 | -2.420627546 | 5.107711999 | 0.000305631 | FBgn0035805 |
| GB42612 | -2.424012301 | 8.923911498 | 9.18433E-06 | FBgn0033603 |
| GB54483 | -2.424414037 | 7.302996295 | 2.35056E-06 | FBgn0035539 |
| GB41862 | -2.4290223   | 5.299566138 | 0.000623884 | FBgn0259680 |
| GB42239 | -2.446251677 | 7.346769532 | 3.67695E-06 | FBgn0034943 |
| GB40393 | -2.449647971 | 6.11608568  | 0.000212859 | FBgn0032211 |
| GB46151 | -2.457515881 | 5.083897286 | 0.001822932 | FBgn0082585 |
| GB54076 | -2.460084437 | 6.597074882 | 2.43332E-05 | FBgn0032785 |
| GB52446 | -2.460084437 | 6.620452862 | 7.29278E-06 | FBgn0020300 |
| GB43231 | -2.462690862 | 7.255186414 | 1.20546E-05 | FBgn0035888 |
| GB52447 | -2.466717231 | 5.166289523 | 0.000338088 | FBgn0036780 |
| GB50564 | -2.467223082 | 6.744375255 | 0.000355185 | FBgn0027527 |
| GB53064 | -2.470496039 | 6.630207368 | 0.000111271 | FBgn0010482 |
| GB46077 | -2.489962243 | 4.942008264 | 0.000455477 | FBgn0030729 |
| GB42823 | -2.497380439 | 5.809093379 | 1.58793E-05 | FBgn0036180 |
| GB45235 | -2.516514871 | 5.023120502 | 0.001380381 | FBgn0052432 |
| GB54313 | -2.519823251 | 6.553733832 | 1.63509E-06 | FBgn0030884 |
| GB50262 | -2.522301391 | 5.060027317 | 0.000464922 | FBgn0034911 |
| GB55912 | -2.543833229 | 7.913060699 | 1.02221E-06 | FBgn0026059 |
| GB43205 | -2.5465465   | 5.783398189 | 1.56813E-05 | FBgn0032598 |
| GB41260 | -2.550089008 | 5.34622232  | 8.99115E-05 | FBgn0259247 |
| GB47869 | -2.551768105 | 4.274362768 | 0.004532756 | FBgn0037448 |
| GB55559 | -2.552186631 | 5.268514695 | 0.000111542 | FBgn0033679 |
| GB49809 | -2.558420029 | 5.092747063 | 0.000366297 | FBgn0040351 |
| GB42487 | -2.558426858 | 7.36126224  | 6.31497E-07 | FBgn0260450 |
| GB44842 | -2.567303986 | 6.927016363 | 6.07468E-07 | FBgn0082582 |
| GB41684 | -2.574894251 | 4.864327268 | 0.000446379 | FBgn0031730 |
| GB46368 | -2.583275456 | 5.4222694   | 4.97999E-05 | FBgn0011693 |
| GB55359 | -2.591859155 | 7.780884024 | 7.07447E-07 | FBgn0036365 |
| GB42296 | -2.611125754 | 5.383170777 | 9.82534E-05 | FBgn0038511 |
| GB46113 | -2.61161121  | 5.698671553 | 5.03671E-06 | FBgn0053143 |
| GB50013 | -2.612339849 | 4.95637901  | 0.001135114 | FBgn0036891 |
| GB50567 | -2.616445288 | 6.607747077 | 8.91525E-07 | FBgn0037416 |
| GB47971 | -2.621352765 | 5.90012264  | 1.27401E-05 | FBgn0033917 |
| GB54136 | -2.626262722 | 5.132019837 | 0.000292539 | FBgn0264272 |
| GB46302 | -2.634273833 | 4.539004743 | 0.00206635  | FBgn0262738 |
| GB53970 | -2.642916359 | 8.45925576  | 2.33861E-07 | FBgn0035574 |
| GB44548 | -2.647240913 | 5.806317071 | 7.20797E-06 | FBgn0001112 |
| GB49785 | -2.647976106 | 4.7651953   | 0.000541705 | FBgn0026438 |
| GB44209 | -2.653256587 | 8.31540558  | 1.05193E-06 | FBgn0037537 |
| GB50866 | -2.657066739 | 7.912451855 | 2.06091E-07 | FBgn0010435 |
| GB50453 | -2.660295722 | 6.217967165 | 1.69142E-07 | FBgn0039805 |
| GB44316 | -2.663140023 | 5.075697706 | 0.000194883 | FBgn0033095 |
| GB51442 | -2.668126495 | 7.03628178  | 1.90558E-06 | FBgn0052036 |
| GB46817 | -2.6689562   | 9.695489554 | 5.66705E-06 | FBgn0053257 |
| GB54743 | -2.673164508 | 6.108392333 | 1.55062E-07 | FBgn0004959 |
| GB47004 | -2.679790479 | 4.975920044 | 0.000236092 | FBgn0031849 |
| GB44560 | -2.680905338 | 5.733198258 | 4.95188E-06 | FBgn0003149 |
| GB46597 | -2.686827929 | 5.774577988 | 1.50898E-06 | FBgn0013953 |
| GB52077 | -2.692883661 | 4.384774228 | 0.002143037 | FBgn0003068 |
| GB55765 | -2.70045578  | 6.617793644 | 1.01844E-06 | FBgn0000442 |
| GB42493 | -2.714055654 | 7.208632821 | 8.19178E-07 | FBgn0028573 |
| GB48234 | -2.723631509 | 4.619637079 | 0.001096737 | FBgn0000464 |
| GB55895 | -2.724907207 | 5.486832184 | 7.61099E-05 | FBgn0040705 |

|         |              |             |             |             |
|---------|--------------|-------------|-------------|-------------|
| GB44223 | -2.747445514 | 7.500518957 | 1.02221E-06 | FBgn0027611 |
| GB51736 | -2.749812668 | 8.361062339 | 1.34388E-06 | FBgn0031957 |
| GB40412 | -2.756695721 | 4.216603737 | 0.002264873 | FBgn0051475 |
| GB40306 | -2.762589594 | 5.884066482 | 1.29431E-06 | FBgn0010435 |
| GB42660 | -2.770963666 | 4.188640345 | 0.004048412 | FBgn0028878 |
| GB43718 | -2.78064191  | 5.832976285 | 8.33388E-07 | FBgn0002938 |
| GB45919 | -2.781508025 | 5.078399862 | 7.77256E-05 | FBgn0259164 |
| GB41196 | -2.786398322 | 7.152018549 | 4.2924E-07  | FBgn0023518 |
| GB53343 | -2.790858333 | 6.735405955 | 4.02045E-07 | FBgn0043903 |
| GB45211 | -2.80221946  | 8.563855767 | 2.31013E-07 | FBgn0010423 |
| GB50648 | -2.817042919 | 5.736952871 | 6.16718E-06 | FBgn0003319 |
| GB40503 | -2.819767324 | 8.584117413 | 2.28428E-08 | FBgn0032350 |
| GB44453 | -2.8244131   | 5.590954429 | 4.28926E-06 | FBgn0032804 |
| GB47512 | -2.829798021 | 5.058632237 | 0.000115358 | FBgn0000448 |
| GB47224 | -2.831435488 | 7.737388559 | 1.53781E-07 | FBgn0000568 |
| GB50590 | -2.841853611 | 5.663255831 | 0.000116669 | FBgn0260228 |
| GB52036 | -2.843034525 | 5.076233248 | 0.000124833 | FBgn0003975 |
| GB44002 | -2.851637671 | 5.981301539 | 7.87276E-07 | FBgn0000299 |
| GB55423 | -2.85372927  | 4.26059643  | 0.002217319 | FBgn0036662 |
| GB52028 | -2.853838765 | 9.045348609 | 1.25823E-07 | FBgn0000556 |
| GB53331 | -2.871251604 | 6.788171027 | 5.11092E-08 | FBgn0039294 |
| GB52002 | -2.875661712 | 5.37194517  | 3.37347E-05 | FBgn0031414 |
| GB47718 | -2.877510434 | 4.517645139 | 0.001079847 | FBgn0023091 |
| GB55664 | -2.884551792 | 5.839043287 | 4.51767E-07 | FBgn0051374 |
| GB46976 | -2.899654135 | 5.860967184 | 9.99709E-05 | FBgn0000451 |
| GB52078 | -2.903125514 | 5.328210216 | 6.03527E-06 | FBgn0003068 |
| GB53894 | -2.904771268 | 4.082843495 | 0.002139034 | FBgn0028474 |
| GB54921 | -2.906221115 | 6.377898963 | 1.0379E-07  | FBgn0037487 |
| GB53319 | -2.909117585 | 7.20432798  | 6.54893E-08 | FBgn0034301 |
| GB54818 | -2.918737371 | 7.339964367 | 1.60045E-07 | FBgn0014863 |
| GB42895 | -2.924308061 | 4.81076442  | 0.000203022 | FBgn0030716 |
| GB41262 | -2.928922414 | 5.692397792 | 1.64638E-06 | FBgn0259247 |
| GB45553 | -2.930500089 | 5.401915835 | 2.35056E-06 | FBgn0034157 |
| GB44647 | -2.942701529 | 6.408564037 | 4.58406E-08 | FBgn0261999 |
| GB44798 | -2.944035185 | 7.680128577 | 2.59929E-08 | FBgn0034797 |
| GB55370 | -2.944797634 | 5.456689319 | 3.9913E-06  | FBgn0025878 |
| GB48858 | -2.952942581 | 7.716955783 | 4.23023E-08 | FBgn0040601 |
| GB41331 | -2.96019617  | 4.149457019 | 0.001223801 | 0           |
| GB47499 | -2.960890588 | 8.024165311 | 1.65138E-08 | FBgn0085384 |
| GB40009 | -2.962955519 | 4.595255805 | 0.000621295 | FBgn0261836 |
| GB45364 | -2.966203206 | 6.77159402  | 5.6714E-08  | FBgn0261509 |
| GB49946 | -2.97448518  | 5.330961417 | 1.53728E-05 | FBgn0011653 |
| GB47838 | -2.977288169 | 8.160989346 | 6.36943E-09 | FBgn0034974 |
| GB40842 | -2.983088631 | 7.159438146 | 1.01591E-08 | FBgn0001112 |
| GB47977 | -2.984499906 | 10.28716856 | 6.13319E-08 | FBgn0086906 |
| GB45149 | -2.987623424 | 6.741960507 | 1.67725E-07 | FBgn0032785 |
| GB53675 | -2.997044089 | 5.217130139 | 1.27857E-05 | FBgn0031999 |
| GB45609 | -3.002757486 | 7.446352992 | 4.2946E-07  | FBgn0033079 |
| GB45771 | -3.004091233 | 6.126703046 | 2.85379E-08 | 0           |
| GB50441 | -3.007522197 | 8.206357011 | 1.7273E-07  | FBgn0038405 |
| GB48709 | -3.029336143 | 6.235823852 | 1.5959E-08  | FBgn0033061 |
| GB55225 | -3.050274859 | 7.395516008 | 3.26131E-09 | FBgn0001083 |
| GB44110 | -3.062997819 | 5.460062717 | 2.59443E-06 | FBgn0086673 |
| GB53163 | -3.068647172 | 4.261587599 | 0.000560927 | FBgn0035113 |
| GB40609 | -3.070365499 | 8.022148038 | 5.2452E-07  | FBgn0039210 |
| GB55216 | -3.080284468 | 5.29907906  | 1.3744E-05  | FBgn0039896 |

|         |              |             |             |             |
|---------|--------------|-------------|-------------|-------------|
| GB41308 | -3.0880186   | 8.974853366 | 9.2582E-08  | FBgn0000046 |
| GB49078 | -3.092711855 | 5.179772468 | 5.22473E-06 | FBgn0052645 |
| GB50000 | -3.106922138 | 8.966622274 | 2.43307E-09 | FBgn0032453 |
| GB53320 | -3.116437382 | 3.890116791 | 0.003433432 | FBgn0013813 |
| GB55547 | -3.117817138 | 7.764171122 | 8.05735E-08 | FBgn0050172 |
| GB41730 | -3.134847515 | 3.820061623 | 0.004454065 | FBgn0262636 |
| GB49273 | -3.134847515 | 3.817117989 | 0.004920776 | FBgn0038837 |
| GB42062 | -3.135899719 | 8.541655853 | 6.61973E-09 | FBgn0039527 |
| GB40446 | -3.138901547 | 6.788096187 | 3.69991E-09 | FBgn0033869 |
| GB47948 | -3.139475851 | 7.059347336 | 1.67725E-07 | FBgn0013988 |
| GB54762 | -3.141712771 | 5.177907872 | 2.09526E-05 | FBgn0033362 |
| GB53345 | -3.16015359  | 8.389079519 | 9.28004E-10 | FBgn0037217 |
| GB43983 | -3.169137589 | 6.549215684 | 1.83522E-09 | FBgn0030617 |
| GB55546 | -3.176688598 | 4.569007955 | 0.000214264 | FBgn0039501 |
| GB44723 | -3.18470417  | 4.528611137 | 0.000347709 | FBgn0259240 |
| GB51355 | -3.18576997  | 5.253485578 | 2.95944E-06 | FBgn0052627 |
| GB54775 | -3.192711714 | 8.794900518 | 1.42893E-09 | FBgn0030027 |
| GB45188 | -3.194837583 | 7.450663075 | 6.2746E-10  | FBgn0031630 |
| GB55986 | -3.199184887 | 4.86781615  | 5.90495E-05 | FBgn0030884 |
| GB48007 | -3.200521696 | 8.11793732  | 6.09218E-09 | FBgn0034412 |
| GB54417 | -3.202720565 | 4.320835236 | 0.000327187 | FBgn0026268 |
| GB47944 | -3.208838584 | 5.768210685 | 7.50557E-07 | FBgn0035410 |
| GB55613 | -3.21085354  | 5.542243463 | 2.46125E-06 | FBgn0030161 |
| GB43500 | -3.219223853 | 3.894184531 | 0.003221013 | FBgn0033196 |
| GB47990 | -3.226114042 | 7.439030435 | 4.32584E-09 | FBgn0004117 |
| GB41616 | -3.241424973 | 5.214408649 | 2.02087E-05 | FBgn0031449 |
| GB42485 | -3.250305102 | 5.449718999 | 6.05955E-07 | FBgn0260450 |
| GB44832 | -3.277585893 | 6.201458722 | 4.32584E-09 | FBgn0038629 |
| GB52025 | -3.283565358 | 8.250327905 | 6.05662E-10 | FBgn0027570 |
| GB50660 | -3.285544255 | 6.380022906 | 8.79727E-10 | FBgn0036995 |
| GB46975 | -3.295837129 | 6.229208791 | 5.49111E-06 | FBgn0002183 |
| GB43276 | -3.306365055 | 5.864226846 | 8.66915E-08 | FBgn0058470 |
| GB49080 | -3.307135242 | 8.429862449 | 4.55729E-10 | FBgn0052645 |
| GB49223 | -3.318268293 | 8.062531375 | 4.4654E-09  | FBgn0259108 |
| GB51828 | -3.340509935 | 5.796489228 | 1.07942E-07 | FBgn0036377 |
| GB44452 | -3.341146411 | 6.972593677 | 3.88804E-09 | FBgn0032803 |
| GB40996 | -3.343645229 | 5.167350349 | 6.64944E-06 | FBgn0260793 |
| GB42892 | -3.360053287 | 5.445552814 | 1.54799E-07 | FBgn0004650 |
| GB55231 | -3.362727816 | 7.026895846 | 3.60433E-10 | FBgn0033602 |
| GB40681 | -3.369921497 | 4.446375402 | 0.000690424 | FBgn0051522 |
| GB40165 | -3.377895894 | 10.61395049 | 6.35898E-09 | FBgn0003065 |
| GB43892 | -3.386589019 | 8.10674224  | 1.31873E-10 | FBgn0032945 |
| GB42427 | -3.392649373 | 8.369421336 | 7.78429E-10 | FBgn0039640 |
| GB45019 | -3.405614869 | 5.793873008 | 2.67718E-06 | FBgn0038894 |
| GB55650 | -3.407578119 | 7.485713807 | 8.14509E-10 | FBgn0011286 |
| GB50236 | -3.415339851 | 6.627190433 | 1.88052E-06 | FBgn0035788 |
| GB41945 | -3.423312384 | 7.449576904 | 6.5458E-10  | FBgn0031097 |
| GB54750 | -3.434675162 | 5.327867112 | 3.62487E-07 | FBgn0259226 |
| GB48258 | -3.453606507 | 4.158483289 | 0.000440289 | FBgn0038151 |
| GB44777 | -3.456165419 | 8.83366404  | 1.47616E-10 | FBgn0032299 |
| GB43465 | -3.478681384 | 6.626072045 | 1.2013E-10  | FBgn0039208 |
| GB49734 | -3.480455745 | 5.368430624 | 3.37244E-06 | FBgn0260386 |
| GB51560 | -3.488765772 | 9.657009042 | 5.03414E-11 | FBgn0034022 |
| GB41723 | -3.489182566 | 8.624337686 | 9.66795E-12 | FBgn0261269 |
| GB47976 | -3.490304265 | 6.257325544 | 6.21425E-10 | FBgn0035308 |
| GB43643 | -3.492740345 | 5.62518911  | 3.52464E-07 | FBgn0016694 |

|         |              |             |             |             |
|---------|--------------|-------------|-------------|-------------|
| GB50041 | -3.493863656 | 3.590999711 | 0.003072201 | FBgn0039749 |
| GB40234 | -3.501853128 | 5.119435235 | 2.09013E-06 | FBgn0037565 |
| GB51089 | -3.506504851 | 4.517836749 | 0.000131576 | FBgn0035917 |
| GB51482 | -3.518340572 | 7.454209367 | 1.5615E-10  | FBgn0085446 |
| GB52186 | -3.524828158 | 5.500188313 | 1.4455E-07  | FBgn0052808 |
| GB42303 | -3.526221411 | 6.32605534  | 8.14509E-10 | FBgn0052816 |
| GB55445 | -3.527625785 | 4.538234747 | 0.000115735 | FBgn0021767 |
| GB47788 | -3.535765675 | 3.599073631 | 0.00322602  | FBgn0261588 |
| GB40008 | -3.537732861 | 7.086212761 | 1.10106E-09 | FBgn0261836 |
| GB55729 | -3.543704723 | 6.913712365 | 6.15344E-11 | FBgn0041712 |
| GB44200 | -3.556268969 | 3.692029785 | 0.00235249  | FBgn0030491 |
| GB55403 | -3.573410129 | 6.97273478  | 8.57038E-11 | FBgn0259994 |
| GB49275 | -3.578498141 | 6.023599863 | 1.20503E-08 | FBgn0038837 |
| GB41306 | -3.581441076 | 8.727126538 | 4.2599E-10  | FBgn0000046 |
| GB50171 | -3.590600916 | 7.254147418 | 2.16852E-10 | FBgn0262717 |
| GB41516 | -3.626381798 | 4.653227169 | 3.35207E-05 | FBgn0004865 |
| GB54393 | -3.627784168 | 6.97393073  | 3.92193E-11 | FBgn0031646 |
| GB41622 | -3.63473211  | 5.190374852 | 0.000520042 | FBgn0035429 |
| GB48003 | -3.647693529 | 5.087773263 | 0.000110869 | FBgn0039214 |
| GB47906 | -3.651221754 | 9.713608684 | 4.28859E-12 | FBgn0033731 |
| GB43691 | -3.656667632 | 6.706868344 | 2.22432E-10 | FBgn0038017 |
| GB51060 | -3.689833811 | 4.311983666 | 0.000209589 | FBgn0035625 |
| GB46705 | -3.69581431  | 8.695253638 | 3.99869E-10 | FBgn0053519 |
| GB51901 | -3.70634341  | 7.050208961 | 3.21652E-11 | FBgn0052645 |
| GB54302 | -3.732136012 | 5.715515736 | 6.89844E-08 | FBgn0038986 |
| GB47037 | -3.750566683 | 7.850303059 | 4.61988E-11 | FBgn0264562 |
| GB41310 | -3.775540295 | 9.672040549 | 2.76496E-12 | FBgn0000046 |
| GB55202 | -3.777292658 | 4.815810538 | 4.87803E-06 | FBgn0041711 |
| GB45938 | -3.784281508 | 5.201447778 | 1.21662E-07 | FBgn0000075 |
| GB42851 | -3.820682823 | 4.366150143 | 0.001984881 | FBgn0085472 |
| GB48125 | -3.822104532 | 7.066660061 | 1.2776E-10  | FBgn0031869 |
| GB42769 | -3.827069378 | 10.67177941 | 2.37064E-13 | FBgn0038405 |
| GB51818 | -3.839844453 | 4.848048444 | 5.33151E-06 | FBgn0030591 |
| GB53579 | -3.840274261 | 5.718178609 | 8.69704E-09 | FBgn0051148 |
| GB46298 | -3.848667181 | 7.265609047 | 1.16967E-09 | FBgn0033728 |
| GB44222 | -3.869843605 | 7.324721881 | 9.39652E-11 | FBgn0039897 |
| GB45853 | -3.875290164 | 4.928561207 | 7.07447E-07 | FBgn0039075 |
| GB42206 | -3.887717452 | 6.956091862 | 1.35838E-10 | FBgn0260856 |
| GB49639 | -3.892123229 | 7.871524556 | 2.40218E-10 | FBgn0039648 |
| GB50570 | -3.893403079 | 6.643672694 | 5.08601E-10 | FBgn0037419 |
| GB55617 | -3.918416017 | 5.949773116 | 2.10275E-11 | FBgn0029836 |
| GB42594 | -3.919834962 | 6.376063289 | 1.89238E-12 | FBgn0036834 |
| GB42599 | -3.922214585 | 4.528058852 | 9.23512E-05 | FBgn0053196 |
| GB52723 | -3.922941887 | 6.654316884 | 2.26318E-11 | FBgn0262647 |
| GB54884 | -3.92833463  | 9.152061925 | 1.35736E-13 | FBgn0053978 |
| GB43052 | -3.949077218 | 9.03295533  | 6.24787E-11 | FBgn0003149 |
| GB46365 | -3.972838844 | 5.005304792 | 3.90487E-06 | FBgn0011693 |
| GB46819 | -4.001179807 | 6.691419298 | 5.18805E-13 | FBgn0051296 |
| GB55604 | -4.03433268  | 4.654431739 | 4.14615E-06 | FBgn0010316 |
| GB50973 | -4.038418871 | 7.314679859 | 4.86517E-11 | FBgn0036044 |
| GB55158 | -4.057499745 | 6.803276276 | 7.87016E-12 | FBgn0027495 |
| GB43029 | -4.06002748  | 8.603408254 | 1.16553E-11 | FBgn0000047 |
| GB53286 | -4.065616165 | 8.461751854 | 1.55214E-13 | FBgn0262111 |
| GB47669 | -4.081909544 | 12.15387274 | 2.33988E-14 | FBgn0015766 |
| GB53420 | -4.114760152 | 4.203122261 | 4.2964E-05  | FBgn0050044 |
| GB41621 | -4.135347834 | 4.21930215  | 4.75798E-05 | FBgn0002440 |



|         |              |             |             |             |
|---------|--------------|-------------|-------------|-------------|
| GB41178 | -4.148911528 | 4.222708227 | 4.99121E-05 | FBgn0038727 |
| GB52992 | -4.15280059  | 8.134628616 | 1.64842E-09 | FBgn0052354 |
| GB40085 | -4.155645852 | 4.165958118 | 0.000119978 | FBgn0029807 |
| GB55598 | -4.164818888 | 8.764367283 | 2.98593E-12 | FBgn0004028 |
| GB42286 | -4.175695654 | 6.31572118  | 5.24798E-13 | FBgn0037122 |
| GB42967 | -4.179331296 | 3.36976743  | 0.001982059 | FBgn0036096 |
| GB55325 | -4.180571303 | 6.881200375 | 1.59015E-11 | FBgn0003721 |
| GB52666 | -4.188765101 | 5.211916641 | 3.75493E-08 | FBgn0053196 |
| GB50170 | -4.19065469  | 8.356791909 | 1.91306E-14 | FBgn0262717 |
| GB46698 | -4.197356626 | 5.445495307 | 6.13319E-08 | FBgn0039862 |
| GB50610 | -4.201613022 | 10.89004997 | 3.18261E-16 | FBgn0050101 |
| GB48167 | -4.203321249 | 7.965755238 | 3.47053E-12 | FBgn0262508 |
| GB41311 | -4.210228114 | 8.7274862   | 5.48318E-13 | FBgn0000045 |
| GB49405 | -4.221314667 | 4.248952609 | 0.000341746 | 0           |
| GB43053 | -4.22655522  | 8.855998964 | 7.97615E-12 | FBgn0003149 |
| GB52824 | -4.246974849 | 6.040284286 | 1.12187E-10 | FBgn0033869 |
| GB46038 | -4.266203903 | 5.224531879 | 2.765E-07   | FBgn0052072 |
| GB48443 | -4.268459841 | 7.651438855 | 1.19437E-14 | FBgn0029922 |
| GB40944 | -4.273288781 | 8.158438294 | 4.21044E-15 | FBgn0034903 |
| GB53197 | -4.273469451 | 3.52245991  | 0.000536906 | FBgn0039633 |
| GB50529 | -4.277964737 | 4.263408988 | 0.000247893 | FBgn0037421 |
| GB45732 | -4.293104834 | 8.473616347 | 1.89623E-15 | FBgn0036486 |
| GB42889 | -4.316439528 | 5.591468436 | 1.10586E-09 | FBgn0039478 |
| GB41495 | -4.335764953 | 5.641055614 | 2.53932E-10 | FBgn0016693 |
| GB41946 | -4.366099845 | 8.804405331 | 7.54701E-16 | FBgn0022770 |
| GB42891 | -4.376297588 | 7.792940077 | 1.03426E-13 | FBgn0024366 |
| GB49646 | -4.389204035 | 7.38213646  | 1.07113E-14 | FBgn0038511 |
| GB50006 | -4.390132778 | 3.481918795 | 0.001729146 | FBgn0039927 |
| GB42673 | -4.400442211 | 7.877163022 | 3.89399E-15 | FBgn0032405 |
| GB43580 | -4.401088499 | 10.39392782 | 9.84937E-17 | FBgn0039126 |
| GB40623 | -4.402090443 | 4.363092048 | 4.82985E-05 | FBgn0013733 |
| GB42469 | -4.436397484 | 5.444309647 | 2.49737E-09 | FBgn0036939 |
| GB40007 | -4.444266991 | 6.501239387 | 2.33716E-12 | FBgn0261836 |
| GB41241 | -4.468035365 | 5.978787972 | 3.66592E-11 | FBgn0033633 |
| GB50450 | -4.473019023 | 10.19739245 | 7.26396E-12 | FBgn0001250 |
| GB46310 | -4.475009393 | 7.660304011 | 1.19943E-14 | FBgn0000551 |
| GB41792 | -4.478651525 | 9.508022055 | 1.33093E-15 | FBgn0040601 |
| GB50062 | -4.488192589 | 5.819426949 | 8.93974E-12 | FBgn0037665 |
| GB42852 | -4.495295242 | 4.440148045 | 3.39046E-05 | FBgn0085472 |
| GB45654 | -4.513891955 | 6.314768053 | 8.26996E-14 | FBgn0025837 |
| GB50766 | -4.527933327 | 7.25744027  | 2.42926E-15 | FBgn0264357 |
| GB47223 | -4.531989613 | 4.534483996 | 3.03161E-06 | FBgn0000568 |
| GB42358 | -4.576485287 | 7.324338886 | 5.87011E-16 | FBgn0087011 |
| GB55396 | -4.58285974  | 7.880538415 | 1.29315E-15 | FBgn0052694 |
| GB48216 | -4.585709871 | 6.384125284 | 4.11426E-15 | FBgn0031692 |
| GB54133 | -4.588746585 | 3.616695946 | 0.000773598 | FBgn0038958 |
| GB41771 | -4.590756884 | 6.382530023 | 3.50568E-14 | FBgn0024897 |
| GB49400 | -4.611551566 | 6.550512455 | 1.8355E-14  | FBgn0262599 |
| GB51698 | -4.619247392 | 13.43425843 | 5.17146E-18 | FBgn0002564 |
| GB53935 | -4.636767069 | 3.9280953   | 0.000118266 | FBgn0011476 |
| GB53516 | -4.648635121 | 8.581974222 | 1.44925E-16 | FBgn0043792 |
| GB55611 | -4.66714878  | 5.280435365 | 3.54085E-08 | FBgn0010399 |
| GB50439 | -4.686885525 | 9.612173279 | 1.12795E-14 | FBgn0039480 |
| GB42704 | -4.695531891 | 7.953213311 | 4.11249E-15 | FBgn0037290 |
| GB42890 | -4.705260875 | 5.812747146 | 8.90179E-06 | FBgn0039027 |
| GB51214 | -4.70749075  | 9.59767265  | 1.49813E-14 | FBgn0004169 |

|         |              |             |             |             |
|---------|--------------|-------------|-------------|-------------|
| GB40607 | -4.716877107 | 5.283312277 | 5.7012E-07  | FBgn0037556 |
| GB48967 | -4.723190852 | 4.67455409  | 2.80468E-06 | FBgn0260006 |
| GB51407 | -4.725236523 | 6.812992005 | 7.27311E-13 | FBgn0050069 |
| GB52179 | -4.758963991 | 3.910908645 | 0.000173123 | FBgn0026314 |
| GB50650 | -4.768549026 | 6.632816403 | 2.26913E-09 | FBgn0033359 |
| GB50574 | -4.785486053 | 5.116036559 | 0.000242544 | FBgn0051561 |
| GB42580 | -4.7864039   | 6.290932829 | 1.05804E-13 | FBgn0261446 |
| GB49270 | -4.79749969  | 3.838695588 | 0.000160575 | FBgn0032402 |
| GB49401 | -4.798272153 | 4.806499112 | 3.11941E-07 | FBgn0030257 |
| GB49979 | -4.80592517  | 3.899016175 | 4.60786E-05 | FBgn0043550 |
| GB53288 | -4.806853762 | 4.876959681 | 2.95944E-06 | FBgn0040211 |
| GB50572 | -4.808740522 | 7.318274697 | 7.75907E-14 | FBgn0040279 |
| GB42596 | -4.811829871 | 7.909046319 | 4.55259E-12 | FBgn0021742 |
| GB40228 | -4.815193774 | 6.144671291 | 4.05199E-15 | 0           |
| GB53986 | -4.822868842 | 5.421556736 | 8.05899E-10 | FBgn0026268 |
| GB48769 | -4.848193235 | 5.399533355 | 1.31568E-08 | FBgn0032362 |
| GB54456 | -4.849877274 | 5.862134241 | 1.56914E-13 | FBgn0032462 |
| GB51787 | -4.851676144 | 9.519302701 | 1.64684E-17 | FBgn0002772 |
| GB49802 | -4.851971991 | 5.808111412 | 4.10874E-11 | FBgn0086906 |
| GB46386 | -4.859307391 | 5.458893665 | 9.68789E-11 | FBgn0050420 |
| GB50636 | -4.889525953 | 9.327619975 | 1.74339E-18 | FBgn0031097 |
| GB41904 | -4.897799451 | 7.01249198  | 9.84937E-17 | FBgn0030884 |
| GB54963 | -4.902039077 | 4.981497759 | 4.98158E-07 | FBgn0039335 |
| GB53119 | -4.904322103 | 10.26874224 | 1.20711E-10 | 0           |
| GB48474 | -4.930525076 | 10.08498913 | 1.60426E-19 | FBgn0035398 |
| GB42533 | -4.957659583 | 6.251845714 | 9.87899E-15 | FBgn0040233 |
| GB54970 | -4.971144321 | 9.313416683 | 2.22138E-13 | FBgn0035089 |
| GB48979 | -4.97429035  | 5.043080181 | 2.77912E-09 | FBgn0037323 |
| GB42909 | -4.987749594 | 6.149874522 | 5.68362E-09 | FBgn0039027 |
| GB52184 | -4.998561045 | 6.427960413 | 1.70971E-12 | 0           |
| GB49795 | -5.003096906 | 7.686428676 | 2.84486E-12 | FBgn0029681 |
| GB52105 | -5.00927124  | 6.488416303 | 1.74734E-10 | FBgn0051807 |
| GB40771 | -5.014283951 | 6.457770548 | 1.21039E-13 | FBgn0033763 |
| GB40240 | -5.018834859 | 10.74927451 | 1.07363E-17 | FBgn0002773 |
| GB54767 | -5.045342038 | 4.115338064 | 1.55188E-05 | FBgn0030947 |
| GB40837 | -5.050501554 | 10.06177316 | 5.6625E-19  | FBgn0037323 |
| GB40299 | -5.07896436  | 5.044131205 | 5.88697E-07 | FBgn0035513 |
| GB43298 | -5.081758766 | 9.451654337 | 1.62563E-16 | FBgn0030539 |
| GB42908 | -5.093982189 | 6.426870599 | 8.73157E-07 | FBgn0039027 |
| GB41015 | -5.101821441 | 11.86330233 | 1.2788E-18  | FBgn0031957 |
| GB53517 | -5.114550818 | 6.683980526 | 1.08222E-15 | FBgn0035935 |
| GB50828 | -5.125223861 | 7.802580055 | 7.36255E-18 | FBgn0261836 |
| GB50612 | -5.127728644 | 5.050657362 | 5.25337E-05 | FBgn0050101 |
| GB40604 | -5.128487422 | 6.484501513 | 1.46788E-07 | FBgn0261526 |
| GB53524 | -5.129949967 | 7.830893429 | 6.81639E-18 | FBgn0043792 |
| GB48066 | -5.192521664 | 6.127479921 | 3.30995E-14 | FBgn0020389 |
| GB51653 | -5.206724426 | 11.47942674 | 2.28381E-16 | FBgn0264695 |
| GB49772 | -5.232534432 | 6.927856205 | 2.40978E-12 | FBgn0029681 |
| GB41383 | -5.234954385 | 5.216126889 | 2.47196E-07 | FBgn0035788 |
| GB47947 | -5.243076319 | 8.052803305 | 4.25507E-16 | FBgn0013988 |
| GB53112 | -5.264269776 | 6.294392883 | 1.49086E-14 | FBgn0034289 |
| GB48161 | -5.27006227  | 9.772815793 | 1.13472E-20 | FBgn0034391 |
| GB45850 | -5.281921471 | 9.730544533 | 3.47895E-16 | FBgn0035636 |
| GB46385 | -5.302159421 | 4.415837825 | 3.18864E-07 | FBgn0003292 |
| GB49268 | -5.303263267 | 5.279873592 | 4.19724E-10 | FBgn0038837 |
| GB48860 | -5.35568434  | 6.287806126 | 1.99221E-13 | FBgn0038819 |

|         |              |             |             |             |
|---------|--------------|-------------|-------------|-------------|
| GB51652 | -5.361528363 | 8.812402068 | 3.33143E-15 | FBgn0264695 |
| GB50827 | -5.436894418 | 8.461822873 | 3.3657E-19  | FBgn0051205 |
| GB42911 | -5.488578251 | 5.845076453 | 1.9828E-06  | FBgn0053299 |
| GB43181 | -5.53104701  | 8.112792763 | 7.96471E-11 | FBgn0037992 |
| GB42702 | -5.538412918 | 10.08391916 | 1.77277E-23 | FBgn0037288 |
| GB42763 | -5.54001719  | 8.094787076 | 2.09105E-19 | FBgn0023388 |
| GB54489 | -5.560863922 | 5.616823128 | 2.54535E-13 | FBgn0052829 |
| GB44561 | -5.562633512 | 6.805217234 | 7.80898E-17 | FBgn0039075 |
| GB45764 | -5.570557783 | 8.259169206 | 5.68382E-21 | FBgn0004117 |
| GB55100 | -5.586526799 | 6.810371491 | 9.35428E-15 | FBgn0003016 |
| GB48107 | -5.590611244 | 7.620552938 | 3.42467E-18 | FBgn0017561 |
| GB42912 | -5.601825696 | 7.880161336 | 9.68068E-14 | FBgn0053196 |
| GB51441 | -5.605015751 | 11.88383665 | 2.58092E-24 | FBgn0019960 |
| GB50563 | -5.63803938  | 4.434380649 | 0.000563174 | FBgn0037413 |
| GB47752 | -5.650168899 | 7.346994788 | 5.59993E-17 | FBgn0001992 |
| GB50562 | -5.666917118 | 8.38010292  | 1.32085E-07 | FBgn0037411 |
| GB49689 | -5.691423371 | 8.400241884 | 7.02747E-22 | FBgn0004577 |
| GB52634 | -5.693582482 | 4.708216619 | 2.92871E-08 | FBgn0040087 |
| GB48861 | -5.693810809 | 7.557611151 | 1.16919E-17 | FBgn0038819 |
| GB46973 | -5.706007278 | 8.480500495 | 1.58576E-21 | FBgn0263038 |
| GB47118 | -5.708045131 | 9.16392099  | 1.2905E-22  | FBgn0038439 |
| GB45860 | -5.752134736 | 7.205251047 | 9.63399E-14 | FBgn0066365 |
| GB53120 | -5.756254626 | 7.227763674 | 1.90962E-17 | FBgn0013733 |
| GB40447 | -5.783002443 | 8.733287709 | 1.56291E-15 | FBgn0033869 |
| GB47126 | -5.790169643 | 4.826038022 | 5.22145E-09 | FBgn0004577 |
| GB47550 | -5.80849882  | 5.715260965 | 4.29337E-12 | FBgn0052537 |
| GB53110 | -5.817095683 | 14.17832188 | 4.88083E-23 | FBgn0034289 |
| GB49021 | -5.821032265 | 10.78099321 | 3.07282E-23 | FBgn0034030 |
| GB48174 | -5.838074585 | 9.823040797 | 1.31328E-20 | FBgn0033158 |
| GB55614 | -5.839095648 | 7.745301277 | 4.46895E-20 | FBgn0011225 |
| GB50613 | -5.858958574 | 11.6433098  | 6.43324E-20 | FBgn0050101 |
| GB54791 | -5.872695383 | 4.947867426 | 6.24293E-10 | FBgn0003089 |
| GB42582 | -5.909735726 | 7.433201852 | 4.8934E-19  | FBgn0035280 |
| GB52052 | -5.913540253 | 8.574834696 | 2.51517E-18 | FBgn0029690 |
| GB48173 | -5.941587183 | 8.444805639 | 3.89013E-20 | FBgn0033158 |
| GB46518 | -5.961228168 | 9.184098924 | 7.31037E-12 | 0           |
| GB50875 | -6.029038816 | 8.011586482 | 1.97119E-18 | FBgn0053126 |
| GB42597 | -6.057635881 | 13.17490254 | 7.8597E-27  | FBgn0032538 |
| GB40624 | -6.08301011  | 9.109670027 | 1.06877E-24 | FBgn0259247 |
| GB46585 | -6.083297796 | 12.88830198 | 1.83854E-25 | FBgn0032538 |
| GB46591 | -6.116275523 | 12.55518039 | 5.39413E-26 | FBgn0032538 |
| GB50442 | -6.12132607  | 6.092354723 | 4.15002E-17 | FBgn0039480 |
| GB50449 | -6.148744464 | 7.975815472 | 1.03639E-19 | 0           |
| GB43769 | -6.175264063 | 7.499174969 | 2.01547E-07 | FBgn0037411 |
| GB40659 | -6.199643489 | 5.227072823 | 2.76826E-11 | FBgn0043043 |
| GB50451 | -6.22039319  | 11.82883866 | 1.40678E-23 | FBgn0053196 |
| GB42888 | -6.267283871 | 10.53464528 | 5.20919E-26 | FBgn0053196 |
| GB49394 | -6.283050227 | 8.820655725 | 3.80631E-24 | FBgn0259247 |
| GB44399 | -6.286359943 | 11.83025295 | 3.71015E-23 | FBgn0050101 |
| GB55612 | -6.334598756 | 8.689104652 | 7.11861E-25 | FBgn0263216 |
| GB45957 | -6.359998109 | 8.661041826 | 1.96961E-22 | FBgn0034157 |
| GB41624 | -6.38691439  | 7.310161333 | 2.15409E-20 | FBgn0035845 |
| GB55599 | -6.505274643 | 6.938965723 | 1.35114E-16 | FBgn0052656 |
| GB46414 | -6.557423614 | 5.354843175 | 7.23412E-07 | 0           |
| GB45763 | -6.55763701  | 7.733775953 | 4.67523E-19 | FBgn0004117 |
| GB53525 | -6.585266639 | 7.045538171 | 3.84459E-19 | FBgn0035641 |

|         |              |             |             |             |
|---------|--------------|-------------|-------------|-------------|
| GB53113 | -6.611990587 | 9.015994339 | 1.54748E-21 | FBgn0040496 |
| GB47946 | -6.715593543 | 5.667965701 | 8.37179E-14 | FBgn0013988 |
| GB52104 | -6.745467257 | 5.707155227 | 1.25413E-13 | FBgn0039479 |
| GB47903 | -6.756355417 | 8.211310569 | 3.74474E-24 | FBgn0036110 |
| GB42910 | -6.833670856 | 6.570412016 | 1.32109E-08 | FBgn0053299 |
| GB48794 | -6.87499506  | 11.81852613 | 1.15029E-30 | FBgn0004034 |
| GB46394 | -6.94435205  | 7.858837353 | 1.06877E-24 | FBgn0035091 |
| GB43877 | -6.956379293 | 6.805400244 | 6.88107E-17 | FBgn0034883 |
| GB46399 | -7.153183032 | 8.993390014 | 3.92573E-24 | FBgn0032256 |
| GB50876 | -7.259560389 | 6.142196603 | 2.33716E-12 | FBgn0053126 |
| GB53776 | -8.099737368 | 2.650528954 | 0.003528047 | FBgn0011592 |
| GB43805 | -8.122375269 | 2.591915423 | 0.003109795 | FBgn0029843 |
| GB47536 | -8.28170344  | 2.726603252 | 0.001567272 | FBgn0038181 |
| GB47129 | -8.369485096 | 2.747114111 | 0.003784405 | FBgn0041711 |
| GB42635 | -8.434248478 | 2.74737882  | 0.004434669 | FBgn0085458 |
| GB53313 | -8.469991324 | 2.82229345  | 0.002165808 | 0           |
| GB46403 | -8.547315013 | 3.061985482 | 0.000545027 | FBgn0036299 |
| GB52635 | -8.555656194 | 2.957106505 | 0.000432216 | FBgn0034071 |
| GB48489 | -8.58039423  | 2.961044376 | 0.000863191 | FBgn0031835 |
| GB48796 | -8.705611    | 3.154815695 | 0.000225734 | FBgn0012344 |
| GB49962 | -8.96556751  | 3.309630302 | 0.000253539 | FBgn0004511 |
| GB49295 | -9.108489444 | 3.453956848 | 4.94432E-05 | FBgn0014859 |
| GB42641 | -9.158634304 | 3.439247605 | 0.00013399  | FBgn0039200 |
| GB53689 | -9.212379985 | 3.588446098 | 2.97551E-05 | FBgn0032707 |
| GB50611 | -9.228120865 | 3.631057141 | 0.000448985 | FBgn0050101 |
| GB43367 | -9.314213679 | 3.452639216 | 0.001072525 | FBgn0053003 |
| GB44199 | -9.367302331 | 3.727243255 | 7.84076E-06 | FBgn0052635 |
| GB54457 | -9.418506553 | 3.798329447 | 6.002E-06   | FBgn0052829 |
| GB47120 | -9.570298806 | 3.927832741 | 8.73157E-07 | FBgn0038880 |
| GB54904 | -9.630762359 | 3.982327738 | 1.19573E-06 | FBgn0032402 |
| GB53285 | -9.715096006 | 4.003488356 | 2.18356E-06 | FBgn0002709 |
| GB52017 | -9.766304748 | 4.041213929 | 1.33065E-06 | FBgn0037552 |
| GB51819 | -9.919579063 | 4.26130191  | 4.68755E-08 | FBgn0030590 |
| GB42581 | -10.44689763 | 4.782268213 | 1.18467E-10 | FBgn0035873 |
| GB46417 | -10.50404493 | 4.65421034  | 1.87871E-06 | FBgn0037662 |
| GB50887 | -10.51905168 | 4.803666443 | 1.97437E-10 | FBgn0029961 |
| GB50577 | -10.59991805 | 4.807480617 | 1.01135E-07 | FBgn0037427 |
| GB47927 | -10.72906377 | 4.933531409 | 1.36655E-09 | 0           |

| <b>Contrast 3</b>                 |              |               |             |                         |
|-----------------------------------|--------------|---------------|-------------|-------------------------|
| <b>High DWV alone vs. control</b> |              |               |             |                         |
| <b>Gene Label</b>                 | <b>logFC</b> | <b>logCPM</b> | <b>FDR</b>  | <b>Flybase ortholog</b> |
| GB40949                           | 1.973596654  | 5.250360424   | 0.009903999 | FBgn0039633             |
| GB51046                           | 1.925530595  | 8.159162805   | 0.0143602   | FBgn0030306             |
| GB47822                           | 1.923396465  | 5.627661861   | 0.009870622 | FBgn0034726             |
| GB52690                           | 1.887696469  | 5.184948937   | 0.018431057 | FBgn0033100             |
| GB54882                           | 1.876488975  | 4.943596619   | 0.031832385 | FBgn0030611             |
| GB40653                           | 1.862193524  | 10.34275892   | 0.019369986 | FBgn0032518             |
| GB48780                           | 1.860627521  | 5.52461989    | 0.009870622 | FBgn0052022             |
| GB45554                           | 1.854606     | 5.40760147    | 0.018527416 | FBgn0000173             |
| GB50601                           | 1.843917143  | 8.533089762   | 0.019369986 | FBgn0038224             |
| GB46222                           | 1.841750325  | 9.680706742   | 0.046834472 | FBgn0034470             |
| GB48338                           | 1.822932651  | 5.024331604   | 0.037028055 | FBgn0030480             |
| GB41806                           | 1.814293129  | 5.553014369   | 0.029882617 | FBgn0038088             |

|         |             |             |             |             |
|---------|-------------|-------------|-------------|-------------|
| GB41161 | 1.773367682 | 4.977949489 | 0.046834472 | FBgn0086447 |
| GB46785 | 1.768406753 | 5.787025573 | 0.010106983 | FBgn0037378 |
| GB54555 | 1.765057288 | 6.651431725 | 0.009870622 | FBgn0039868 |
| GB54462 | 1.76374221  | 6.226457157 | 0.008176697 | FBgn0035541 |
| GB40862 | 1.7621768   | 6.040998751 | 0.009870622 | FBgn0033085 |
| GB50724 | 1.760680425 | 4.988613432 | 0.037528353 | FBgn0026566 |
| GB40892 | 1.759749647 | 6.250081989 | 0.009870622 | FBgn0260401 |
| GB40492 | 1.756850908 | 9.480902251 | 0.034644314 | FBgn0030616 |
| GB52470 | 1.754113283 | 5.892640513 | 0.009870622 | FBgn0050105 |
| GB55895 | 1.749968806 | 6.013105282 | 0.009903999 | FBgn0040705 |
| GB54280 | 1.748802913 | 5.681438483 | 0.013099305 | FBgn0036277 |
| GB54970 | 1.745402987 | 10.01706966 | 0.037971201 | FBgn0035089 |
| GB45629 | 1.741709922 | 8.750642528 | 0.031696781 | FBgn0031228 |
| GB45443 | 1.737105022 | 5.904061673 | 0.009870622 | FBgn0037469 |
| GB48916 | 1.734332239 | 5.985575224 | 0.014562109 | FBgn0034744 |
| GB53957 | 1.729746447 | 5.424252936 | 0.031061547 | FBgn0261067 |
| GB42821 | 1.728499769 | 6.963597321 | 0.009903999 | FBgn0036581 |
| GB53539 | 1.727642033 | 6.084759337 | 0.009870622 | FBgn0039764 |
| GB54652 | 1.724237644 | 7.134927148 | 0.018431057 | FBgn0039765 |
| GB46748 | 1.724056554 | 6.729122008 | 0.009903999 | FBgn0034579 |
| GB53184 | 1.721405991 | 4.85522973  | 0.037528353 | FBgn0032906 |
| GB51410 | 1.718243312 | 6.053920697 | 0.009870622 | FBgn0035110 |
| GB47877 | 1.713698053 | 5.506076003 | 0.032293987 | FBgn0039335 |
| GB48835 | 1.710729673 | 5.023379402 | 0.0444491   | 0           |
| GB43875 | 1.709530219 | 6.173740484 | 0.009870622 | FBgn0051800 |
| GB51003 | 1.708039165 | 6.473015787 | 0.009870622 | FBgn0051913 |
| GB53819 | 1.70672222  | 5.714801471 | 0.0143602   | FBgn0028980 |
| GB50371 | 1.695279785 | 5.051932204 | 0.037528353 | FBgn0050147 |
| GB52258 | 1.694677811 | 5.712990185 | 0.013099305 | FBgn0033527 |
| GB44173 | 1.688862949 | 5.762414736 | 0.010499177 | FBgn0243513 |
| GB55782 | 1.685818826 | 7.045620651 | 0.020279435 | FBgn0033570 |
| GB51993 | 1.683915498 | 5.956412388 | 0.009903999 | FBgn0035592 |
| GB55222 | 1.68061697  | 5.601365798 | 0.016986996 | FBgn0031403 |
| GB54312 | 1.679350632 | 5.81030781  | 0.013099305 | FBgn0038678 |
| GB50981 | 1.674386656 | 5.688039683 | 0.03097423  | FBgn0035169 |
| GB54752 | 1.67329874  | 5.168291585 | 0.037099234 | FBgn0030434 |
| GB42615 | 1.672525185 | 4.97760221  | 0.046834472 | FBgn0042112 |
| GB44600 | 1.668282396 | 5.606301943 | 0.017373875 | FBgn0035398 |
| GB51206 | 1.660507773 | 8.263046489 | 0.035215471 | FBgn0015031 |
| GB44903 | 1.659086573 | 7.573210731 | 0.037528353 | FBgn0015614 |
| GB49433 | 1.654933218 | 6.121355045 | 0.010106983 | FBgn0029148 |
| GB52888 | 1.653012974 | 5.187974796 | 0.043332436 | FBgn0030834 |
| GB54681 | 1.65291092  | 5.223329647 | 0.037028055 | FBgn0035271 |
| GB40270 | 1.651089224 | 5.772535414 | 0.020279435 | FBgn0037979 |
| GB44781 | 1.649456023 | 4.951498305 | 0.03721973  | FBgn0262603 |
| GB54227 | 1.647831003 | 6.634712633 | 0.013099305 | FBgn0036519 |
| GB40018 | 1.641860146 | 5.856465632 | 0.014926471 | FBgn0261789 |
| GB40590 | 1.638924298 | 6.209304522 | 0.009870622 | FBgn0031766 |
| GB46619 | 1.638301767 | 5.274813634 | 0.041784913 | FBgn0043002 |
| GB53661 | 1.632760444 | 6.952912277 | 0.022512639 | FBgn0035247 |
| GB50032 | 1.631243827 | 7.466500227 | 0.035215471 | FBgn0036918 |
| GB42698 | 1.631060525 | 5.85759882  | 0.013099305 | FBgn0010622 |
| GB54387 | 1.629215059 | 6.887059107 | 0.020279435 | FBgn0037899 |
| GB47331 | 1.627416343 | 6.022796491 | 0.009870622 | FBgn0036580 |
| GB50230 | 1.624314852 | 6.876420023 | 0.035806998 | FBgn0035521 |
| GB44033 | 1.619009041 | 10.48412793 | 0.046834472 | FBgn0031980 |

|         |             |             |             |             |
|---------|-------------|-------------|-------------|-------------|
| GB47311 | 1.616054301 | 6.011621106 | 0.014562109 | FBgn0031189 |
| GB55479 | 1.610495187 | 6.446643144 | 0.014562109 | FBgn0041249 |
| GB51118 | 1.609934568 | 6.900108459 | 0.018476012 | FBgn0034361 |
| GB42887 | 1.608600991 | 7.016461682 | 0.031832385 | FBgn0031381 |
| GB47192 | 1.603249311 | 5.980252764 | 0.014562109 | FBgn0036916 |
| GB46688 | 1.6028816   | 5.47939471  | 0.031832385 | FBgn0033199 |
| GB48958 | 1.602523342 | 7.286352881 | 0.031327438 | FBgn0040931 |
| GB48201 | 1.596636449 | 5.922632498 | 0.01232611  | FBgn0050481 |
| GB50335 | 1.596000748 | 7.226786467 | 0.031832385 | FBgn0050354 |
| GB49250 | 1.595462091 | 5.936248572 | 0.016986996 | FBgn0037933 |
| GB51884 | 1.594963432 | 6.949870182 | 0.033581868 | FBgn0029882 |
| GB54205 | 1.59035348  | 5.716488368 | 0.019369986 | FBgn0034402 |
| GB53604 | 1.582873299 | 5.21207526  | 0.046834472 | FBgn0015544 |
| GB52644 | 1.582451586 | 7.849135975 | 0.044390068 | FBgn0016119 |
| GB50167 | 1.580845465 | 6.441892874 | 0.017373875 | FBgn0036774 |
| GB49956 | 1.580233281 | 6.33894492  | 0.014926471 | FBgn0039751 |
| GB43388 | 1.580205814 | 5.383920179 | 0.043460422 | FBgn0013347 |
| GB54100 | 1.576106609 | 6.365660823 | 0.01698474  | FBgn0035469 |
| GB48484 | 1.574837092 | 6.375173758 | 0.018527416 | FBgn0038426 |
| GB55961 | 1.573549044 | 6.800454915 | 0.047199172 | FBgn0263852 |
| GB43376 | 1.571480729 | 6.511939895 | 0.018527416 | FBgn0040076 |
| GB45058 | 1.569312404 | 5.907558079 | 0.014562109 | FBgn0036107 |
| GB45210 | 1.568597814 | 6.850125404 | 0.037971201 | FBgn0025700 |
| GB53410 | 1.560429875 | 5.700848146 | 0.021464184 | FBgn0035436 |
| GB47650 | 1.557397408 | 8.513511637 | 0.048723494 | FBgn0023170 |
| GB47473 | 1.552774971 | 6.174990561 | 0.022512639 | FBgn0040899 |
| GB51498 | 1.549472186 | 5.82846544  | 0.017373875 | FBgn0033402 |
| GB51597 | 1.548176758 | 6.194906675 | 0.014562109 | FBgn0004832 |
| GB55473 | 1.546605769 | 5.635434149 | 0.033672785 | FBgn0040890 |
| GB49365 | 1.546263185 | 5.473048766 | 0.033581868 | FBgn0053198 |
| GB44571 | 1.54424588  | 5.188771487 | 0.047322004 | FBgn0031897 |
| GB55109 | 1.544198823 | 5.98183979  | 0.019952476 | FBgn0034988 |
| GB55161 | 1.541822409 | 5.634316672 | 0.025257869 | FBgn0051251 |
| GB41973 | 1.539129047 | 7.014495383 | 0.047199172 | FBgn0037843 |
| GB46194 | 1.538118236 | 5.234598453 | 0.046166715 | FBgn0039929 |
| GB44443 | 1.5357306   | 5.248940614 | 0.046834472 | FBgn0039135 |
| GB47321 | 1.533456822 | 6.861856255 | 0.025257869 | FBgn0039111 |
| GB51106 | 1.530236957 | 6.115948685 | 0.017373875 | FBgn0033485 |
| GB50549 | 1.525245706 | 5.671416275 | 0.025550709 | FBgn0036668 |
| GB51539 | 1.524535023 | 6.692546334 | 0.020279435 | FBgn0034986 |
| GB52587 | 1.524487726 | 5.246811153 | 0.048723494 | FBgn0032871 |
| GB53513 | 1.523605762 | 4.962105864 | 0.046834472 | FBgn0011291 |
| GB40032 | 1.522590126 | 6.498718645 | 0.016468033 | FBgn0031361 |
| GB42998 | 1.513658021 | 6.411502477 | 0.020279435 | FBgn0038307 |
| GB42488 | 1.510755192 | 5.498326011 | 0.03097423  | FBgn0052576 |
| GB54326 | 1.510384169 | 5.278662999 | 0.046834472 | FBgn0029522 |
| GB42631 | 1.508945718 | 6.064884231 | 0.037528353 | FBgn0034641 |
| GB54976 | 1.504381093 | 7.159922    | 0.047424863 | FBgn0034791 |
| GB45653 | 1.504247234 | 5.491066058 | 0.046834472 | FBgn0032732 |
| GB53335 | 1.503561989 | 5.295503791 | 0.046834472 | FBgn0035211 |
| GB55157 | 1.502782982 | 7.184756951 | 0.048723494 | FBgn0035603 |
| GB55920 | 1.499624634 | 5.511967933 | 0.041784913 | FBgn0037777 |
| GB54450 | 1.499547982 | 6.420741786 | 0.015736955 | FBgn0038302 |
| GB42717 | 1.497373351 | 5.448782145 | 0.048723494 | FBgn0262360 |
| GB42863 | 1.495508682 | 5.745251134 | 0.046834472 | FBgn0035692 |
| GB50928 | 1.49276359  | 6.014738768 | 0.035427863 | FBgn0040389 |

|         |             |             |             |             |
|---------|-------------|-------------|-------------|-------------|
| GB46272 | 1.489923991 | 6.166343987 | 0.040942403 | FBgn0085220 |
| GB41330 | 1.489540185 | 6.758457956 | 0.033581868 | FBgn0040954 |
| GB42205 | 1.489366436 | 5.301225556 | 0.046834472 | FBgn0039404 |
| GB55156 | 1.481968684 | 5.598172853 | 0.035215471 | FBgn0035532 |
| GB46911 | 1.479734814 | 6.796520859 | 0.03827246  | FBgn0038331 |
| GB45367 | 1.47809449  | 5.514657575 | 0.044390068 | FBgn0028992 |
| GB48682 | 1.47699117  | 5.909705092 | 0.032179221 | FBgn0039557 |
| GB55105 | 1.476316804 | 5.96085296  | 0.022512639 | FBgn0086362 |
| GB49234 | 1.475394533 | 6.163156507 | 0.020279435 | FBgn0026089 |
| GB40399 | 1.474160008 | 6.845004872 | 0.043460422 | FBgn0260858 |
| GB50727 | 1.472609149 | 7.144952785 | 0.046834472 | FBgn0010741 |
| GB45946 | 1.472578205 | 5.405927554 | 0.044390068 | FBgn0034000 |
| GB45264 | 1.470524795 | 6.045554139 | 0.022512639 | FBgn0031639 |
| GB42017 | 1.469326723 | 5.450382624 | 0.044390068 | FBgn0050159 |
| GB51581 | 1.468832126 | 6.904397999 | 0.035215471 | FBgn0034854 |
| GB43187 | 1.466862084 | 6.275780507 | 0.038394324 | FBgn0085468 |
| GB50870 | 1.465030931 | 6.318805636 | 0.020279435 | FBgn0034001 |
| GB44608 | 1.463435861 | 6.85190464  | 0.033581868 | FBgn0034645 |
| GB55298 | 1.462638683 | 6.651338823 | 0.031061547 | FBgn0011227 |
| GB48646 | 1.458647853 | 5.932629715 | 0.035806998 | FBgn0004908 |
| GB53663 | 1.456596285 | 6.231261305 | 0.019952476 | FBgn0038106 |
| GB51900 | 1.453862051 | 6.50456445  | 0.031061547 | FBgn0038746 |
| GB45947 | 1.453109663 | 6.746670214 | 0.037528353 | FBgn0024841 |
| GB48470 | 1.451599303 | 6.430776027 | 0.031233643 | FBgn0036847 |
| GB48293 | 1.450521376 | 6.813760613 | 0.033581868 | FBgn0039159 |
| GB55628 | 1.448613391 | 5.725503633 | 0.038394324 | FBgn0051957 |
| GB49402 | 1.447686878 | 5.763310972 | 0.031696781 | FBgn0032821 |
| GB47802 | 1.446740499 | 6.447865586 | 0.032179221 | FBgn0011509 |
| GB41648 | 1.445925515 | 6.615429798 | 0.033581868 | FBgn0067317 |
| GB48754 | 1.440681796 | 5.631701201 | 0.03810028  | FBgn0039664 |
| GB54371 | 1.439604801 | 6.714492003 | 0.037971201 | FBgn0029755 |
| GB48781 | 1.437114077 | 5.546756236 | 0.048901681 | FBgn0030711 |
| GB51624 | 1.437078577 | 6.293947342 | 0.021212993 | FBgn0035534 |
| GB45307 | 1.435413539 | 6.663570132 | 0.037528353 | FBgn0036300 |
| GB47965 | 1.43450171  | 6.328786197 | 0.031061547 | FBgn0038989 |
| GB49013 | 1.434420603 | 6.600254077 | 0.048901681 | FBgn0033378 |
| GB47093 | 1.425786615 | 6.547197264 | 0.037028055 | FBgn0052708 |
| GB49299 | 1.425314097 | 5.710960302 | 0.033581868 | FBgn0030088 |
| GB51623 | 1.423830567 | 6.401837578 | 0.037528353 | FBgn0033754 |
| GB43639 | 1.423816833 | 6.259705012 | 0.029232799 | FBgn0034939 |
| GB54183 | 1.419244716 | 6.600501462 | 0.036802857 | FBgn0003275 |
| GB52250 | 1.415170624 | 6.417190415 | 0.046834472 | FBgn0260390 |
| GB50033 | 1.410831859 | 5.842133163 | 0.037528353 | FBgn0038586 |
| GB45824 | 1.409267276 | 6.038273609 | 0.035806998 | FBgn0023129 |
| GB53186 | 1.394636069 | 5.832400226 | 0.037528353 | FBgn0026741 |
| GB46503 | 1.388949727 | 5.513549149 | 0.046834472 | FBgn0039218 |
| GB41657 | 1.388442824 | 5.788782164 | 0.046834472 | 0           |
| GB53955 | 1.38823351  | 5.921466933 | 0.038394324 | FBgn0031871 |
| GB52806 | 1.387380154 | 6.175456718 | 0.031696781 | FBgn0035337 |
| GB49606 | 1.387273415 | 6.288090912 | 0.037028055 | FBgn0014391 |
| GB42083 | 1.383044647 | 6.445788271 | 0.037028055 | 0           |
| GB54655 | 1.381334371 | 6.142168525 | 0.035806998 | FBgn0037567 |
| GB51484 | 1.379677733 | 6.107263048 | 0.045383402 | FBgn0002736 |
| GB55932 | 1.378719361 | 6.48501583  | 0.041998413 | FBgn0053002 |
| GB46793 | 1.376213337 | 6.275557306 | 0.032179221 | FBgn0050185 |
| GB41905 | 1.372741162 | 5.968107229 | 0.043332436 | FBgn0262467 |

|         |              |             |             |             |
|---------|--------------|-------------|-------------|-------------|
| GB47724 | 1.36805845   | 6.047424563 | 0.045951864 | FBgn0260407 |
| GB42667 | 1.364540378  | 5.828414014 | 0.037528353 | FBgn0260861 |
| GB53037 | 1.363534198  | 6.029731022 | 0.043332436 | FBgn0038662 |
| GB55427 | 1.361166132  | 6.173908765 | 0.034981623 | FBgn0035088 |
| GB43537 | 1.354848358  | 6.776005476 | 0.045383402 | FBgn0033907 |
| GB47176 | 1.352703637  | 6.146445214 | 0.046834472 | FBgn0033480 |
| GB51746 | 1.351781011  | 6.088175587 | 0.034981623 | 0           |
| GB48874 | 1.351357489  | 6.424125035 | 0.044710336 | FBgn0038166 |
| GB55062 | 1.35077453   | 6.025409542 | 0.043460422 | FBgn0039835 |
| GB53270 | 1.350732444  | 6.416879887 | 0.03810028  | FBgn0028919 |
| GB49522 | 1.350039258  | 5.945363807 | 0.043460422 | FBgn0024196 |
| GB46896 | 1.349582871  | 6.165729838 | 0.04557923  | FBgn0010531 |
| GB48064 | 1.345947364  | 6.594566604 | 0.044390068 | FBgn0026261 |
| GB44434 | 1.345234765  | 5.737856665 | 0.0444491   | FBgn0039690 |
| GB47591 | 1.342417764  | 5.640343209 | 0.047322004 | FBgn0034242 |
| GB45549 | 1.342204914  | 6.199747293 | 0.03810028  | FBgn0010438 |
| GB54677 | 1.341957696  | 6.507958767 | 0.037528353 | FBgn0034232 |
| GB48707 | 1.339664259  | 6.327295635 | 0.034898287 | FBgn0024222 |
| GB51224 | 1.33730523   | 5.908131654 | 0.044710336 | FBgn0027359 |
| GB50130 | 1.333992602  | 6.086857766 | 0.043013384 | FBgn0037489 |
| GB52800 | 1.328336317  | 6.192352034 | 0.038394324 | FBgn0023521 |
| GB40686 | 1.328260817  | 5.714713399 | 0.047435062 | FBgn0032033 |
| GB44188 | 1.323678386  | 5.761468565 | 0.045997142 | FBgn0031979 |
| GB44891 | 1.323415277  | 6.702912224 | 0.046834472 | FBgn0039212 |
| GB53418 | 1.32190045   | 5.892947436 | 0.04972344  | FBgn0031836 |
| GB48424 | 1.321599187  | 5.846690234 | 0.048904665 | FBgn0033195 |
| GB46602 | 1.317442353  | 6.257973144 | 0.041784913 | FBgn0261788 |
| GB55944 | 1.31724419   | 5.910604131 | 0.048901681 | FBgn0038323 |
| GB41490 | 1.315327947  | 6.133338729 | 0.044710336 | FBgn0036812 |
| GB40955 | 1.313794825  | 6.214378383 | 0.043332436 | FBgn0046114 |
| GB44925 | 1.308658446  | 6.002521942 | 0.047795993 | FBgn0028688 |
| GB44417 | 1.308477022  | 6.255411926 | 0.046754923 | FBgn0038808 |
| GB48414 | 1.305272235  | 6.407324086 | 0.044390068 | FBgn0260859 |
| GB51081 | 1.300260904  | 6.169468969 | 0.037971201 | FBgn0036922 |
| GB45739 | 1.297477016  | 6.218352811 | 0.046834472 | FBgn0037709 |
| GB45256 | 1.292699083  | 6.256663193 | 0.046834472 | FBgn0033813 |
| GB40349 | 1.283959215  | 6.405720167 | 0.046834472 | FBgn0025336 |
| GB54855 | 1.275544483  | 6.218304699 | 0.046834472 | FBgn0032726 |
| GB53192 | 1.268402911  | 6.200135236 | 0.046834472 | FBgn0002526 |
| GB54469 | 1.267968719  | 6.347556381 | 0.04557923  | FBgn0035980 |
| GB42039 | 1.259923291  | 6.369064173 | 0.047435062 | FBgn0038235 |
| GB54237 | -1.552550515 | 5.667619847 | 0.047258032 | FBgn0025640 |
| GB55388 | -1.826040799 | 7.243835441 | 0.038394324 | FBgn0033763 |

| <b>Contrast 4</b>               |              |               |             |                         |
|---------------------------------|--------------|---------------|-------------|-------------------------|
| <b>High SBV+DWV vs. control</b> |              |               |             |                         |
| <b>Gene Label</b>               | <b>logFC</b> | <b>logCPM</b> | <b>FDR</b>  | <b>Flybase ortholog</b> |
| GB48823                         | 9.975963839  | 8.417408128   | 9.30709E-39 | FBgn0004778             |
| GB47618                         | 9.827890531  | 6.362719241   | 2.35958E-28 | FBgn0010385             |
| GB50423                         | 9.687174813  | 9.60167835    | 6.10994E-42 | FBgn0052055             |
| GB42310                         | 9.533793853  | 3.365841499   | 3.88731E-08 | FBgn0045827             |
| GB43007                         | 9.451446179  | 3.374417338   | 7.98401E-07 | FBgn0030592             |
| GB41428                         | 9.328092198  | 8.624252521   | 1.27755E-31 | FBgn0010385             |
| GB50363                         | 9.222319575  | 3.080676699   | 3.86486E-06 | FBgn0038642             |



|         |             |             |             |             |
|---------|-------------|-------------|-------------|-------------|
| GB47520 | 8.655274915 | 4.253049259 | 3.50255E-13 | FBgn0045827 |
| GB41637 | 8.520853159 | 7.052127165 | 1.0992E-37  | FBgn0030905 |
| GB45912 | 8.469586208 | 10.59916742 | 6.10994E-42 | FBgn0011296 |
| GB51583 | 8.459516563 | 4.023620558 | 4.93732E-12 | FBgn0036117 |
| GB40298 | 8.366299716 | 2.211387043 | 0.001799407 | FBgn0035132 |
| GB51126 | 8.27348174  | 1.995096509 | 0.001197429 | FBgn0036009 |
| GB54001 | 8.27348174  | 2.016415861 | 0.001521608 | FBgn0036481 |
| GB43112 | 8.143481253 | 9.218087316 | 1.22271E-36 | FBgn0028573 |
| GB51223 | 8.05719313  | 11.01821985 | 5.59009E-37 | FBgn0014002 |
| GB48146 | 7.993392793 | 6.353596168 | 7.27656E-21 | FBgn0038071 |
| GB51306 | 7.974619547 | 6.286502708 | 9.95087E-33 | 0           |
| GB47475 | 7.96831875  | 10.39741105 | 1.12207E-40 | FBgn0011296 |
| GB45584 | 7.952718772 | 1.611578215 | 0.005303794 | FBgn0036481 |
| GB55435 | 7.893551009 | 5.166972688 | 5.03355E-22 | FBgn0020626 |
| GB53798 | 7.81835809  | 9.295255704 | 9.27916E-24 | FBgn0032132 |
| GB44824 | 7.690848552 | 1.282696226 | 0.011936386 | FBgn0036278 |
| GB48149 | 7.539621061 | 1.14186126  | 0.025394515 | FBgn0028579 |
| GB41097 | 7.381732963 | 3.683106039 | 7.13235E-10 | FBgn0051954 |
| GB50121 | 7.245072656 | 9.048188585 | 4.01567E-35 | FBgn0029167 |
| GB54238 | 7.11720077  | 6.496912999 | 1.24643E-29 | FBgn0053547 |
| GB45954 | 7.065846041 | 6.334972115 | 9.02035E-20 | FBgn0053196 |
| GB42626 | 7.042181319 | 8.262359378 | 5.89229E-32 | FBgn0005613 |
| GB45910 | 6.95915614  | 11.81098282 | 1.75528E-34 | FBgn0011296 |
| GB42623 | 6.928497292 | 2.385927831 | 0.00016434  | FBgn0026427 |
| GB41361 | 6.850699395 | 2.308999492 | 0.000314394 | FBgn0036575 |
| GB55515 | 6.684262045 | 8.305748408 | 3.46768E-20 | FBgn0036262 |
| GB48833 | 6.683182146 | 7.884694975 | 3.34349E-19 | FBgn0004778 |
| GB45909 | 6.669953266 | 10.97736109 | 5.32259E-33 | FBgn0011296 |
| GB48134 | 6.640245978 | 9.90610792  | 2.78677E-19 | FBgn0001258 |
| GB50477 | 6.605059242 | 8.702711817 | 2.68747E-26 | FBgn0263774 |
| GB49219 | 6.601796479 | 4.135748581 | 2.03612E-11 | FBgn0031905 |
| GB49890 | 6.577252438 | 7.392343432 | 3.36435E-18 | FBgn0033302 |
| GB45906 | 6.458869763 | 10.70981552 | 9.97873E-31 | FBgn0011296 |
| GB51174 | 6.419326178 | 9.563229124 | 1.5538E-29  | FBgn0033661 |
| GB49888 | 6.384027752 | 4.969066396 | 2.47567E-22 | FBgn0000473 |
| GB46223 | 6.354099549 | 3.898467873 | 2.19951E-09 | FBgn0034470 |
| GB49385 | 6.172323183 | 2.395391404 | 0.000131975 | FBgn0051201 |
| GB54881 | 6.164393495 | 5.747745532 | 1.18394E-21 | FBgn0036829 |
| GB47318 | 6.142526381 | 8.933951971 | 4.62317E-18 | FBgn0032835 |
| GB54908 | 6.094525286 | 2.463523717 | 0.001031614 | FBgn0263705 |
| GB43924 | 6.084312345 | 9.797848933 | 6.83455E-27 | FBgn0263072 |
| GB42797 | 6.06963865  | 7.948741933 | 7.37787E-29 | FBgn0037288 |
| GB51196 | 6.005809075 | 1.455012827 | 0.017288065 | FBgn0028847 |
| GB42540 | 5.971309992 | 7.542585215 | 9.6575E-30  | FBgn0037329 |
| GB51419 | 5.967494676 | 6.219174285 | 7.96955E-23 | FBgn0035439 |
| GB41709 | 5.950683941 | 8.099583571 | 4.1927E-25  | FBgn0030691 |
| GB40137 | 5.939271002 | 5.704320675 | 1.53118E-22 | FBgn0038595 |
| GB45907 | 5.84626461  | 9.333251005 | 6.83455E-27 | FBgn0011296 |
| GB42425 | 5.752558188 | 2.457173301 | 4.81244E-05 | FBgn0039640 |
| GB41284 | 5.627548769 | 6.670613729 | 2.68747E-26 | FBgn0050197 |
| GB42621 | 5.563237542 | 9.632901977 | 7.96955E-23 | FBgn0016075 |
| GB52705 | 5.511505186 | 1.679432892 | 0.004911705 | FBgn0085512 |
| GB51833 | 5.494225217 | 0.646694889 | 0.044002455 | FBgn0029762 |
| GB41636 | 5.493197387 | 5.785091883 | 4.29544E-29 | FBgn0013733 |
| GB44871 | 5.488186037 | 6.88067849  | 1.47702E-28 | FBgn0038074 |
| GB41708 | 5.444500833 | 8.704285942 | 4.40495E-22 | FBgn0036597 |

|         |             |             |             |             |
|---------|-------------|-------------|-------------|-------------|
| GB55203 | 5.436293714 | 6.175917193 | 1.11037E-24 | FBgn0034856 |
| GB47546 | 5.423008969 | 4.601256498 | 1.6752E-13  | 0           |
| GB52100 | 5.4036091   | 11.37408553 | 8.24234E-21 | FBgn0000299 |
| GB54139 | 5.352604118 | 5.163817006 | 2.1002E-18  | FBgn0000299 |
| GB41222 | 5.260971249 | 3.537554868 | 4.12275E-08 | FBgn0035132 |
| GB40227 | 5.249862308 | 3.959180069 | 2.32124E-10 | FBgn0036316 |
| GB53860 | 5.244356987 | 8.970756912 | 7.4758E-21  | FBgn0026575 |
| GB51200 | 5.239484073 | 2.030418926 | 0.002704488 | FBgn0005658 |
| GB43739 | 5.223543827 | 3.488392039 | 4.11693E-08 | FBgn0035779 |
| GB55029 | 5.19400533  | 5.310218076 | 9.27766E-21 | FBgn0031176 |
| GB50880 | 5.192202908 | 3.891159108 | 2.75365E-10 | FBgn0263968 |
| GB43027 | 5.185119517 | 3.53256746  | 4.94789E-07 | 0           |
| GB44633 | 5.171349194 | 2.868746884 | 4.05874E-05 | 0           |
| GB41722 | 5.163085651 | 9.801415936 | 3.08826E-17 | FBgn0033246 |
| GB45713 | 5.115874509 | 3.57554981  | 6.95305E-08 | FBgn0031975 |
| GB43775 | 5.098407475 | 1.13412521  | 0.013508927 | FBgn0052683 |
| GB42554 | 5.062613642 | 5.053685002 | 1.53422E-18 | FBgn0036191 |
| GB40288 | 5.032085155 | 4.470607992 | 3.04766E-08 | FBgn0033302 |
| GB49886 | 5.02148742  | 6.659986126 | 9.3425E-21  | FBgn0033302 |
| GB48148 | 4.982300872 | 7.260592941 | 1.73232E-24 | FBgn0034140 |
| GB53930 | 4.929451391 | 0.958310946 | 0.025816214 | FBgn0030003 |
| GB42099 | 4.918199343 | 3.337071906 | 3.1647E-07  | FBgn0027600 |
| GB41717 | 4.892922198 | 1.498034732 | 0.004881958 | FBgn0036871 |
| GB49825 | 4.872403514 | 1.918927485 | 0.001134963 | FBgn0024150 |
| GB48820 | 4.867237402 | 10.56197049 | 9.52545E-21 | FBgn0028985 |
| GB50481 | 4.85457148  | 3.797548036 | 3.04454E-08 | FBgn0023479 |
| GB49442 | 4.834169478 | 3.143004307 | 1.19463E-05 | FBgn0036237 |
| GB52428 | 4.817533139 | 6.15890429  | 1.12512E-28 | FBgn0037126 |
| GB50116 | 4.816326234 | 4.185880851 | 8.22273E-11 | FBgn0036495 |
| GB45708 | 4.758042968 | 3.820691395 | 1.07009E-07 | FBgn0031975 |
| GB41369 | 4.756053569 | 1.373314989 | 0.008317797 | FBgn0019972 |
| GB50124 | 4.747934531 | 3.457090551 | 1.20688E-06 | 0           |
| GB55209 | 4.738051108 | 0.746735807 | 0.047976525 | FBgn0030647 |
| GB51218 | 4.696977306 | 5.160933109 | 1.53522E-18 | 0           |
| GB52919 | 4.679661839 | 7.572477237 | 1.17385E-18 | FBgn0036617 |
| GB44168 | 4.661743549 | 4.731122135 | 4.71501E-13 | FBgn0000490 |
| GB43713 | 4.628461871 | 6.490436593 | 2.91117E-25 | FBgn0038037 |
| GB42514 | 4.6141124   | 3.812345277 | 1.89458E-08 | FBgn0037297 |
| GB47127 | 4.6141124   | 3.850784416 | 4.66417E-08 | FBgn0261832 |
| GB40218 | 4.604826078 | 1.343097472 | 0.024417547 | FBgn0021760 |
| GB49552 | 4.60081581  | 5.816128621 | 3.49206E-14 | FBgn0035501 |
| GB48079 | 4.578252801 | 3.292208072 | 8.04962E-06 | FBgn0051954 |
| GB41706 | 4.569971291 | 4.756519725 | 6.19716E-12 | FBgn0028533 |
| GB44996 | 4.568998713 | 10.06578285 | 3.7612E-14  | FBgn0002564 |
| GB48391 | 4.554138203 | 3.475409395 | 4.80614E-05 | FBgn0038135 |
| GB51861 | 4.52584164  | 1.642645394 | 0.033370526 | FBgn0264078 |
| GB54404 | 4.525256213 | 6.121473284 | 5.49161E-26 | FBgn0051522 |
| GB48969 | 4.512470578 | 4.419453031 | 1.25232E-08 | FBgn0025592 |
| GB49993 | 4.487443702 | 7.448783024 | 5.26474E-14 | FBgn0035787 |
| GB52598 | 4.485618548 | 9.463627067 | 3.44998E-19 | FBgn0032213 |
| GB48130 | 4.435869993 | 0.992608776 | 0.023674369 | FBgn0061197 |
| GB40708 | 4.431139511 | 8.770612777 | 3.62844E-18 | FBgn0029507 |
| GB42985 | 4.427612664 | 6.31078854  | 2.78676E-12 | 0           |
| GB49848 | 4.408373156 | 2.296876711 | 0.001375199 | FBgn0038095 |
| GB52525 | 4.386724966 | 2.490088201 | 0.000557293 | FBgn0032248 |
| GB54289 | 4.375845059 | 6.162550309 | 7.96955E-23 | FBgn0085407 |

|         |             |             |             |             |
|---------|-------------|-------------|-------------|-------------|
| GB47563 | 4.369425745 | 2.62146271  | 0.000543316 | FBgn0035575 |
| GB47270 | 4.338798692 | 3.611306592 | 8.71009E-06 | FBgn0015032 |
| GB50609 | 4.312801166 | 11.42003131 | 2.09335E-16 | FBgn0001219 |
| GB52721 | 4.309893087 | 5.417099922 | 3.32546E-15 | FBgn0002576 |
| GB46230 | 4.291291677 | 2.821553607 | 0.002701727 | FBgn0034470 |
| GB43208 | 4.260919614 | 8.835178394 | 8.53189E-18 | FBgn0036985 |
| GB41283 | 4.255535706 | 6.715810621 | 4.65698E-21 | FBgn0003137 |
| GB45748 | 4.244469711 | 0.774011431 | 0.034381033 | FBgn0015714 |
| GB47398 | 4.237745519 | 1.240358494 | 0.046767901 | FBgn0035060 |
| GB45911 | 4.234400725 | 5.67152759  | 3.62627E-21 | FBgn0011296 |
| GB55206 | 4.230515996 | 1.89091984  | 0.009877679 | FBgn0034856 |
| GB44552 | 4.222721851 | 3.055454823 | 0.004084849 | FBgn0005633 |
| GB48020 | 4.21919196  | 3.773353159 | 2.04649E-06 | FBgn0034294 |
| GB45913 | 4.218993123 | 11.89248093 | 2.22149E-17 | FBgn0011296 |
| GB55204 | 4.201251447 | 5.014175878 | 6.25586E-10 | FBgn0039896 |
| GB42900 | 4.157394828 | 10.78508222 | 2.23952E-14 | FBgn0261564 |
| GB50608 | 4.154481829 | 4.959357077 | 7.41958E-10 | FBgn0033495 |
| GB40148 | 4.150354383 | 4.878796812 | 1.31826E-08 | FBgn0032810 |
| GB55208 | 4.147588776 | 2.421489874 | 0.002602132 | FBgn0041712 |
| GB56028 | 4.142724552 | 7.035446284 | 3.80592E-18 | FBgn0036665 |
| GB49441 | 4.133958846 | 7.995475552 | 4.83092E-16 | FBgn0003450 |
| GB50526 | 4.132490769 | 5.970333973 | 2.47849E-22 | FBgn0038652 |
| GB55205 | 4.084584352 | 6.224717414 | 2.34731E-18 | FBgn0039896 |
| GB45714 | 4.080289933 | 2.465481317 | 0.000846476 | FBgn0031975 |
| GB51467 | 4.046669938 | 2.113447333 | 0.002611818 | FBgn0034140 |
| GB47248 | 4.041357704 | 5.617043237 | 1.51147E-19 | FBgn0031146 |
| GB54219 | 4.024356569 | 9.739541645 | 1.54451E-14 | FBgn0086708 |
| GB46286 | 4.021911515 | 3.920698252 | 1.37578E-07 | FBgn0032144 |
| GB49440 | 4.008289933 | 6.212340223 | 5.1429E-22  | FBgn0039630 |
| GB46587 | 4.000656174 | 8.765332652 | 4.63344E-14 | FBgn0053998 |
| GB42053 | 3.989385319 | 4.867934819 | 4.78171E-11 | FBgn0031381 |
| GB46142 | 3.984553035 | 4.870130278 | 1.36367E-09 | FBgn0026144 |
| GB42146 | 3.954449082 | 7.863642439 | 1.16464E-10 | FBgn0085446 |
| GB42410 | 3.947060772 | 5.497416218 | 1.47704E-10 | FBgn0034638 |
| GB44146 | 3.942675169 | 4.345665864 | 1.61486E-08 | FBgn0034709 |
| GB52318 | 3.922582709 | 3.523837418 | 9.01187E-05 | FBgn0031907 |
| GB47805 | 3.90734622  | 5.211704137 | 5.02005E-13 | FBgn0043575 |
| GB49544 | 3.90149385  | 2.566429997 | 0.000563491 | FBgn0051150 |
| GB42135 | 3.883526112 | 4.645827292 | 1.20048E-10 | FBgn0038201 |
| GB54231 | 3.868303974 | 3.710862018 | 1.48333E-05 | FBgn0024352 |
| GB50005 | 3.866013539 | 8.528113832 | 3.25413E-12 | FBgn0063923 |
| GB47580 | 3.863875153 | 5.480476569 | 3.26204E-17 | FBgn0032817 |
| GB55068 | 3.841939933 | 3.906304886 | 4.46687E-07 | FBgn0085351 |
| GB47771 | 3.840936173 | 1.944451718 | 0.020870977 | FBgn0034745 |
| GB41418 | 3.820915455 | 4.953572289 | 4.65526E-11 | FBgn0002526 |
| GB42244 | 3.816240325 | 8.224996058 | 1.31135E-15 | FBgn0043903 |
| GB45797 | 3.80902794  | 4.244695515 | 1.22869E-05 | FBgn0039896 |
| GB53115 | 3.782584972 | 1.553539354 | 0.010832449 | FBgn0036608 |
| GB45796 | 3.776223883 | 3.656894199 | 2.49045E-05 | FBgn0004034 |
| GB47579 | 3.762041542 | 2.921398984 | 0.000881417 | FBgn0016684 |
| GB52348 | 3.740325191 | 4.051602013 | 5.68224E-07 | FBgn0003162 |
| GB41642 | 3.732489338 | 5.787057101 | 6.23524E-18 | 0           |
| GB55211 | 3.722688172 | 3.711397724 | 0.000106108 | FBgn0032601 |
| GB48903 | 3.69654056  | 4.780609553 | 1.16464E-10 | FBgn0038139 |
| GB46774 | 3.684105765 | 9.572437896 | 5.73761E-12 | FBgn0031322 |
| GB51383 | 3.676908959 | 2.931073836 | 0.000832151 | FBgn0033302 |

|         |             |             |             |             |
|---------|-------------|-------------|-------------|-------------|
| GB42434 | 3.670027302 | 3.172062328 | 0.00056252  | FBgn0034580 |
| GB55452 | 3.664136563 | 9.28669327  | 1.24396E-08 | FBgn0052626 |
| GB56013 | 3.645716342 | 1.467636045 | 0.021412554 | FBgn0035849 |
| GB40021 | 3.634028389 | 11.20050727 | 2.8631E-13  | FBgn0036124 |
| GB40136 | 3.621231566 | 3.668072265 | 2.21625E-05 | FBgn0038595 |
| GB50550 | 3.607729335 | 7.860666893 | 2.03532E-13 | 0           |
| GB44203 | 3.583804144 | 3.691037322 | 0.000185038 | FBgn0037465 |
| GB55451 | 3.583347288 | 9.85017612  | 5.86448E-13 | FBgn0002526 |
| GB47381 | 3.580440394 | 2.230932925 | 0.007047794 | FBgn0053817 |
| GB54732 | 3.542257094 | 5.330627719 | 5.24873E-12 | FBgn0030309 |
| GB53028 | 3.540302413 | 6.592565188 | 4.2113E-17  | FBgn0032116 |
| GB45955 | 3.496577622 | 9.56085769  | 1.55015E-12 | FBgn0260746 |
| GB43362 | 3.481244241 | 6.060507373 | 1.93286E-16 | FBgn0030421 |
| GB55212 | 3.461323206 | 4.85905624  | 4.75014E-06 | FBgn0039896 |
| GB53978 | 3.440300342 | 5.680252985 | 1.92349E-11 | FBgn0023479 |
| GB46013 | 3.423557163 | 6.679846567 | 4.74407E-16 | FBgn0032010 |
| GB54983 | 3.38055012  | 3.437281979 | 0.000219142 | FBgn0035537 |
| GB41806 | 3.376257869 | 7.129965632 | 3.55751E-12 | FBgn0038088 |
| GB44043 | 3.353724907 | 3.718679835 | 0.00017705  | FBgn0028841 |
| GB48905 | 3.353066505 | 8.002920667 | 5.80005E-10 | FBgn0010226 |
| GB40573 | 3.349422112 | 3.242217054 | 0.00056569  | FBgn0261834 |
| GB50883 | 3.345391432 | 5.947647934 | 4.04394E-12 | FBgn0032638 |
| GB54941 | 3.344407794 | 6.214095738 | 2.68615E-16 | FBgn0051720 |
| GB43716 | 3.343830347 | 5.576841828 | 3.06265E-13 | FBgn0038037 |
| GB44634 | 3.328547019 | 5.453029163 | 3.49816E-13 | FBgn0243512 |
| GB54233 | 3.326655816 | 4.920975872 | 1.73649E-09 | FBgn0030964 |
| GB44503 | 3.324183365 | 4.064061312 | 1.42153E-05 | FBgn0085201 |
| GB52631 | 3.28445539  | 5.865409563 | 2.34322E-12 | FBgn0003495 |
| GB40110 | 3.281888653 | 1.962609055 | 0.028105464 | FBgn0061200 |
| GB54942 | 3.278231842 | 5.2066546   | 8.01629E-11 | FBgn0051720 |
| GB45696 | 3.263977743 | 6.939947452 | 7.77778E-12 | FBgn0000567 |
| GB50761 | 3.257571878 | 4.232312014 | 1.21401E-05 | FBgn0038485 |
| GB43728 | 3.211333498 | 6.153763169 | 2.12879E-16 | FBgn0038037 |
| GB46640 | 3.203964792 | 4.285154837 | 7.91371E-06 | FBgn0033628 |
| GB42829 | 3.203393446 | 8.656743436 | 1.05389E-10 | FBgn0034405 |
| GB44995 | 3.192159502 | 3.06697647  | 0.001253475 | FBgn0051008 |
| GB43711 | 3.180610135 | 2.475333302 | 0.027143461 | FBgn0038037 |
| GB55890 | 3.178537068 | 2.343760694 | 0.017940017 | FBgn0034275 |
| GB49672 | 3.166966842 | 4.630768683 | 5.96831E-08 | FBgn0038842 |
| GB55707 | 3.16264217  | 1.671755254 | 0.045649062 | FBgn0037063 |
| GB45157 | 3.158691595 | 5.296840875 | 2.70034E-11 | FBgn0013753 |
| GB52920 | 3.143898689 | 4.573804555 | 7.50043E-07 | FBgn0036618 |
| GB49887 | 3.123639142 | 3.666277002 | 0.000288346 | FBgn0033304 |
| GB41623 | 3.123639142 | 3.695902953 | 0.000997655 | FBgn0035430 |
| GB47407 | 3.068715684 | 3.407748549 | 0.000311202 | FBgn0013981 |
| GB52360 | 3.046777266 | 7.914467028 | 2.35717E-10 | FBgn0034886 |
| GB45495 | 3.028548961 | 10.39956753 | 1.79242E-08 | FBgn0001233 |
| GB44744 | 3.022568042 | 3.94833066  | 3.86421E-05 | FBgn0036101 |
| GB41202 | 3.009122368 | 5.67523618  | 9.11681E-12 | FBgn0027600 |
| GB48687 | 2.991603375 | 6.623541563 | 1.94255E-13 | FBgn0243514 |
| GB47142 | 2.988869501 | 9.107425573 | 1.69564E-09 | FBgn0030608 |
| GB47885 | 2.986516408 | 2.086291535 | 0.019290761 | FBgn0038095 |
| GB42217 | 2.978427662 | 3.624485009 | 0.000411703 | FBgn0039755 |
| GB40287 | 2.968203166 | 3.332207694 | 0.001901531 | FBgn0033302 |
| GB47505 | 2.960159413 | 3.251862212 | 0.001952641 | FBgn0053870 |
| GB49154 | 2.951342099 | 5.227631174 | 1.82149E-08 | FBgn0040491 |

|         |             |             |             |             |
|---------|-------------|-------------|-------------|-------------|
| GB50906 | 2.925165439 | 5.993423686 | 1.50829E-09 | FBgn0032421 |
| GB44004 | 2.917412777 | 5.120821725 | 1.79643E-09 | FBgn0034490 |
| GB47940 | 2.914921559 | 9.211711449 | 2.62434E-09 | FBgn0034096 |
| GB52642 | 2.899512333 | 6.930959424 | 2.53864E-10 | FBgn0030251 |
| GB46984 | 2.897579484 | 6.606214096 | 7.81955E-11 | FBgn0086691 |
| GB46438 | 2.894976595 | 5.911964541 | 4.66699E-11 | FBgn0027594 |
| GB48260 | 2.879985327 | 2.007621968 | 0.035431021 | FBgn0020306 |
| GB50290 | 2.877621432 | 6.702584126 | 2.84695E-12 | FBgn0033033 |
| GB54097 | 2.873066734 | 8.268394461 | 1.61811E-08 | FBgn0011672 |
| GB49176 | 2.85542911  | 1.892584161 | 0.049624073 | FBgn0030720 |
| GB40967 | 2.844948257 | 5.707425686 | 2.50552E-08 | FBgn0005626 |
| GB48129 | 2.844055011 | 2.302889214 | 0.039978618 | FBgn0029880 |
| GB51671 | 2.843579198 | 6.488472885 | 4.27824E-12 | FBgn0030869 |
| GB47939 | 2.838088246 | 5.213224096 | 8.02027E-09 | FBgn0040296 |
| GB42981 | 2.833969186 | 7.65037402  | 2.61351E-09 | FBgn0040323 |
| GB55590 | 2.831345377 | 8.571230223 | 4.91221E-09 | FBgn0025814 |
| GB43708 | 2.815875297 | 12.0273355  | 7.28451E-09 | FBgn0015221 |
| GB53318 | 2.812275168 | 4.853331871 | 1.32094E-06 | FBgn0001291 |
| GB43783 | 2.807786682 | 4.808376865 | 4.16978E-07 | FBgn0032924 |
| GB51650 | 2.798500038 | 4.764823747 | 3.1647E-07  | FBgn0034392 |
| GB48634 | 2.796734737 | 8.765538906 | 6.12462E-09 | FBgn0035438 |
| GB48505 | 2.788596279 | 10.18140069 | 5.87847E-08 | FBgn0026415 |
| GB55889 | 2.788462626 | 6.298612425 | 9.93213E-13 | FBgn0035049 |
| GB52829 | 2.786237192 | 11.12648294 | 7.78996E-08 | FBgn0026415 |
| GB41301 | 2.781631178 | 9.632452562 | 1.20876E-08 | FBgn0000083 |
| GB55030 | 2.766037293 | 9.176040487 | 2.96058E-08 | FBgn0046706 |
| GB45701 | 2.747619187 | 6.283234668 | 1.08397E-11 | FBgn0027930 |
| GB53576 | 2.738183842 | 3.091719321 | 0.015034349 | FBgn0261922 |
| GB53209 | 2.736575937 | 3.36228686  | 0.004367363 | FBgn0261565 |
| GB49147 | 2.71578247  | 3.461338812 | 0.006903891 | FBgn0026565 |
| GB53865 | 2.707274628 | 6.556665741 | 3.60463E-11 | FBgn0013984 |
| GB55930 | 2.673367575 | 4.12908182  | 0.0005564   | FBgn0038072 |
| GB46749 | 2.672526597 | 2.183494292 | 0.035970639 | FBgn0034580 |
| GB50156 | 2.666219306 | 5.510072122 | 1.39477E-09 | FBgn0039225 |
| GB54315 | 2.664500187 | 3.574225364 | 0.020834325 | FBgn0034426 |
| GB42433 | 2.643400694 | 4.835384221 | 2.90084E-06 | FBgn0261797 |
| GB45248 | 2.604842884 | 7.677838973 | 5.52901E-08 | FBgn0032180 |
| GB53143 | 2.601226536 | 6.672144209 | 3.43688E-10 | FBgn0016122 |
| GB44005 | 2.591377149 | 6.650607283 | 2.20185E-10 | FBgn0034490 |
| GB53353 | 2.582823016 | 3.325663583 | 0.005959024 | FBgn0013984 |
| GB40976 | 2.5824245   | 12.42764931 | 1.12161E-06 | FBgn0001233 |
| GB48841 | 2.5794707   | 4.601867423 | 5.64078E-05 | FBgn0038819 |
| GB48194 | 2.574993494 | 4.833798002 | 4.47887E-06 | FBgn0039755 |
| GB43784 | 2.559878412 | 5.811206575 | 2.9539E-10  | FBgn0035770 |
| GB48271 | 2.557685721 | 2.614212697 | 0.029858682 | FBgn0000210 |
| GB55301 | 2.557671095 | 8.006589908 | 1.98939E-07 | FBgn0028926 |
| GB48310 | 2.546776968 | 6.380975253 | 2.58271E-10 | FBgn0038412 |
| GB42741 | 2.544734597 | 5.42689537  | 7.07896E-06 | FBgn0050496 |
| GB43330 | 2.543126278 | 8.681191514 | 5.49878E-06 | FBgn0024319 |
| GB40141 | 2.524097807 | 8.407504362 | 1.38707E-06 | FBgn0038738 |
| GB54946 | 2.501311077 | 3.672594514 | 0.002225344 | FBgn0040299 |
| GB47749 | 2.476155045 | 6.834551283 | 8.23673E-09 | FBgn0039419 |
| GB47723 | 2.471409945 | 4.356627017 | 0.000430984 | FBgn0037387 |
| GB47279 | 2.471062879 | 4.277200393 | 0.000431539 | FBgn0033696 |
| GB54541 | 2.470296076 | 6.941268607 | 8.14984E-08 | FBgn0031973 |
| GB50226 | 2.464513529 | 11.20120234 | 9.12463E-07 | FBgn0022355 |

|         |             |             |             |             |
|---------|-------------|-------------|-------------|-------------|
| GB52191 | 2.455328265 | 7.784980142 | 1.81919E-07 | FBgn0051217 |
| GB47931 | 2.45108398  | 5.593340764 | 2.2396E-06  | FBgn0036316 |
| GB55070 | 2.44892335  | 6.011504344 | 7.18416E-09 | FBgn0027843 |
| GB53077 | 2.441024022 | 5.191849408 | 1.42958E-06 | FBgn0039055 |
| GB53831 | 2.404695561 | 7.088060617 | 5.06066E-07 | FBgn0033382 |
| GB49347 | 2.394552339 | 7.209655106 | 3.03427E-06 | FBgn0033883 |
| GB51345 | 2.392546765 | 8.527308799 | 1.83966E-06 | FBgn0039151 |
| GB49885 | 2.38952027  | 7.354137607 | 3.7973E-05  | FBgn0033304 |
| GB43184 | 2.388481877 | 8.261765095 | 7.7989E-07  | FBgn0030245 |
| GB47478 | 2.386709259 | 8.142381912 | 2.98117E-07 | FBgn0035438 |
| GB44055 | 2.372408239 | 6.47793325  | 2.90335E-08 | FBgn0000250 |
| GB53141 | 2.351804037 | 5.050829581 | 3.73901E-06 | FBgn0033786 |
| GB51760 | 2.350528836 | 6.123452056 | 9.53288E-08 | FBgn0000406 |
| GB40119 | 2.326643774 | 4.768330161 | 2.35027E-05 | FBgn0016013 |
| GB50508 | 2.325867355 | 6.565797434 | 1.89524E-08 | FBgn0243514 |
| GB41127 | 2.31814033  | 2.801415086 | 0.04859317  | FBgn0029896 |
| GB45023 | 2.309525123 | 7.671563593 | 7.14471E-06 | FBgn0032783 |
| GB43731 | 2.308785313 | 11.03661569 | 1.97962E-05 | FBgn0015222 |
| GB40047 | 2.307945371 | 2.925388989 | 0.0258441   | FBgn0016034 |
| GB46601 | 2.302776825 | 3.88104145  | 0.002408818 | FBgn0035583 |
| GB45875 | 2.294743157 | 4.302483579 | 0.000305288 | FBgn0035132 |
| GB47104 | 2.292987852 | 8.031729449 | 1.9437E-06  | FBgn0034162 |
| GB55302 | 2.289602791 | 9.645454339 | 1.19517E-05 | FBgn0033644 |
| GB55096 | 2.270280105 | 8.988512557 | 3.23322E-06 | FBgn0002719 |
| GB51613 | 2.26352513  | 5.299804063 | 6.11113E-06 | FBgn0263219 |
| GB47107 | 2.250564093 | 8.056086126 | 3.11065E-06 | FBgn0036165 |
| GB40508 | 2.250375347 | 5.234513261 | 1.01795E-05 | FBgn0034804 |
| GB46813 | 2.246709244 | 5.033387606 | 3.92965E-05 | FBgn0010246 |
| GB50137 | 2.2347321   | 5.25006488  | 4.58176E-05 | FBgn0004378 |
| GB49327 | 2.229762758 | 5.667801226 | 1.83588E-06 | FBgn0039131 |
| GB54949 | 2.224386767 | 5.557372079 | 3.48011E-07 | FBgn0028978 |
| GB48574 | 2.220788955 | 9.064840911 | 1.45312E-05 | FBgn0040070 |
| GB48344 | 2.210939256 | 4.910107353 | 4.25665E-05 | FBgn0025631 |
| GB54947 | 2.210652258 | 4.773003791 | 5.88609E-05 | FBgn0036235 |
| GB41736 | 2.207930186 | 3.945938813 | 0.003519995 | FBgn0013988 |
| GB42558 | 2.193236683 | 4.166786146 | 0.002609378 | FBgn0041585 |
| GB46612 | 2.192135703 | 4.916009974 | 5.71534E-05 | FBgn0033936 |
| GB50448 | 2.182410323 | 4.90453721  | 0.000145007 | FBgn0039804 |
| GB45688 | 2.181388866 | 9.226134947 | 1.11722E-05 | FBgn0033883 |
| GB48436 | 2.16576965  | 6.689283968 | 4.88175E-07 | FBgn0002567 |
| GB43722 | 2.159158018 | 4.115336738 | 0.007558904 | FBgn0085428 |
| GB54294 | 2.156805292 | 5.565148179 | 4.8342E-06  | FBgn0035348 |
| GB48195 | 2.156662459 | 7.108344829 | 2.32304E-06 | FBgn0086687 |
| GB52810 | 2.151482677 | 5.943843746 | 1.06052E-07 | FBgn0039896 |
| GB49775 | 2.144655139 | 9.143809303 | 4.63529E-05 | FBgn0011296 |
| GB46277 | 2.13926228  | 3.048550999 | 0.035970639 | FBgn0029720 |
| GB50009 | 2.137305528 | 7.865445712 | 1.15806E-05 | FBgn0040532 |
| GB44167 | 2.133758853 | 4.683324983 | 0.000626133 | FBgn0033240 |
| GB51724 | 2.133319291 | 3.481529894 | 0.017556664 | FBgn0039768 |
| GB49614 | 2.126949416 | 6.002253504 | 9.14651E-08 | FBgn0250732 |
| GB52074 | 2.12402376  | 7.929469905 | 8.17755E-06 | FBgn0004654 |
| GB48029 | 2.118217726 | 6.005336906 | 1.16292E-07 | FBgn0032219 |
| GB51043 | 2.114046043 | 4.540287046 | 0.000919202 | FBgn0023535 |
| GB49849 | 2.113382523 | 3.54415973  | 0.017777857 | 0           |
| GB43573 | 2.106395821 | 7.821363432 | 9.02469E-06 | FBgn0032638 |
| GB50418 | 2.104413179 | 6.556788702 | 1.67651E-06 | FBgn0262473 |

|         |             |             |             |             |
|---------|-------------|-------------|-------------|-------------|
| GB50522 | 2.094976191 | 3.582740531 | 0.013812464 | FBgn0037772 |
| GB54367 | 2.09236012  | 5.135405989 | 2.79392E-05 | FBgn0030884 |
| GB42084 | 2.082433986 | 6.545450764 | 3.49866E-07 | FBgn0035132 |
| GB51238 | 2.079954027 | 4.39762049  | 0.001395313 | FBgn0086687 |
| GB53620 | 2.06634396  | 3.728535081 | 0.010054731 | FBgn0261800 |
| GB51741 | 2.056396521 | 7.275547169 | 7.12059E-06 | FBgn0030310 |
| GB45700 | 2.054735324 | 9.720837301 | 4.08753E-05 | FBgn0000533 |
| GB47382 | 2.05393817  | 4.639141854 | 0.001003108 | FBgn0013981 |
| GB44967 | 2.053157164 | 5.414403992 | 1.73124E-05 | FBgn0042094 |
| GB51665 | 2.043654576 | 7.928786975 | 1.65796E-05 | FBgn0032074 |
| GB44214 | 2.041632721 | 5.032131674 | 0.000130132 | FBgn0014141 |
| GB55701 | 2.033330748 | 8.024249696 | 0.001960991 | FBgn0036857 |
| GB54611 | 2.026796313 | 9.766579599 | 0.000332084 | FBgn0028984 |
| GB42426 | 2.011564458 | 5.896959627 | 0.000230656 | FBgn0039640 |
| GB47463 | 1.996129804 | 7.280448987 | 1.37335E-05 | FBgn0001104 |
| GB53549 | 1.991868575 | 5.152414313 | 0.000368142 | FBgn0031037 |
| GB44803 | 1.986044129 | 6.249081109 | 1.57976E-06 | FBgn0035904 |
| GB41387 | 1.98419856  | 3.421073636 | 0.044833816 | FBgn0001128 |
| GB55007 | 1.975233498 | 3.8877172   | 0.011059972 | FBgn0030051 |
| GB47301 | 1.973918371 | 5.576004469 | 7.44566E-06 | FBgn0034605 |
| GB50421 | 1.96913005  | 10.70839518 | 8.96581E-05 | FBgn0000416 |
| GB51551 | 1.964624405 | 7.880590083 | 3.89829E-05 | FBgn0035499 |
| GB42692 | 1.962737733 | 4.9884136   | 0.0001877   | FBgn0003964 |
| GB44213 | 1.961263004 | 7.6253422   | 5.74332E-05 | FBgn0014141 |
| GB55016 | 1.960335222 | 10.13991115 | 0.000116802 | FBgn0033188 |
| GB45704 | 1.955976659 | 6.344611025 | 8.54012E-07 | FBgn0053229 |
| GB53847 | 1.950861149 | 6.490226443 | 3.09944E-06 | FBgn0014906 |
| GB47380 | 1.944580571 | 3.574443908 | 0.028410267 | FBgn0053812 |
| GB40759 | 1.939667617 | 9.566643106 | 0.000119228 | FBgn0043841 |
| GB47849 | 1.938747527 | 6.726869437 | 4.563E-06   | FBgn0038516 |
| GB53221 | 1.93104962  | 4.734193308 | 0.004123881 | 0           |
| GB48626 | 1.930702257 | 7.102891378 | 0.00014207  | FBgn0031528 |
| GB50043 | 1.927030371 | 6.512773407 | 4.41831E-06 | FBgn0259178 |
| GB52115 | 1.920480994 | 7.970607217 | 0.000246586 | FBgn0025456 |
| GB46686 | 1.906499069 | 5.237685228 | 0.000221675 | FBgn0033913 |
| GB43504 | 1.906221491 | 3.502773445 | 0.047534262 | FBgn0001257 |
| GB49688 | 1.904766714 | 8.835782329 | 0.000173641 | FBgn0004577 |
| GB45453 | 1.900114615 | 4.375433593 | 0.004765012 | FBgn0027655 |
| GB40758 | 1.893759711 | 8.728529083 | 0.000230656 | FBgn0033926 |
| GB50598 | 1.888694368 | 9.20520048  | 0.001220022 | FBgn0086254 |
| GB47310 | 1.881735437 | 6.057842518 | 4.11344E-06 | FBgn0030791 |
| GB54426 | 1.878967052 | 6.558567527 | 0.00034774  | FBgn0052512 |
| GB50603 | 1.858096604 | 4.912479321 | 0.000448154 | FBgn0050410 |
| GB49039 | 1.848302779 | 3.617198244 | 0.039564026 | FBgn0034433 |
| GB54051 | 1.843234599 | 5.758371002 | 3.2861E-05  | FBgn0263607 |
| GB40565 | 1.842422768 | 6.104784694 | 4.05701E-06 | FBgn0262866 |
| GB52341 | 1.836489164 | 6.620456028 | 1.82809E-05 | FBgn0013987 |
| GB55998 | 1.834620151 | 6.090672565 | 6.83392E-06 | FBgn0027538 |
| GB53755 | 1.832279537 | 5.186782415 | 0.001571017 | FBgn0029690 |
| GB53550 | 1.823698127 | 6.615005939 | 1.67223E-05 | FBgn0031037 |
| GB49899 | 1.819554507 | 4.240100993 | 0.011685874 | FBgn0263846 |
| GB47055 | 1.816639189 | 5.907892793 | 7.98283E-05 | FBgn0031307 |
| GB52496 | 1.81246692  | 4.857555006 | 0.000788752 | FBgn0026570 |
| GB50136 | 1.812271027 | 8.512974499 | 0.000448154 | FBgn0037007 |
| GB42865 | 1.811689513 | 5.665971137 | 3.80149E-05 | FBgn0036732 |
| GB45639 | 1.803315477 | 4.28009955  | 0.012166729 | FBgn0005612 |

|         |             |             |             |             |
|---------|-------------|-------------|-------------|-------------|
| GB48598 | 1.798350722 | 6.440417387 | 1.42062E-05 | FBgn0011674 |
| GB42466 | 1.796843167 | 4.934907305 | 0.000819164 | FBgn0031760 |
| GB53244 | 1.795398588 | 4.238575421 | 0.010928607 | FBgn0039621 |
| GB55511 | 1.788500841 | 5.868736691 | 2.3657E-05  | FBgn0031461 |
| GB45052 | 1.788222332 | 7.263972263 | 0.0002379   | FBgn0026376 |
| GB47880 | 1.78630048  | 8.934168755 | 0.000482768 | FBgn0003462 |
| GB54480 | 1.782616437 | 5.001928209 | 0.000760205 | FBgn0032515 |
| GB41807 | 1.772751262 | 8.08308626  | 0.000259189 | FBgn0030740 |
| GB52158 | 1.769398477 | 6.495262818 | 9.83534E-05 | FBgn0031975 |
| GB47415 | 1.768750366 | 7.324896218 | 0.000138065 | FBgn0031538 |
| GB52630 | 1.758594443 | 5.386078863 | 0.000304575 | FBgn0036101 |
| GB53412 | 1.742990569 | 7.578053815 | 0.00040248  | FBgn0027571 |
| GB45676 | 1.74149265  | 5.596896894 | 0.000134896 | FBgn0035617 |
| GB41837 | 1.732361422 | 4.151924236 | 0.017558695 | FBgn0038475 |
| GB42738 | 1.729979022 | 5.871685367 | 3.59322E-05 | FBgn0011204 |
| GB50010 | 1.729620237 | 4.632726678 | 0.004213415 | FBgn0035575 |
| GB44143 | 1.723335605 | 6.379382729 | 0.000419405 | FBgn0037022 |
| GB55805 | 1.720164605 | 5.638377505 | 8.82373E-05 | FBgn0050118 |
| GB43572 | 1.710501642 | 8.143397849 | 0.000428948 | FBgn0015575 |
| GB45497 | 1.710047263 | 6.806448456 | 0.00024558  | FBgn0050296 |
| GB51210 | 1.702360716 | 6.828811341 | 0.000264076 | FBgn0039492 |
| GB45617 | 1.699660232 | 6.704421814 | 0.000175666 | FBgn0028343 |
| GB43945 | 1.699186103 | 6.175911844 | 2.88026E-05 | FBgn0061200 |
| GB45135 | 1.692933917 | 6.651752742 | 0.000137174 | FBgn0028982 |
| GB45736 | 1.689019485 | 7.536162532 | 0.000508    | FBgn0016693 |
| GB47486 | 1.685862292 | 3.763406661 | 0.046153396 | FBgn0053812 |
| GB44344 | 1.683442476 | 7.142846424 | 0.000277567 | FBgn0053120 |
| GB49607 | 1.678602919 | 9.772922401 | 0.001012482 | FBgn0032949 |
| GB41313 | 1.678408903 | 6.987614632 | 0.000345352 | FBgn0036501 |
| GB40029 | 1.674247978 | 4.483353588 | 0.014910936 | FBgn0011741 |
| GB42306 | 1.671981372 | 5.326030244 | 0.003796021 | FBgn0262526 |
| GB53401 | 1.671613893 | 6.179116109 | 6.25873E-05 | FBgn0028550 |
| GB52278 | 1.669693371 | 5.549035072 | 0.000327489 | FBgn0014141 |
| GB42141 | 1.665347376 | 9.520344946 | 0.001308977 | FBgn0035811 |
| GB49928 | 1.661229261 | 5.504866617 | 0.000420644 | FBgn0036546 |
| GB52275 | 1.659053074 | 4.254519987 | 0.022351267 | FBgn0029831 |
| GB46367 | 1.647948063 | 6.763390394 | 0.001155083 | FBgn0011693 |
| GB48052 | 1.644831807 | 5.229228204 | 0.001683796 | FBgn0035542 |
| GB49390 | 1.644723348 | 5.711111102 | 0.000257354 | FBgn0028341 |
| GB42057 | 1.634176909 | 4.934777062 | 0.00358227  | FBgn0037121 |
| GB41388 | 1.634021247 | 6.339486462 | 0.0001143   | FBgn0001128 |
| GB50970 | 1.617261356 | 9.270423806 | 0.001538639 | FBgn0040064 |
| GB49580 | 1.614436247 | 5.03832494  | 0.002520069 | FBgn0033452 |
| GB44882 | 1.612159539 | 6.96806401  | 0.000730239 | FBgn0035094 |
| GB42329 | 1.610431039 | 7.239212633 | 0.000690956 | FBgn0262975 |
| GB46766 | 1.606718597 | 7.390153626 | 0.000953955 | FBgn0034577 |
| GB41604 | 1.600856228 | 7.913373129 | 0.001253475 | FBgn0030529 |
| GB40083 | 1.593700827 | 5.81558463  | 0.000193878 | FBgn0032358 |
| GB45147 | 1.592980826 | 8.710482222 | 0.002378389 | FBgn0031913 |
| GB41293 | 1.589913035 | 5.987711527 | 0.000500208 | FBgn0014340 |
| GB49773 | 1.589554962 | 9.224053746 | 0.002004696 | FBgn0003231 |
| GB53567 | 1.587724356 | 4.429596857 | 0.01621565  | FBgn0030482 |
| GB40603 | 1.58702848  | 6.105505932 | 0.000109203 | FBgn0022800 |
| GB43560 | 1.57876302  | 6.336713024 | 0.000759524 | FBgn0044050 |
| GB44774 | 1.574501083 | 4.028352092 | 0.046671814 | FBgn0032076 |
| GB43353 | 1.573794531 | 4.785741976 | 0.006395335 | FBgn0035490 |



|         |             |             |             |             |
|---------|-------------|-------------|-------------|-------------|
| GB41965 | 1.566677061 | 9.7399938   | 0.007844704 | FBgn0031696 |
| GB49774 | 1.56215425  | 5.435149366 | 0.010229281 | 0           |
| GB45350 | 1.560830817 | 6.090451343 | 0.000230656 | FBgn0261642 |
| GB43188 | 1.559286102 | 4.955739734 | 0.005486985 | FBgn0034602 |
| GB47740 | 1.555864962 | 8.430953695 | 0.002840741 | FBgn0036995 |
| GB41735 | 1.549957471 | 7.298462091 | 0.001350043 | FBgn0036565 |
| GB53805 | 1.545114255 | 6.311605444 | 0.000235734 | FBgn0038098 |
| GB55544 | 1.539884833 | 6.664310086 | 0.000649808 | FBgn0261274 |
| GB52454 | 1.539412198 | 4.254189392 | 0.029946304 | FBgn0037714 |
| GB51220 | 1.532092946 | 4.601239242 | 0.016647277 | FBgn0032801 |
| GB43409 | 1.525881956 | 5.401496075 | 0.004074571 | FBgn0025679 |
| GB43920 | 1.523189795 | 6.041191919 | 0.000244927 | FBgn0034958 |
| GB44045 | 1.519703613 | 8.145967027 | 0.00983451  | FBgn0015924 |
| GB40866 | 1.518575295 | 13.03370776 | 0.004329948 | FBgn0001219 |
| GB54056 | 1.515605703 | 7.246440104 | 0.002476793 | FBgn0029823 |
| GB49339 | 1.50675214  | 4.878401263 | 0.008362034 | FBgn0050345 |
| GB48672 | 1.506074616 | 5.547163564 | 0.000835556 | FBgn0037697 |
| GB53428 | 1.50575897  | 4.690186488 | 0.016023649 | FBgn0031261 |
| GB55103 | 1.505041032 | 5.371246411 | 0.002250147 | FBgn0039509 |
| GB40718 | 1.504945569 | 8.999698772 | 0.004656986 | FBgn0020653 |
| GB45038 | 1.499939271 | 6.357068925 | 0.002897913 | FBgn0037010 |
| GB55440 | 1.495676338 | 6.462597697 | 0.000540393 | FBgn0262468 |
| GB54331 | 1.4941728   | 10.00474234 | 0.003795692 | FBgn0013770 |
| GB50430 | 1.482300203 | 5.391753882 | 0.002360588 | FBgn0263929 |
| GB47929 | 1.481604414 | 5.059150866 | 0.009619571 | FBgn0025686 |
| GB49757 | 1.480038536 | 9.162650163 | 0.004367363 | FBgn0037913 |
| GB44613 | 1.47769509  | 4.586441905 | 0.042379453 | FBgn0000320 |
| GB55482 | 1.474462222 | 7.19755672  | 0.002754428 | FBgn0010620 |
| GB43831 | 1.469512207 | 6.618233856 | 0.001421829 | FBgn0031069 |
| GB53043 | 1.468088902 | 7.612906594 | 0.00560765  | FBgn0020762 |
| GB41915 | 1.466239687 | 5.135250682 | 0.007923136 | FBgn0032839 |
| GB40673 | 1.462524178 | 7.408355088 | 0.003396783 | FBgn0030737 |
| GB42500 | 1.461817268 | 6.55992124  | 0.00102768  | FBgn0035976 |
| GB40727 | 1.461647884 | 6.009703692 | 0.000656307 | FBgn0030670 |
| GB52702 | 1.456445811 | 7.794704914 | 0.004545604 | FBgn0034909 |
| GB48407 | 1.456344073 | 4.162074899 | 0.049060018 | FBgn0003964 |
| GB48883 | 1.452127706 | 5.394706655 | 0.004621279 | FBgn0264652 |
| GB49259 | 1.44641993  | 7.57718716  | 0.017161757 | FBgn0030872 |
| GB51125 | 1.446131205 | 8.084843532 | 0.010832449 | FBgn0025885 |
| GB46034 | 1.445686871 | 4.947508674 | 0.011079908 | FBgn0036341 |
| GB42940 | 1.445632046 | 7.523728447 | 0.004074571 | FBgn0013305 |
| GB40232 | 1.443286249 | 10.43189364 | 0.006100696 | FBgn0040309 |
| GB43964 | 1.442067253 | 4.679538527 | 0.016622352 | FBgn0019662 |
| GB48255 | 1.438217261 | 6.878070248 | 0.003236525 | FBgn0039850 |
| GB45735 | 1.434551295 | 4.713038379 | 0.036487496 | FBgn0038912 |
| GB49123 | 1.433946995 | 6.762289926 | 0.002560814 | FBgn0035719 |
| GB44081 | 1.432426206 | 6.484216888 | 0.001086478 | FBgn0035674 |
| GB46276 | 1.431197713 | 8.288848854 | 0.005555027 | FBgn0033799 |
| GB49657 | 1.430288649 | 6.986532855 | 0.004890939 | FBgn0004606 |
| GB47432 | 1.428230057 | 6.40022197  | 0.005900023 | FBgn0020764 |
| GB42424 | 1.421068509 | 4.929178613 | 0.018402057 | 0           |
| GB44751 | 1.420894758 | 8.032471384 | 0.00652745  | FBgn0032167 |
| GB47394 | 1.420246209 | 5.015852545 | 0.017667254 | FBgn0039714 |
| GB52033 | 1.412234353 | 6.009690198 | 0.001589126 | FBgn0261258 |
| GB46266 | 1.409964425 | 5.535317007 | 0.003309054 | FBgn0016126 |
| GB55455 | 1.39923273  | 7.012697393 | 0.006049808 | FBgn0034223 |

|         |             |             |             |             |
|---------|-------------|-------------|-------------|-------------|
| GB53245 | 1.398118849 | 6.949952584 | 0.004048037 | FBgn0034372 |
| GB42685 | 1.390205187 | 6.752220877 | 0.004501932 | FBgn0040323 |
| GB49826 | 1.389640716 | 7.146546392 | 0.010436375 | FBgn0037612 |
| GB50900 | 1.388870248 | 4.887409179 | 0.01940528  | FBgn0017482 |
| GB41818 | 1.384853088 | 8.097453243 | 0.007585319 | FBgn0031992 |
| GB47565 | 1.384706875 | 9.224798921 | 0.020649469 | FBgn0023095 |
| GB44100 | 1.381502844 | 6.087420138 | 0.000823004 | FBgn0013733 |
| GB42608 | 1.378916319 | 6.259784799 | 0.001512742 | FBgn0264294 |
| GB50149 | 1.375249068 | 6.972429483 | 0.012282567 | FBgn0040827 |
| GB48812 | 1.370634569 | 7.202377352 | 0.00567286  | FBgn0037718 |
| GB42168 | 1.367423815 | 7.919587956 | 0.009983198 | FBgn0033906 |
| GB48853 | 1.357080547 | 7.602262634 | 0.010157995 | FBgn0032456 |
| GB42831 | 1.356251552 | 6.323366197 | 0.002064591 | FBgn0039633 |
| GB50096 | 1.353657489 | 5.809616254 | 0.002897913 | FBgn0011205 |
| GB55420 | 1.34152846  | 6.959525494 | 0.00801343  | FBgn0086378 |
| GB40735 | 1.338393359 | 9.656483378 | 0.015144064 | FBgn0000064 |
| GB47201 | 1.338367078 | 8.520816061 | 0.012564959 | FBgn0004657 |
| GB50902 | 1.337565936 | 10.51012594 | 0.01418611  | FBgn0001091 |
| GB51753 | 1.335679912 | 6.98822318  | 0.012731145 | 0           |
| GB42142 | 1.335551959 | 5.833196897 | 0.004037997 | FBgn0001078 |
| GB49240 | 1.333054551 | 7.386724288 | 0.009042772 | FBgn0012036 |
| GB40577 | 1.332181909 | 6.388552428 | 0.002897913 | FBgn0040319 |
| GB45678 | 1.331377882 | 5.87718428  | 0.002286054 | FBgn0033226 |
| GB50680 | 1.330010866 | 6.527626212 | 0.002921484 | FBgn0031662 |
| GB54507 | 1.322289104 | 10.62886709 | 0.021624861 | FBgn0087002 |
| GB48884 | 1.319334381 | 4.736046532 | 0.046886594 | FBgn0264652 |
| GB41778 | 1.314123968 | 6.445943154 | 0.012282567 | FBgn0038257 |
| GB55369 | 1.312884777 | 6.599655232 | 0.009958458 | FBgn0033177 |
| GB44511 | 1.311876247 | 5.677498599 | 0.003618433 | FBgn0262699 |
| GB50784 | 1.308604219 | 5.152258565 | 0.022090803 | FBgn0051922 |
| GB49539 | 1.307315544 | 5.336717016 | 0.016192646 | FBgn0038055 |
| GB40909 | 1.305433205 | 6.227288652 | 0.003780591 | FBgn0032476 |
| GB40578 | 1.303971262 | 6.656999187 | 0.005945219 | FBgn0028703 |
| GB53023 | 1.302329562 | 5.554572789 | 0.010302269 | FBgn0035147 |
| GB51273 | 1.301101717 | 7.07371217  | 0.012746549 | FBgn0037949 |
| GB40899 | 1.296476763 | 4.898096088 | 0.035464295 | FBgn0030485 |
| GB46318 | 1.293448851 | 7.572599834 | 0.024586358 | FBgn0053126 |
| GB55242 | 1.28876365  | 5.719658247 | 0.006160752 | FBgn0050269 |
| GB54863 | 1.286638782 | 7.456004563 | 0.014423799 | FBgn0250848 |
| GB42354 | 1.286578672 | 7.182977424 | 0.011322293 | FBgn0038745 |
| GB40773 | 1.286418685 | 7.458326923 | 0.012850387 | FBgn0030485 |
| GB50271 | 1.286292923 | 6.949898332 | 0.009951578 | FBgn0035432 |
| GB50513 | 1.276750906 | 8.207761356 | 0.020437464 | FBgn0035964 |
| GB45666 | 1.272657116 | 5.191573089 | 0.037131754 | FBgn0038306 |
| GB46537 | 1.27189377  | 6.308343691 | 0.003284002 | FBgn0000477 |
| GB40861 | 1.266913324 | 4.696116875 | 0.047639806 | FBgn0030026 |
| GB51251 | 1.25577307  | 6.011471513 | 0.003618433 | FBgn0037551 |
| GB46184 | 1.253831172 | 7.511944517 | 0.024895689 | FBgn0261283 |
| GB46048 | 1.253736278 | 5.311163359 | 0.019866514 | FBgn0016641 |
| GB51683 | 1.253672168 | 9.594598659 | 0.024873367 | FBgn0000083 |
| GB51740 | 1.248316699 | 6.693369515 | 0.011251899 | FBgn0032943 |
| GB40534 | 1.245534674 | 6.098318041 | 0.004003967 | FBgn0023407 |
| GB48059 | 1.244609691 | 5.078565966 | 0.035253719 | FBgn0000546 |
| GB46201 | 1.244609691 | 5.075564562 | 0.031970319 | FBgn0036843 |
| GB44537 | 1.242255043 | 6.733509687 | 0.012731145 | FBgn0086347 |
| GB45648 | 1.239840337 | 5.56942723  | 0.012694262 | FBgn0013983 |

|         |             |             |             |             |
|---------|-------------|-------------|-------------|-------------|
| GB54968 | 1.233855576 | 5.427015792 | 0.011911289 | FBgn0033380 |
| GB54123 | 1.233155071 | 5.140908418 | 0.030214207 | FBgn0034045 |
| GB42327 | 1.231227174 | 5.938912294 | 0.005380204 | FBgn0262975 |
| GB49352 | 1.229365149 | 5.47244542  | 0.012746549 | FBgn0037986 |
| GB49419 | 1.228287264 | 5.122936021 | 0.032373414 | FBgn0037445 |
| GB46218 | 1.227307984 | 6.076409763 | 0.015049345 | FBgn0034094 |
| GB42281 | 1.225584137 | 5.905643916 | 0.00589524  | FBgn0032482 |
| GB51503 | 1.223991933 | 4.992696841 | 0.03991821  | FBgn0003256 |
| GB45456 | 1.22078705  | 5.587916533 | 0.011333035 | FBgn0264357 |
| GB52793 | 1.219099679 | 6.0407688   | 0.006067345 | FBgn0029896 |
| GB55529 | 1.213704403 | 6.32183642  | 0.007340172 | FBgn0032704 |
| GB55575 | 1.213230355 | 5.438299936 | 0.0209588   | FBgn0040238 |
| GB53046 | 1.211373435 | 6.305151923 | 0.006012    | FBgn0031220 |
| GB43130 | 1.211296171 | 6.271607509 | 0.008213492 | FBgn0259245 |
| GB54764 | 1.20849777  | 5.279512373 | 0.029884272 | FBgn0026404 |
| GB54052 | 1.207342153 | 5.003454174 | 0.044245709 | FBgn0036273 |
| GB43392 | 1.20101445  | 5.446434189 | 0.015637241 | FBgn0261436 |
| GB49519 | 1.200113596 | 6.083152484 | 0.009484375 | FBgn0029911 |
| GB40799 | 1.19717594  | 6.04601078  | 0.006814952 | FBgn0035113 |
| GB54369 | 1.196648045 | 6.60876483  | 0.019304423 | FBgn0086355 |
| GB50857 | 1.196470036 | 6.424357636 | 0.011119052 | FBgn0027581 |
| GB42616 | 1.180322193 | 6.725762328 | 0.02613731  | FBgn0041629 |
| GB42614 | 1.179742711 | 6.232920111 | 0.007729033 | FBgn0032230 |
| GB47395 | 1.176107368 | 7.073018159 | 0.023600221 | FBgn0039714 |
| GB46068 | 1.174426312 | 6.215183188 | 0.008374536 | FBgn0060296 |
| GB53540 | 1.173802877 | 6.813159904 | 0.024275471 | FBgn0263350 |
| GB54861 | 1.173744567 | 6.987155572 | 0.024018463 | FBgn0250848 |
| GB53146 | 1.173304644 | 6.436152547 | 0.011149329 | FBgn0039130 |
| GB41603 | 1.17234126  | 8.487817239 | 0.042295373 | FBgn0029092 |
| GB48111 | 1.171860979 | 7.905428356 | 0.030189778 | FBgn0002284 |
| GB54934 | 1.17130737  | 5.545638822 | 0.020622141 | FBgn0063485 |
| GB53532 | 1.168238459 | 5.316593671 | 0.038752876 | FBgn0044826 |
| GB50730 | 1.164890035 | 8.734308656 | 0.04438076  | FBgn0026418 |
| GB41836 | 1.164356928 | 7.361864066 | 0.030216143 | FBgn0037218 |
| GB44804 | 1.163338389 | 5.839109083 | 0.011767196 | FBgn0035235 |
| GB47626 | 1.161184917 | 5.240341417 | 0.046322291 | FBgn0030052 |
| GB42995 | 1.16026196  | 5.842164575 | 0.016540525 | FBgn0036887 |
| GB52510 | 1.159307148 | 5.830533405 | 0.020235468 | FBgn0033266 |
| GB46580 | 1.151289689 | 5.92245542  | 0.011028886 | FBgn0036141 |
| GB44710 | 1.148555381 | 7.050194686 | 0.028729238 | FBgn0037684 |
| GB48993 | 1.148215278 | 5.267979249 | 0.048988963 | FBgn0013772 |
| GB41027 | 1.147443462 | 5.82343713  | 0.010655601 | FBgn0036505 |
| GB40745 | 1.14450824  | 5.446355556 | 0.021573026 | FBgn0034913 |
| GB51071 | 1.143056642 | 5.663698915 | 0.016689492 | FBgn0033735 |
| GB42969 | 1.142885745 | 6.868172227 | 0.041271236 | FBgn0030452 |
| GB46270 | 1.13823165  | 6.496888313 | 0.015372174 | FBgn0025740 |
| GB47638 | 1.136831184 | 6.700993917 | 0.031382455 | FBgn0032292 |
| GB47159 | 1.134360688 | 6.573678727 | 0.016360985 | FBgn0019972 |
| GB52427 | 1.134136635 | 7.3515801   | 0.036066988 | FBgn0024238 |
| GB40335 | 1.132387744 | 6.154274658 | 0.011973939 | FBgn0039774 |
| GB40251 | 1.131974994 | 5.909385167 | 0.029423819 | FBgn0003396 |
| GB45024 | 1.129002919 | 5.319854226 | 0.04224453  | FBgn0050051 |
| GB40978 | 1.127653183 | 7.39471128  | 0.035114232 | FBgn0029687 |
| GB41591 | 1.125888277 | 5.488606003 | 0.04251763  | FBgn0028540 |
| GB52710 | 1.124449566 | 5.766512978 | 0.024153443 | 0           |
| GB48378 | 1.121823036 | 5.924099539 | 0.014780106 | FBgn0053526 |

|         |             |             |             |             |
|---------|-------------|-------------|-------------|-------------|
| GB50534 | 1.121362629 | 6.486323713 | 0.018196636 | FBgn0039044 |
| GB54753 | 1.121050656 | 8.390878625 | 0.049624073 | FBgn0000579 |
| GB41520 | 1.120383704 | 6.089688118 | 0.015999393 | FBgn0001139 |
| GB50813 | 1.120158139 | 6.655635052 | 0.020916376 | FBgn0023172 |
| GB55535 | 1.119684756 | 6.068305757 | 0.011439352 | FBgn0003410 |
| GB55426 | 1.119670368 | 8.598142509 | 0.049930288 | FBgn0087007 |
| GB44312 | 1.119572643 | 5.557461875 | 0.021573026 | FBgn0036988 |
| GB53415 | 1.118849406 | 7.269183498 | 0.036803932 | FBgn0036318 |
| GB54673 | 1.118069875 | 5.29076026  | 0.048535828 | FBgn0027865 |
| GB44980 | 1.116888669 | 7.450498114 | 0.046767901 | FBgn0032910 |
| GB51496 | 1.115520259 | 5.388269267 | 0.041068296 | FBgn0250819 |
| GB47482 | 1.112331117 | 5.562823016 | 0.022420423 | FBgn0053843 |
| GB44976 | 1.109609273 | 6.153159044 | 0.017642616 | FBgn0016076 |
| GB46275 | 1.10894249  | 5.345455066 | 0.03994067  | FBgn0004106 |
| GB47614 | 1.10499348  | 6.091221385 | 0.015034349 | FBgn0259163 |
| GB41549 | 1.104101273 | 5.842473419 | 0.021818503 | FBgn0011837 |
| GB52742 | 1.103335046 | 6.568441269 | 0.021636336 | FBgn0020521 |
| GB52152 | 1.101825405 | 5.974614624 | 0.018799562 | FBgn0034894 |
| GB54083 | 1.099193142 | 5.396161251 | 0.04881314  | FBgn0004395 |
| GB45775 | 1.098032092 | 5.72700975  | 0.034437145 | FBgn0034166 |
| GB41808 | 1.097253494 | 7.160436735 | 0.040346151 | FBgn0051694 |
| GB54158 | 1.093729679 | 5.376931035 | 0.04422699  | FBgn0260933 |
| GB42000 | 1.088451198 | 6.386379099 | 0.043473243 | FBgn0000479 |
| GB52725 | 1.08570616  | 6.014595026 | 0.018851229 | FBgn0034410 |
| GB52189 | 1.085039156 | 6.132758409 | 0.017339984 | FBgn0037989 |
| GB50375 | 1.084028542 | 5.347770219 | 0.036487496 | FBgn0038275 |
| GB54268 | 1.083527193 | 6.441396876 | 0.026095399 | FBgn0031589 |
| GB46962 | 1.078675167 | 7.206145873 | 0.045032573 | FBgn0035772 |
| GB49813 | 1.074075996 | 5.704131798 | 0.028622677 | FBgn0029512 |
| GB49471 | 1.073026654 | 6.838428406 | 0.044386874 | FBgn0032509 |
| GB50976 | 1.071830647 | 6.544537032 | 0.037199309 | FBgn0083919 |
| GB46896 | 1.071778389 | 6.130635572 | 0.026567657 | FBgn0010531 |
| GB54852 | 1.069949516 | 6.704303617 | 0.039651064 | FBgn0032006 |
| GB49949 | 1.067284231 | 6.594705087 | 0.028324965 | FBgn0035850 |
| GB42417 | 1.06535729  | 5.382667189 | 0.049111869 | FBgn0052280 |
| GB40540 | 1.065055849 | 6.096247979 | 0.034012097 | FBgn0033916 |
| GB44658 | 1.060894068 | 6.111128013 | 0.016940699 | FBgn0030183 |
| GB44789 | 1.060391151 | 5.921818184 | 0.02774923  | FBgn0034118 |
| GB49284 | 1.055899362 | 6.300733247 | 0.037491624 | FBgn0262516 |
| GB55259 | 1.055203786 | 5.652619026 | 0.03533313  | FBgn0033987 |
| GB41225 | 1.050294365 | 6.314424255 | 0.020778984 | FBgn0033635 |
| GB50265 | 1.049854755 | 6.442952083 | 0.033163144 | FBgn0001149 |
| GB50731 | 1.048650681 | 5.620521594 | 0.031929106 | FBgn0036932 |
| GB54164 | 1.043821295 | 6.16912726  | 0.021624861 | FBgn0051145 |
| GB41660 | 1.042000064 | 5.695202681 | 0.048698801 | FBgn0026199 |
| GB51019 | 1.037701223 | 6.598142726 | 0.035842958 | FBgn0261554 |
| GB45040 | 1.035354007 | 6.336693735 | 0.038239344 | FBgn0043364 |
| GB54188 | 1.035149606 | 5.880023628 | 0.028519506 | FBgn0031950 |
| GB40999 | 1.022216192 | 5.873047122 | 0.035253719 | FBgn0031030 |
| GB51188 | 1.019919727 | 6.543217713 | 0.037079303 | FBgn0033476 |
| GB41036 | 1.018191537 | 5.888520105 | 0.035423337 | FBgn0015558 |
| GB55287 | 1.000093222 | 5.800387848 | 0.04591511  | FBgn0037012 |
| GB48126 | 0.998497574 | 6.302054787 | 0.044386874 | FBgn0030869 |
| GB42726 | 0.995500512 | 6.051358152 | 0.0334288   | FBgn0040877 |
| GB46291 | 0.98972851  | 6.571530756 | 0.04627052  | FBgn0037063 |
| GB46921 | 0.986818613 | 6.189435782 | 0.042026859 | FBgn0033028 |

|         |              |             |             |             |
|---------|--------------|-------------|-------------|-------------|
| GB41916 | 0.976231107  | 5.861619472 | 0.044372243 | FBgn0051248 |
| GB53070 | 0.959701668  | 6.195777984 | 0.039988438 | FBgn0052380 |
| GB40417 | 0.956070153  | 6.063746244 | 0.044731037 | FBgn0030769 |
| GB50218 | -1.012131746 | 6.056209397 | 0.046767901 | FBgn0022774 |
| GB44445 | -1.041599118 | 6.239267301 | 0.038048933 | FBgn0031868 |
| GB43628 | -1.054044759 | 6.220456881 | 0.048698801 | FBgn0035445 |
| GB45612 | -1.061611644 | 6.634119751 | 0.039793879 | FBgn0004368 |
| GB45623 | -1.069688374 | 6.567795127 | 0.038013647 | FBgn0000709 |
| GB48102 | -1.072152187 | 6.441951786 | 0.035550663 | FBgn0040507 |
| GB42196 | -1.073316628 | 6.365553122 | 0.038155607 | FBgn0032252 |
| GB52743 | -1.074408317 | 6.125640023 | 0.031647061 | FBgn0004875 |
| GB41901 | -1.082158808 | 6.430916733 | 0.037072658 | FBgn0035228 |
| GB40517 | -1.090372837 | 6.250403671 | 0.031432017 | FBgn0029708 |
| GB41882 | -1.091136152 | 6.568340348 | 0.034265445 | FBgn0029936 |
| GB52618 | -1.098239309 | 6.644326341 | 0.042689394 | FBgn0038744 |
| GB44959 | -1.100153517 | 6.29508967  | 0.040118612 | 0           |
| GB44679 | -1.102910446 | 7.128541459 | 0.04830927  | FBgn0027951 |
| GB52611 | -1.102926689 | 6.091429189 | 0.024018463 | FBgn0034606 |
| GB42147 | -1.106997012 | 6.218149328 | 0.023780243 | FBgn0030600 |
| GB45120 | -1.110168478 | 5.749263607 | 0.034173827 | FBgn0003187 |
| GB49382 | -1.113108827 | 6.4931503   | 0.02825128  | FBgn0004870 |
| GB51337 | -1.114950555 | 6.98474651  | 0.042059907 | FBgn0264324 |
| GB45313 | -1.11659392  | 6.407172448 | 0.030186652 | FBgn0036481 |
| GB55822 | -1.11970099  | 7.000383765 | 0.042455583 | FBgn0261360 |
| GB44673 | -1.120362674 | 6.571898678 | 0.032373414 | FBgn0044452 |
| GB43537 | -1.124692819 | 5.814746452 | 0.038574722 | FBgn0033907 |
| GB50409 | -1.127321863 | 5.979608384 | 0.021650288 | FBgn0038464 |
| GB43238 | -1.129390242 | 8.083153883 | 0.046004616 | FBgn0039120 |
| GB47596 | -1.129460947 | 6.110160203 | 0.02119483  | FBgn0032517 |
| GB50232 | -1.133219492 | 5.893343876 | 0.024978403 | FBgn0039738 |
| GB54092 | -1.135225778 | 6.918048466 | 0.039909932 | FBgn0010825 |
| GB46700 | -1.137264946 | 7.756301423 | 0.049624073 | FBgn0263077 |
| GB54780 | -1.138586649 | 6.282125538 | 0.023080943 | FBgn0261787 |
| GB46630 | -1.141466159 | 6.959800842 | 0.03738176  | FBgn0086697 |
| GB41909 | -1.148107079 | 6.022757035 | 0.020778984 | FBgn0041161 |
| GB46526 | -1.148558157 | 7.126850185 | 0.034502649 | FBgn0035802 |
| GB52472 | -1.15406159  | 6.9317087   | 0.033963531 | FBgn0023081 |
| GB55003 | -1.155485683 | 6.188192346 | 0.027961434 | FBgn0036801 |
| GB48994 | -1.159477816 | 6.232466606 | 0.02057185  | FBgn0015278 |
| GB46614 | -1.16058101  | 8.195650489 | 0.044187803 | FBgn0053208 |
| GB45318 | -1.162340166 | 8.738660085 | 0.043473243 | FBgn0052499 |
| GB48533 | -1.163515871 | 7.757863818 | 0.036803932 | FBgn0004401 |
| GB49960 | -1.167159043 | 5.97372302  | 0.018508126 | FBgn0030895 |
| GB53948 | -1.167340633 | 7.685406905 | 0.036388284 | FBgn0037060 |
| GB54301 | -1.169036464 | 6.211080721 | 0.049687319 | FBgn0030605 |
| GB51748 | -1.172202865 | 6.139665635 | 0.015634162 | FBgn0029157 |
| GB50515 | -1.17456726  | 6.509490554 | 0.019144509 | FBgn0025702 |
| GB44155 | -1.175643784 | 7.377109885 | 0.031037333 | FBgn0039728 |
| GB43108 | -1.18035789  | 5.801670357 | 0.023892958 | FBgn0034689 |
| GB53672 | -1.180629474 | 9.152513621 | 0.037240713 | FBgn0014163 |
| GB41803 | -1.184343478 | 7.891400741 | 0.032167223 | FBgn0262519 |
| GB42579 | -1.18434354  | 5.990062933 | 0.013813425 | FBgn0262738 |
| GB41239 | -1.185331188 | 6.660198177 | 0.031706919 | FBgn0034878 |
| GB53323 | -1.185592961 | 5.378406057 | 0.045630493 | FBgn0045063 |
| GB40699 | -1.186509033 | 6.463193837 | 0.01949561  | FBgn0029114 |
| GB43207 | -1.188832001 | 5.966674662 | 0.015728672 | FBgn0261260 |

|         |              |             |             |             |
|---------|--------------|-------------|-------------|-------------|
| GB54731 | -1.188938142 | 5.504930024 | 0.041196655 | FBgn0035799 |
| GB45881 | -1.195021553 | 6.585352619 | 0.021266743 | FBgn0259166 |
| GB51494 | -1.199238275 | 8.673996346 | 0.037716129 | FBgn0034356 |
| GB48851 | -1.202566812 | 5.751610641 | 0.020778984 | FBgn0011225 |
| GB42356 | -1.203358252 | 7.191768768 | 0.024037459 | FBgn0051550 |
| GB41629 | -1.203674531 | 6.918572303 | 0.024492936 | FBgn0025936 |
| GB40075 | -1.20504542  | 6.39578422  | 0.01498088  | FBgn0262743 |
| GB46479 | -1.210921957 | 7.038816931 | 0.022420423 | FBgn0044324 |
| GB42740 | -1.213115885 | 6.145190381 | 0.011439352 | FBgn0038341 |
| GB53753 | -1.213450513 | 5.789472175 | 0.019304423 | FBgn0030796 |
| GB49957 | -1.215418198 | 5.65147826  | 0.022636454 | FBgn0044328 |
| GB47106 | -1.215476367 | 8.118396067 | 0.027727402 | FBgn0017566 |
| GB47181 | -1.217244861 | 6.9266721   | 0.026735486 | FBgn0031021 |
| GB46725 | -1.219719723 | 5.687422248 | 0.022709641 | FBgn0259211 |
| GB44180 | -1.221936257 | 6.147861591 | 0.010787971 | FBgn0015600 |
| GB44404 | -1.229301128 | 5.77548772  | 0.014091796 | FBgn0050491 |
| GB41740 | -1.231055325 | 6.295138907 | 0.01414006  | FBgn0021760 |
| GB53125 | -1.231793658 | 6.748006595 | 0.022636454 | FBgn0015391 |
| GB49584 | -1.235162372 | 6.531371181 | 0.026554905 | FBgn0086712 |
| GB50202 | -1.236252376 | 7.693565796 | 0.024492936 | FBgn0028577 |
| GB42567 | -1.236348341 | 5.843954947 | 0.012926377 | FBgn0259175 |
| GB53790 | -1.237113935 | 5.96926544  | 0.010655601 | FBgn0052758 |
| GB49098 | -1.237939411 | 5.503061996 | 0.024018463 | FBgn0020445 |
| GB49777 | -1.239002341 | 5.288817788 | 0.026845832 | FBgn0040336 |
| GB45717 | -1.239127996 | 7.36273207  | 0.021701636 | FBgn0000317 |
| GB42959 | -1.243909593 | 5.518304858 | 0.017161757 | FBgn0000183 |
| GB53565 | -1.24596045  | 7.160689741 | 0.023098629 | FBgn0038180 |
| GB55578 | -1.249561296 | 6.093419072 | 0.008352991 | FBgn0040752 |
| GB43099 | -1.252162514 | 6.691808527 | 0.018078672 | FBgn0028982 |
| GB55586 | -1.253446286 | 7.309311641 | 0.020103818 | FBgn0053196 |
| GB42043 | -1.254019863 | 6.518913022 | 0.021573026 | FBgn0051159 |
| GB54130 | -1.255549034 | 5.780899577 | 0.020778984 | FBgn0053554 |
| GB49749 | -1.256603555 | 5.855757854 | 0.011952812 | FBgn0039589 |
| GB51800 | -1.257015945 | 7.453361524 | 0.023988253 | FBgn0015903 |
| GB50870 | -1.26229273  | 5.306575082 | 0.020469687 | FBgn0034001 |
| GB40489 | -1.263044202 | 7.481343758 | 0.021961571 | FBgn0019957 |
| GB40348 | -1.263953025 | 7.296472514 | 0.021637974 | FBgn0015589 |
| GB52948 | -1.264431888 | 5.60416818  | 0.020778984 | FBgn0041706 |
| GB51775 | -1.276459777 | 7.370072505 | 0.017161757 | FBgn0011225 |
| GB47675 | -1.280087721 | 6.010777638 | 0.013003728 | FBgn0003089 |
| GB47661 | -1.280837392 | 6.000393509 | 0.009916574 | FBgn0003423 |
| GB40519 | -1.280986069 | 5.940916802 | 0.009453552 | FBgn0032741 |
| GB53305 | -1.282806066 | 6.036530646 | 0.007363876 | FBgn0085447 |
| GB54474 | -1.283053224 | 6.633595265 | 0.022754713 | FBgn0043070 |
| GB52985 | -1.285546977 | 8.710335246 | 0.020733401 | FBgn0043884 |
| GB43798 | -1.287314212 | 6.981249215 | 0.014780106 | FBgn0000542 |
| GB45413 | -1.291093552 | 5.705250554 | 0.015747903 | FBgn0085403 |
| GB45017 | -1.293590335 | 6.521714156 | 0.007585319 | FBgn0051719 |
| GB50158 | -1.294061927 | 11.04771897 | 0.017825316 | FBgn0003279 |
| GB50213 | -1.296872534 | 5.939055738 | 0.016152704 | FBgn0033816 |
| GB50675 | -1.297527699 | 6.824507407 | 0.015742296 | FBgn0259978 |
| GB50407 | -1.298133097 | 5.509931491 | 0.019290761 | FBgn0000163 |
| GB42098 | -1.30306931  | 5.267654284 | 0.036487496 | FBgn0001311 |
| GB45564 | -1.307976968 | 6.786357924 | 0.012417585 | FBgn0027585 |
| GB44772 | -1.31220623  | 7.502093681 | 0.01472248  | FBgn0031515 |
| GB50408 | -1.313203247 | 6.190019337 | 0.020535848 | FBgn0036726 |

|         |              |             |             |             |
|---------|--------------|-------------|-------------|-------------|
| GB48425 | -1.31333077  | 7.249076502 | 0.015935842 | FBgn0050147 |
| GB44482 | -1.313901    | 5.998030491 | 0.008198544 | FBgn0261794 |
| GB49067 | -1.314248218 | 6.539135302 | 0.007386361 | FBgn0033782 |
| GB51966 | -1.316208278 | 5.44209607  | 0.013757462 | FBgn0038968 |
| GB49836 | -1.32192498  | 6.017423732 | 0.007340172 | FBgn0053265 |
| GB55755 | -1.322005268 | 5.481026878 | 0.016373131 | FBgn0003016 |
| GB40741 | -1.324182256 | 5.808441828 | 0.007905609 | FBgn0052133 |
| GB44656 | -1.324599996 | 5.908082015 | 0.006582239 | FBgn0000289 |
| GB40865 | -1.326014805 | 9.634918979 | 0.015770532 | FBgn0061197 |
| GB54226 | -1.329281081 | 5.394602537 | 0.02045903  | FBgn0262029 |
| GB52827 | -1.332380219 | 6.901883198 | 0.010495245 | FBgn0260742 |
| GB47177 | -1.333373265 | 6.266668573 | 0.009981156 | FBgn0037549 |
| GB48192 | -1.334895011 | 5.919488278 | 0.005016816 | FBgn0003016 |
| GB42564 | -1.338372145 | 6.253730303 | 0.00567286  | FBgn0042693 |
| GB48028 | -1.342521388 | 5.707945005 | 0.010612633 | FBgn0023076 |
| GB52106 | -1.343459015 | 5.674654706 | 0.009248317 | FBgn0004885 |
| GB44333 | -1.347141056 | 9.250815273 | 0.014423799 | FBgn0034253 |
| GB42728 | -1.356711441 | 5.910295482 | 0.008987059 | FBgn0264255 |
| GB55897 | -1.358316483 | 5.084324248 | 0.036487496 | FBgn0034075 |
| GB52253 | -1.359821143 | 8.76961996  | 0.012953834 | FBgn0261710 |
| GB47320 | -1.360944577 | 5.104689249 | 0.02186642  | FBgn0039020 |
| GB40363 | -1.362846942 | 5.993923835 | 0.008156179 | FBgn0086698 |
| GB55485 | -1.364626731 | 5.766148974 | 0.006560406 | FBgn0026573 |
| GB46618 | -1.365784593 | 8.915481127 | 0.012274627 | FBgn0002528 |
| GB53574 | -1.367587642 | 6.255567777 | 0.003490829 | FBgn0052600 |
| GB44941 | -1.368324614 | 7.387715039 | 0.010151248 | FBgn0020443 |
| GB55162 | -1.370844386 | 7.068134334 | 0.011036644 | FBgn0030870 |
| GB43884 | -1.37147972  | 4.966512374 | 0.045630493 | FBgn0031252 |
| GB48946 | -1.372647292 | 7.497078529 | 0.011245664 | FBgn0038725 |
| GB51332 | -1.376366666 | 5.168577477 | 0.022648112 | FBgn0028487 |
| GB50871 | -1.376533442 | 6.283121942 | 0.004084849 | FBgn0025625 |
| GB51962 | -1.376550655 | 8.777155331 | 0.011858291 | FBgn0086902 |
| GB42489 | -1.381915286 | 6.744660081 | 0.01378901  | FBgn0016081 |
| GB43338 | -1.382407456 | 5.576176403 | 0.009531735 | FBgn0020251 |
| GB48385 | -1.383176737 | 7.823826744 | 0.010107707 | FBgn0040271 |
| GB45145 | -1.385306364 | 7.002221288 | 0.007341842 | FBgn0250785 |
| GB48573 | -1.387015048 | 7.371025817 | 0.01583855  | FBgn0032026 |
| GB42428 | -1.397214873 | 5.592127074 | 0.008519719 | FBgn0038407 |
| GB53782 | -1.40114847  | 6.471801004 | 0.002861493 | FBgn0261564 |
| GB49308 | -1.40125894  | 6.25201007  | 0.010952441 | FBgn0085638 |
| GB52424 | -1.404730535 | 6.404913896 | 0.002713233 | FBgn0023023 |
| GB52213 | -1.405999509 | 5.45231898  | 0.012024083 | FBgn0035798 |
| GB54699 | -1.408833638 | 6.74329744  | 0.007705866 | FBgn0038676 |
| GB55375 | -1.413265856 | 7.60914946  | 0.007845807 | FBgn0083956 |
| GB54806 | -1.414809124 | 6.410068219 | 0.006271116 | FBgn0051100 |
| GB41143 | -1.417487681 | 7.839616295 | 0.007340172 | FBgn0037001 |
| GB52722 | -1.419726126 | 5.42120563  | 0.009134209 | FBgn0030946 |
| GB54851 | -1.421695951 | 5.732646281 | 0.0044157   | FBgn0037000 |
| GB55568 | -1.422408197 | 6.961725315 | 0.009484375 | FBgn0038742 |
| GB42899 | -1.424726821 | 5.641434207 | 0.006647866 | FBgn0085224 |
| GB44799 | -1.42536315  | 5.830294115 | 0.006591691 | FBgn0030060 |
| GB52469 | -1.427035253 | 6.953010084 | 0.005220168 | FBgn0029095 |
| GB45355 | -1.427988399 | 5.425643051 | 0.008912148 | FBgn0038953 |
| GB51558 | -1.428042601 | 5.471486817 | 0.012568344 | FBgn0050263 |
| GB43978 | -1.430253812 | 7.212009581 | 0.006443952 | FBgn0036483 |
| GB55549 | -1.432945511 | 5.016346871 | 0.030334955 | FBgn0039617 |

|         |              |             |             |             |
|---------|--------------|-------------|-------------|-------------|
| GB43223 | -1.434703206 | 5.265517524 | 0.014588233 | FBgn0040228 |
| GB47299 | -1.437201202 | 6.518050656 | 0.003563804 | FBgn0039084 |
| GB51335 | -1.437252835 | 7.16471906  | 0.005170603 | FBgn0036762 |
| GB44030 | -1.437372972 | 6.638476906 | 0.004869088 | FBgn0031384 |
| GB52848 | -1.438205026 | 7.521734795 | 0.005641825 | FBgn0030266 |
| GB43684 | -1.438250141 | 5.429266483 | 0.00884554  | FBgn0030778 |
| GB47321 | -1.439792569 | 5.728792195 | 0.007196919 | FBgn0039111 |
| GB49732 | -1.445599224 | 5.651633447 | 0.007962712 | FBgn0262562 |
| GB40077 | -1.445978217 | 8.211436248 | 0.009139859 | FBgn0027601 |
| GB55982 | -1.446502993 | 5.861217964 | 0.004504339 | FBgn0035146 |
| GB44899 | -1.447061449 | 7.462453896 | 0.005304666 | FBgn0261885 |
| GB43617 | -1.458337073 | 6.440171808 | 0.001935954 | FBgn0038467 |
| GB46429 | -1.459757343 | 7.54368401  | 0.005471971 | FBgn0000527 |
| GB48658 | -1.462826886 | 8.255941427 | 0.005608549 | FBgn0002306 |
| GB48488 | -1.466161432 | 4.911888523 | 0.02540553  | FBgn0017429 |
| GB49380 | -1.466464288 | 6.002527547 | 0.002476793 | FBgn0034145 |
| GB47043 | -1.46787234  | 7.023935562 | 0.004765012 | FBgn0261439 |
| GB52266 | -1.476336015 | 6.637357542 | 0.004387618 | FBgn0004598 |
| GB45148 | -1.478582415 | 5.446774264 | 0.008019524 | FBgn0032783 |
| GB43459 | -1.479152106 | 6.859271472 | 0.004911705 | FBgn0003862 |
| GB53010 | -1.484022618 | 7.793279439 | 0.006129654 | FBgn0037579 |
| GB51791 | -1.488961699 | 6.069319139 | 0.00112874  | FBgn0038108 |
| GB45905 | -1.491827425 | 6.715382419 | 0.00481365  | FBgn0027287 |
| GB43935 | -1.493242483 | 7.597567081 | 0.014383808 | FBgn0032685 |
| GB50627 | -1.495455362 | 7.31627435  | 0.004074571 | FBgn0039620 |
| GB44998 | -1.496370476 | 5.477077346 | 0.005229046 | FBgn0037707 |
| GB55532 | -1.496480936 | 4.771880785 | 0.033338936 | FBgn0037051 |
| GB48981 | -1.497051238 | 6.937951028 | 0.004083542 | FBgn0034517 |
| GB50455 | -1.498289763 | 7.342211503 | 0.004919102 | FBgn0011217 |
| GB41250 | -1.501804481 | 6.449871803 | 0.001185691 | FBgn0036624 |
| GB43179 | -1.504608336 | 7.369381487 | 0.003662537 | FBgn0027866 |
| GB55837 | -1.509197577 | 7.873245418 | 0.003623868 | FBgn0032940 |
| GB51759 | -1.509675644 | 7.416382189 | 0.003719881 | FBgn0032601 |
| GB46543 | -1.514717415 | 5.717818433 | 0.002845354 | FBgn0051216 |
| GB48065 | -1.51867425  | 5.766050406 | 0.00252838  | FBgn0250833 |
| GB54551 | -1.520850657 | 5.804920275 | 0.001823125 | FBgn0259677 |
| GB42482 | -1.525659877 | 6.463668869 | 0.003792644 | FBgn0028670 |
| GB42374 | -1.526458619 | 6.982310723 | 0.002459476 | FBgn0023458 |
| GB50257 | -1.529510399 | 5.921754009 | 0.001297043 | FBgn0002577 |
| GB50179 | -1.530585974 | 5.3760793   | 0.010334081 | FBgn0005558 |
| GB49967 | -1.532650059 | 5.398637468 | 0.007913708 | FBgn0029155 |
| GB44831 | -1.534746608 | 4.810243654 | 0.025109919 | FBgn0038632 |
| GB44893 | -1.538174139 | 4.970473581 | 0.016477455 | FBgn0033582 |
| GB55388 | -1.538300084 | 7.106344678 | 0.002602132 | FBgn0033763 |
| GB47305 | -1.542489926 | 5.695388894 | 0.001993687 | FBgn0003742 |
| GB50681 | -1.544661095 | 5.51841992  | 0.003470675 | FBgn0037855 |
| GB45632 | -1.545766042 | 5.164450714 | 0.012641556 | FBgn0033749 |
| GB44368 | -1.54966328  | 5.860149251 | 0.001459929 | FBgn0052699 |
| GB51481 | -1.552430066 | 6.886386934 | 0.002373109 | FBgn0031464 |
| GB44134 | -1.557095613 | 8.94740666  | 0.008332095 | FBgn0003888 |
| GB46282 | -1.55775342  | 6.394612301 | 0.000913961 | FBgn0027587 |
| GB45372 | -1.559334505 | 6.009168896 | 0.000980113 | FBgn0031821 |
| GB50677 | -1.561380741 | 6.521445834 | 0.003229088 | FBgn0035085 |
| GB43693 | -1.564156677 | 5.802218365 | 0.001468575 | FBgn0036910 |
| GB44570 | -1.568279812 | 8.654331652 | 0.004388006 | FBgn0037447 |
| GB43228 | -1.570402464 | 6.066143864 | 0.00044164  | FBgn0035372 |



|         |              |             |             |             |
|---------|--------------|-------------|-------------|-------------|
| GB41850 | -1.573040255 | 5.886302187 | 0.001291197 | FBgn0029167 |
| GB48355 | -1.573234145 | 7.370430859 | 0.001721586 | FBgn0031857 |
| GB41989 | -1.573390436 | 5.797022365 | 0.002622077 | FBgn0033661 |
| GB49328 | -1.573431951 | 6.946149191 | 0.0018063   | FBgn0033464 |
| GB41773 | -1.575937093 | 9.820961935 | 0.003289094 | FBgn0024989 |
| GB55640 | -1.576088607 | 4.927961949 | 0.011095962 | FBgn0034500 |
| GB49845 | -1.576647145 | 8.959146589 | 0.002218882 | FBgn0001311 |
| GB43230 | -1.582890462 | 5.643228474 | 0.001870292 | FBgn0001253 |
| GB41908 | -1.582910529 | 6.98898126  | 0.001688629 | FBgn0039936 |
| GB52997 | -1.585026847 | 7.628021348 | 0.001989616 | FBgn0262110 |
| GB43946 | -1.591024276 | 5.273820994 | 0.00560765  | FBgn0036483 |
| GB46338 | -1.593303257 | 5.009111543 | 0.012100079 | FBgn0043550 |
| GB55298 | -1.596894338 | 5.542591537 | 0.002583969 | FBgn0011227 |
| GB55481 | -1.600874272 | 6.055058845 | 0.000542938 | FBgn0001991 |
| GB41659 | -1.605056253 | 5.454523686 | 0.004219619 | FBgn0031081 |
| GB44253 | -1.608824943 | 5.910778015 | 0.001037233 | FBgn0029881 |
| GB49562 | -1.610289784 | 5.340796068 | 0.007340172 | FBgn0001186 |
| GB49282 | -1.613159497 | 4.935703385 | 0.014333012 | FBgn0025624 |
| GB54692 | -1.613161022 | 6.243686557 | 0.000482801 | FBgn0037622 |
| GB50847 | -1.613788582 | 6.411737417 | 0.000543771 | FBgn0030093 |
| GB45970 | -1.616233999 | 5.097091194 | 0.010714979 | FBgn0015609 |
| GB43366 | -1.629143426 | 4.873967175 | 0.015747903 | FBgn0051663 |
| GB47905 | -1.635874455 | 6.00895751  | 0.000457125 | FBgn0033205 |
| GB46626 | -1.636890805 | 5.615132809 | 0.003258694 | FBgn0035199 |
| GB44811 | -1.636995039 | 5.246490849 | 0.005592885 | FBgn0261555 |
| GB48578 | -1.643806537 | 4.907908958 | 0.010066785 | FBgn0011297 |
| GB54150 | -1.646219975 | 6.089724402 | 0.000381498 | FBgn0039061 |
| GB53578 | -1.649999835 | 4.815302994 | 0.016540525 | FBgn0051414 |
| GB45212 | -1.65933401  | 6.570387762 | 0.000328698 | FBgn0039187 |
| GB48254 | -1.662186716 | 7.794124195 | 0.00155009  | FBgn0003174 |
| GB52740 | -1.667107567 | 5.060358833 | 0.007969715 | FBgn0039224 |
| GB52768 | -1.668374401 | 5.799479922 | 0.000692963 | FBgn0032779 |
| GB50558 | -1.674171856 | 6.170840971 | 0.000324707 | FBgn0036135 |
| GB46448 | -1.675445719 | 5.756480945 | 0.001182561 | FBgn0037203 |
| GB50655 | -1.677750533 | 4.551749544 | 0.021636336 | FBgn0034364 |
| GB41701 | -1.678795021 | 6.856045931 | 0.000613173 | FBgn0050122 |
| GB45153 | -1.679887072 | 7.949860667 | 0.001046418 | FBgn0031771 |
| GB49533 | -1.680756303 | 6.486327636 | 0.000235333 | FBgn0033109 |
| GB51422 | -1.681337655 | 5.716344828 | 0.001178378 | FBgn0035799 |
| GB41366 | -1.683094434 | 6.780122962 | 0.001182561 | FBgn0053196 |
| GB55480 | -1.683411075 | 5.215716361 | 0.005945144 | FBgn0001991 |
| GB43584 | -1.685178481 | 4.550313607 | 0.024492936 | FBgn0036433 |
| GB43611 | -1.68984253  | 6.86093741  | 0.000639953 | FBgn0263705 |
| GB40305 | -1.690517245 | 7.829225721 | 0.00139163  | FBgn0039909 |
| GB43890 | -1.690666134 | 6.40494113  | 0.001106408 | FBgn0033431 |
| GB41680 | -1.693868841 | 7.538595326 | 0.000662249 | FBgn0034975 |
| GB47199 | -1.695935405 | 6.193047004 | 0.000775532 | FBgn0010222 |
| GB42840 | -1.696627269 | 7.615187962 | 0.000819164 | FBgn0032305 |
| GB44868 | -1.696935476 | 5.266186847 | 0.00567286  | FBgn0250862 |
| GB45540 | -1.697728804 | 6.564259474 | 0.000456782 | FBgn0000097 |
| GB40703 | -1.697981042 | 8.312923646 | 0.000882379 | FBgn0036715 |
| GB55744 | -1.698554326 | 4.853713494 | 0.01141311  | FBgn0035260 |
| GB43214 | -1.699108369 | 5.294543729 | 0.004165578 | FBgn0013811 |
| GB50954 | -1.69975637  | 5.157621896 | 0.005066367 | FBgn0053988 |
| GB48362 | -1.701689148 | 5.221609729 | 0.005304666 | FBgn0000489 |
| GB41609 | -1.701929554 | 6.154848836 | 0.000352919 | FBgn0030631 |

|         |              |             |             |             |
|---------|--------------|-------------|-------------|-------------|
| GB46431 | -1.701996264 | 7.466872912 | 0.000692386 | FBgn0037249 |
| GB54693 | -1.710331323 | 6.883763616 | 0.000545486 | FBgn0038924 |
| GB54685 | -1.710742073 | 5.243160247 | 0.002448367 | FBgn0039356 |
| GB42557 | -1.711029539 | 6.25895522  | 0.000275746 | FBgn0039203 |
| GB55911 | -1.718962886 | 6.7728769   | 0.000866506 | FBgn0026059 |
| GB47779 | -1.719008215 | 5.602353074 | 0.000925908 | FBgn0032797 |
| GB56009 | -1.72075281  | 5.595587466 | 0.000773245 | FBgn0000182 |
| GB44912 | -1.725029486 | 5.115081819 | 0.004913706 | FBgn0002441 |
| GB49325 | -1.725079898 | 6.069244233 | 0.000245268 | FBgn0011604 |
| GB43143 | -1.725823736 | 6.137362037 | 0.000200251 | FBgn0033495 |
| GB45265 | -1.726785506 | 6.984567288 | 0.001253475 | FBgn0033484 |
| GB50586 | -1.727760627 | 7.093594418 | 0.00050546  | FBgn0003319 |
| GB50683 | -1.728949236 | 8.038790092 | 0.000586843 | FBgn0037855 |
| GB53670 | -1.729262213 | 7.215149763 | 0.000958404 | FBgn0034087 |
| GB53716 | -1.731838027 | 5.957009581 | 0.000310234 | FBgn0033887 |
| GB42652 | -1.733858067 | 8.360669288 | 0.003297569 | FBgn0034603 |
| GB55808 | -1.737203295 | 7.863294857 | 0.00056252  | FBgn0020306 |
| GB42015 | -1.737569039 | 6.169895059 | 0.000304616 | FBgn0037838 |
| GB52979 | -1.739805394 | 5.618867556 | 0.000508522 | FBgn0037757 |
| GB46157 | -1.748066396 | 4.370584254 | 0.030753457 | FBgn0259167 |
| GB51768 | -1.756787289 | 7.138737538 | 0.000546836 | FBgn0036333 |
| GB48162 | -1.759323003 | 5.584285623 | 0.00055173  | FBgn0028879 |
| GB49764 | -1.759970667 | 6.738671201 | 0.000547902 | FBgn0261277 |
| GB52252 | -1.762415907 | 7.755704951 | 0.000448386 | FBgn0031107 |
| GB44685 | -1.7718009   | 7.204557118 | 0.000399479 | FBgn0038532 |
| GB50245 | -1.772034699 | 6.443158495 | 0.000530088 | FBgn0263109 |
| GB40615 | -1.774730034 | 5.29869011  | 0.001605539 | FBgn0039178 |
| GB55425 | -1.777929161 | 5.078421259 | 0.003835155 | FBgn0013984 |
| GB55356 | -1.779187535 | 6.926704729 | 0.000289206 | FBgn0029835 |
| GB43456 | -1.78034967  | 6.265156054 | 0.000267501 | FBgn0034476 |
| GB53657 | -1.782108033 | 6.814626799 | 0.000245268 | FBgn0037093 |
| GB54397 | -1.785428479 | 5.00025246  | 0.005016816 | FBgn0038986 |
| GB49977 | -1.788529061 | 7.344054144 | 0.000328698 | FBgn0039709 |
| GB42484 | -1.788941502 | 7.150225215 | 0.000330188 | FBgn0039640 |
| GB43304 | -1.792236133 | 7.033678736 | 0.000262866 | FBgn0037963 |
| GB48948 | -1.793415005 | 6.374378139 | 0.000145343 | FBgn0032649 |
| GB42052 | -1.795674235 | 4.631935187 | 0.01365845  | FBgn0262112 |
| GB43114 | -1.799933131 | 5.718398983 | 0.000233123 | FBgn0030508 |
| GB43123 | -1.801909847 | 9.638728478 | 0.000480347 | FBgn0263132 |
| GB55495 | -1.803351599 | 5.247369341 | 0.002603591 | FBgn0053653 |
| GB41849 | -1.809167051 | 4.869278802 | 0.004138696 | FBgn0054056 |
| GB54996 | -1.810711366 | 5.438969828 | 0.001046418 | FBgn0040849 |
| GB46902 | -1.811604489 | 6.073549098 | 9.01187E-05 | FBgn0035146 |
| GB50101 | -1.812149096 | 7.322015625 | 0.000254117 | FBgn0039594 |
| GB41290 | -1.814352865 | 6.727352358 | 0.000245268 | FBgn0051224 |
| GB42793 | -1.816314492 | 4.293982815 | 0.030127865 | FBgn0038294 |
| GB44254 | -1.816868908 | 7.59974148  | 0.00033882  | FBgn0029881 |
| GB50061 | -1.818420171 | 7.480552425 | 0.000286816 | FBgn0001321 |
| GB45972 | -1.81852511  | 6.830636257 | 0.00136475  | FBgn0015609 |
| GB40344 | -1.819495587 | 4.665795644 | 0.009981156 | FBgn0039655 |
| GB47274 | -1.822832473 | 5.578657087 | 0.000376795 | FBgn0027556 |
| GB47082 | -1.822866754 | 4.689665037 | 0.004946799 | FBgn0030660 |
| GB55843 | -1.826270481 | 6.080908557 | 8.01085E-05 | FBgn0035253 |
| GB55274 | -1.832369157 | 7.049445609 | 0.000176844 | FBgn0026374 |
| GB41900 | -1.839724844 | 6.231425685 | 7.07022E-05 | FBgn0259110 |
| GB47451 | -1.843730071 | 5.603172502 | 0.000261925 | FBgn0033633 |

|         |              |             |             |             |
|---------|--------------|-------------|-------------|-------------|
| GB45152 | -1.846087486 | 11.15578654 | 0.000280744 | FBgn0261341 |
| GB51104 | -1.847201908 | 9.200854437 | 0.00027463  | FBgn0028371 |
| GB45852 | -1.847993658 | 6.099417061 | 4.33761E-05 | FBgn0050021 |
| GB50769 | -1.848982917 | 6.265326287 | 5.11189E-05 | FBgn0000008 |
| GB45551 | -1.865392373 | 4.58752685  | 0.010078381 | FBgn0259923 |
| GB40405 | -1.871170609 | 6.963984187 | 0.000130374 | FBgn0003159 |
| GB51774 | -1.872314832 | 4.341144282 | 0.020469687 | FBgn0039536 |
| GB52759 | -1.88880347  | 5.386452165 | 0.00071788  | FBgn0029834 |
| GB51068 | -1.889578892 | 5.314139586 | 0.00121524  | FBgn0000121 |
| GB49616 | -1.893444106 | 4.592893539 | 0.013542361 | FBgn0263132 |
| GB45111 | -1.894653149 | 5.747040217 | 7.76241E-05 | FBgn0010772 |
| GB43613 | -1.903666381 | 6.876165231 | 0.000101899 | FBgn0263705 |
| GB49262 | -1.905337046 | 8.109968957 | 0.000108666 | FBgn0262526 |
| GB49095 | -1.916347428 | 6.649063506 | 0.00010743  | FBgn0062413 |
| GB44187 | -1.928145804 | 5.42372913  | 0.000280744 | FBgn0028387 |
| GB54362 | -1.934287969 | 5.772770005 | 5.60679E-05 | FBgn0033633 |
| GB48497 | -1.938355015 | 7.973610186 | 0.00013272  | FBgn0010470 |
| GB46165 | -1.938945193 | 5.339008636 | 0.001204284 | FBgn0010389 |
| GB46680 | -1.939058195 | 5.668059993 | 8.07642E-05 | FBgn0031849 |
| GB44426 | -1.939646145 | 6.161894911 | 4.04826E-05 | FBgn0037537 |
| GB49283 | -1.948060348 | 6.397169321 | 0.000445327 | FBgn0036398 |
| GB48577 | -1.949347532 | 6.686311511 | 8.56171E-05 | FBgn0001083 |
| GB43953 | -1.950016058 | 6.471806348 | 1.87982E-05 | FBgn0023094 |
| GB51338 | -1.954304187 | 4.267178431 | 0.017306479 | FBgn0262110 |
| GB41746 | -1.955338532 | 6.351120898 | 1.827E-05   | FBgn0011592 |
| GB48454 | -1.956593242 | 8.174013948 | 7.7554E-05  | FBgn0000108 |
| GB45681 | -1.964745429 | 6.843430635 | 0.000130374 | FBgn0010470 |
| GB52097 | -1.966638059 | 5.150922886 | 0.001515217 | FBgn0058006 |
| GB47678 | -1.967429559 | 5.745832466 | 0.000104801 | FBgn0035179 |
| GB55395 | -1.975832677 | 5.589164134 | 9.06634E-05 | FBgn0029837 |
| GB42447 | -1.977747233 | 4.674058735 | 0.00560765  | FBgn0024998 |
| GB47949 | -1.980380097 | 6.26845247  | 1.24049E-05 | FBgn0013988 |
| GB40808 | -1.984366235 | 7.722928131 | 5.56797E-05 | FBgn0029688 |
| GB49730 | -1.987540396 | 4.689947536 | 0.004989102 | FBgn0262562 |
| GB53933 | -1.990205122 | 6.635786941 | 5.99861E-05 | FBgn0038799 |
| GB52910 | -1.991662135 | 4.987628188 | 0.002710777 | FBgn0024944 |
| GB45932 | -1.992244003 | 5.258533534 | 0.000410877 | FBgn0020440 |
| GB52937 | -2.00121177  | 5.176790706 | 0.001577538 | FBgn0000287 |
| GB55275 | -2.00550904  | 7.602960354 | 5.11189E-05 | FBgn0036289 |
| GB51814 | -2.007318168 | 5.258986643 | 0.000937743 | FBgn0001112 |
| GB50003 | -2.00945882  | 5.254912371 | 0.001191877 | FBgn0260964 |
| GB47845 | -2.012554638 | 5.191634162 | 0.000561827 | FBgn0037212 |
| GB43054 | -2.017111428 | 7.490179027 | 6.469E-05   | FBgn0261259 |
| GB52194 | -2.018421065 | 5.09532258  | 0.001136596 | FBgn0016075 |
| GB44661 | -2.02436432  | 6.792116003 | 4.04826E-05 | FBgn0259173 |
| GB40010 | -2.02974635  | 8.739768387 | 6.86688E-05 | FBgn0261836 |
| GB42676 | -2.035154667 | 5.03979218  | 0.001194919 | FBgn0033769 |
| GB55328 | -2.036646548 | 8.155736417 | 6.469E-05   | FBgn0003721 |
| GB40445 | -2.041023143 | 9.649677948 | 4.17707E-05 | FBgn0031918 |
| GB41625 | -2.047772287 | 8.738462402 | 4.18903E-05 | FBgn0035844 |
| GB45484 | -2.050106095 | 6.32301766  | 1.35264E-05 | FBgn0037447 |
| GB56032 | -2.056953903 | 4.34681506  | 0.009981156 | FBgn0034013 |
| GB52014 | -2.058536762 | 5.383709453 | 0.000295092 | FBgn0000299 |
| GB46268 | -2.06132706  | 8.481130058 | 3.30966E-05 | FBgn0024183 |
| GB43084 | -2.062450179 | 6.66493838  | 4.1552E-05  | FBgn0035238 |
| GB43137 | -2.06314468  | 5.154324951 | 0.000493239 | FBgn0261873 |

|         |              |             |             |             |
|---------|--------------|-------------|-------------|-------------|
| GB49930 | -2.066238868 | 6.663242543 | 2.49775E-05 | FBgn0028491 |
| GB50953 | -2.066589113 | 5.461614851 | 0.000123531 | FBgn0053988 |
| GB54144 | -2.069489405 | 6.078120028 | 0.000462688 | FBgn0259233 |
| GB55615 | -2.071922208 | 7.847714442 | 8.19374E-05 | FBgn0034860 |
| GB53012 | -2.073314241 | 5.835883639 | 1.50624E-05 | FBgn0010473 |
| GB48813 | -2.079086613 | 6.845869219 | 0.001998484 | FBgn0066365 |
| GB41372 | -2.079431145 | 5.996318533 | 5.20443E-06 | FBgn0038641 |
| GB47349 | -2.082447124 | 6.075243597 | 5.08598E-06 | FBgn0036298 |
| GB43586 | -2.087778622 | 4.515947479 | 0.004757278 | FBgn0034942 |
| GB50690 | -2.093298984 | 7.211588512 | 2.39852E-05 | FBgn0261397 |
| GB52925 | -2.095079053 | 6.285389589 | 5.98745E-06 | FBgn0086911 |
| GB46297 | -2.095658826 | 10.88557352 | 6.08407E-05 | FBgn0035736 |
| GB52955 | -2.099735175 | 6.652699487 | 5.91783E-05 | FBgn0051559 |
| GB54893 | -2.100307136 | 6.145692218 | 2.65826E-06 | FBgn0031251 |
| GB50753 | -2.106002637 | 6.182359294 | 2.55746E-06 | FBgn0028474 |
| GB43552 | -2.106654816 | 6.845249277 | 3.85966E-05 | FBgn0035575 |
| GB47938 | -2.111739877 | 8.991316647 | 1.79932E-05 | FBgn0031879 |
| GB54347 | -2.112634183 | 6.81949494  | 7.05154E-05 | FBgn0259734 |
| GB40993 | -2.11437622  | 5.720206926 | 8.28101E-05 | FBgn0038247 |
| GB40203 | -2.116183164 | 7.415689167 | 1.7022E-05  | FBgn0051028 |
| GB42904 | -2.120023241 | 6.491512321 | 8.02995E-06 | FBgn0262681 |
| GB55895 | -2.13193111  | 4.734181793 | 0.000561827 | FBgn0040705 |
| GB46221 | -2.135137446 | 4.677159315 | 0.002567827 | FBgn0259167 |
| GB50507 | -2.13724668  | 4.407792504 | 0.006619421 | FBgn0261514 |
| GB51511 | -2.140277376 | 6.089645958 | 2.01795E-06 | FBgn0261261 |
| GB46145 | -2.141146371 | 4.412323488 | 0.007568298 | FBgn0032946 |
| GB42653 | -2.143456457 | 7.420499792 | 9.73307E-06 | FBgn0011288 |
| GB55241 | -2.149547345 | 6.327513745 | 2.31614E-06 | FBgn0030685 |
| GB40694 | -2.1496155   | 4.256526106 | 0.008332095 | FBgn0037153 |
| GB50672 | -2.161644388 | 7.626753766 | 2.89004E-05 | FBgn0086736 |
| GB50891 | -2.166604974 | 6.520065814 | 2.32477E-06 | FBgn0034716 |
| GB46663 | -2.170247952 | 4.101046071 | 0.011854996 | FBgn0032506 |
| GB54538 | -2.170967828 | 6.359411674 | 5.68892E-06 | FBgn0262870 |
| GB46274 | -2.172398924 | 7.369278126 | 4.66435E-05 | FBgn0030648 |
| GB53116 | -2.174127406 | 5.038185976 | 0.002602132 | FBgn0086911 |
| GB42130 | -2.176000884 | 4.600941219 | 0.002759017 | FBgn0028371 |
| GB54416 | -2.176466107 | 4.958692479 | 0.000612891 | FBgn0030613 |
| GB43602 | -2.180858949 | 5.306047884 | 0.000278752 | FBgn0052082 |
| GB54868 | -2.182396527 | 4.733764146 | 0.001486986 | FBgn0031426 |
| GB45115 | -2.186968958 | 4.943058391 | 0.000933504 | FBgn0050468 |
| GB42350 | -2.197090557 | 5.166313997 | 0.000217148 | FBgn0029807 |
| GB45218 | -2.200131594 | 5.238996109 | 0.000250903 | FBgn0035056 |
| GB41731 | -2.201588781 | 5.17122647  | 0.000249244 | FBgn0262636 |
| GB51063 | -2.205060106 | 8.654923254 | 4.19499E-05 | FBgn0051973 |
| GB46015 | -2.210543373 | 5.182687198 | 0.000168292 | FBgn0033753 |
| GB40106 | -2.212639966 | 5.447241774 | 2.89502E-05 | FBgn0264672 |
| GB43612 | -2.230123011 | 6.153245882 | 6.041E-07   | FBgn0263705 |
| GB55545 | -2.231799506 | 5.088686382 | 0.000612891 | FBgn0031860 |
| GB40671 | -2.234766172 | 5.465346385 | 1.96409E-05 | FBgn0011592 |
| GB50085 | -2.23726162  | 4.163974657 | 0.006616969 | FBgn0052736 |
| GB40263 | -2.239323281 | 7.218582838 | 4.39072E-06 | 0           |
| GB46164 | -2.242640553 | 4.474802742 | 0.005703211 | FBgn0010389 |
| GB40810 | -2.243092865 | 4.801513323 | 0.000422028 | FBgn0035805 |
| GB49870 | -2.250118287 | 6.789831919 | 4.12352E-06 | FBgn0036821 |
| GB48576 | -2.258255905 | 6.793045747 | 1.2235E-05  | FBgn0031879 |
| GB53651 | -2.259520049 | 4.922550459 | 0.000365369 | FBgn0011676 |

|         |              |             |             |             |
|---------|--------------|-------------|-------------|-------------|
| GB49767 | -2.262595692 | 4.344848219 | 0.006409526 | FBgn0263219 |
| GB41863 | -2.264833895 | 5.4035996   | 3.97299E-05 | FBgn0029830 |
| GB50295 | -2.272532851 | 6.654831993 | 2.13391E-06 | FBgn0031879 |
| GB50207 | -2.273646693 | 3.964789607 | 0.014383808 | FBgn0036542 |
| GB55483 | -2.276427974 | 8.749898958 | 1.92736E-05 | FBgn0005666 |
| GB41203 | -2.287525653 | 10.56775492 | 1.8716E-05  | FBgn0026077 |
| GB43941 | -2.297025462 | 7.035096273 | 1.95633E-06 | FBgn0031195 |
| GB50538 | -2.298544107 | 5.168727036 | 9.50579E-05 | FBgn0263986 |
| GB54643 | -2.299557762 | 7.695623788 | 5.99602E-06 | FBgn0019960 |
| GB55781 | -2.299762327 | 8.664586283 | 5.24693E-06 | FBgn0053196 |
| GB42866 | -2.303683509 | 4.696166499 | 0.00134622  | FBgn0259246 |
| GB43543 | -2.304189831 | 4.801124129 | 0.001210738 | FBgn0024963 |
| GB42796 | -2.310787373 | 5.939130698 | 4.70241E-06 | FBgn0250839 |
| GB48837 | -2.312959031 | 8.553508385 | 5.68892E-06 | FBgn0039008 |
| GB46886 | -2.314202596 | 5.182144424 | 8.75767E-05 | FBgn0010399 |
| GB49534 | -2.316491814 | 9.609727552 | 2.93403E-06 | FBgn0027341 |
| GB49106 | -2.31720257  | 8.767852443 | 2.63884E-06 | FBgn0250789 |
| GB49543 | -2.33064748  | 4.576428615 | 0.002857007 | FBgn0036381 |
| GB41270 | -2.33123855  | 9.580151452 | 5.62231E-06 | FBgn0026077 |
| GB42976 | -2.337849669 | 5.887214947 | 9.5281E-07  | FBgn0004449 |
| GB43163 | -2.343741916 | 6.511168113 | 1.46767E-06 | FBgn0027503 |
| GB48062 | -2.351353277 | 5.476878462 | 9.69932E-06 | FBgn0033702 |
| GB44209 | -2.359233013 | 7.754747995 | 7.87753E-06 | FBgn0037537 |
| GB51722 | -2.359486556 | 7.137604465 | 3.33905E-06 | FBgn0035936 |
| GB47974 | -2.371956632 | 6.061179065 | 1.24084E-05 | FBgn0015575 |
| GB45140 | -2.373238941 | 5.127269971 | 7.80932E-05 | FBgn0032129 |
| GB44315 | -2.375423476 | 4.275921013 | 0.003320369 | FBgn0033095 |
| GB42644 | -2.376208112 | 4.052005571 | 0.008882024 | FBgn0000039 |
| GB44949 | -2.38098485  | 4.626421768 | 0.000768331 | FBgn0037368 |
| GB54213 | -2.382004933 | 7.230130452 | 3.41534E-06 | FBgn0052000 |
| GB51090 | -2.38226148  | 4.454332747 | 0.002004696 | FBgn0035917 |
| GB40231 | -2.392324407 | 4.275435366 | 0.003650816 | FBgn0259244 |
| GB49726 | -2.395408482 | 6.243943698 | 2.40081E-07 | FBgn0003137 |
| GB48727 | -2.400814278 | 3.822892409 | 0.015326511 | FBgn0000560 |
| GB47595 | -2.406632745 | 3.8209395   | 0.014261774 | FBgn0033654 |
| GB50564 | -2.409185095 | 6.492339343 | 0.000512798 | FBgn0027527 |
| GB50091 | -2.410323288 | 5.0402493   | 9.6708E-05  | FBgn0003499 |
| GB41855 | -2.415670353 | 6.962327291 | 1.01918E-06 | FBgn0262867 |
| GB41888 | -2.420408994 | 6.708134759 | 7.91433E-07 | FBgn0036398 |
| GB54127 | -2.420978928 | 4.800635021 | 0.000407462 | FBgn0003353 |
| GB47496 | -2.422445342 | 4.501668786 | 0.0008941   | FBgn0039667 |
| GB55556 | -2.423948662 | 3.835242193 | 0.013724739 | FBgn0038921 |
| GB49184 | -2.427798537 | 5.45175979  | 8.71009E-06 | FBgn0032749 |
| GB42378 | -2.438811028 | 6.175697042 | 3.01057E-06 | FBgn0261799 |
| GB46701 | -2.439367284 | 6.806500636 | 7.30809E-07 | FBgn0051204 |
| GB54390 | -2.442173205 | 6.730119825 | 6.79087E-07 | FBgn0025393 |
| GB40074 | -2.443895641 | 4.117068322 | 0.005319708 | FBgn0014859 |
| GB41670 | -2.449160209 | 6.636483565 | 1.13613E-06 | FBgn0010497 |
| GB54483 | -2.455635423 | 7.178253526 | 7.43515E-07 | FBgn0035539 |
| GB42411 | -2.467320228 | 4.144154605 | 0.003627822 | FBgn0034636 |
| GB45937 | -2.475314827 | 8.037460993 | 4.814E-07   | FBgn0013765 |
| GB41861 | -2.478265786 | 6.431110093 | 1.32551E-07 | FBgn0053196 |
| GB42884 | -2.482837922 | 4.700907011 | 0.000382292 | FBgn0051146 |
| GB46699 | -2.48810559  | 5.126330017 | 0.000919202 | FBgn0263077 |
| GB47513 | -2.493871181 | 5.333031228 | 8.19462E-06 | FBgn0000448 |
| GB50567 | -2.495591466 | 6.304960535 | 1.64976E-06 | FBgn0037416 |

|         |              |             |             |             |
|---------|--------------|-------------|-------------|-------------|
| GB52447 | -2.513341232 | 5.117873254 | 4.33761E-05 | FBgn0036780 |
| GB42804 | -2.515105363 | 8.134492831 | 2.55397E-07 | FBgn0033192 |
| GB50228 | -2.520844625 | 4.394078858 | 0.001538639 | FBgn0039048 |
| GB42239 | -2.525504795 | 7.285804815 | 4.07168E-07 | FBgn0034943 |
| GB40393 | -2.527549074 | 6.060629954 | 4.11362E-05 | FBgn0032211 |
| GB52446 | -2.531282887 | 6.556572881 | 9.86775E-07 | FBgn0020300 |
| GB54926 | -2.539439336 | 3.639640812 | 0.016843765 | FBgn0036369 |
| GB42612 | -2.545812735 | 8.913669464 | 4.80354E-07 | FBgn0033603 |
| GB44939 | -2.550219791 | 3.954498748 | 0.006875384 | FBgn0026439 |
| GB43198 | -2.553961921 | 8.213643431 | 9.53177E-07 | FBgn0000667 |
| GB43231 | -2.555956898 | 7.21338108  | 1.21689E-06 | FBgn0035888 |
| GB46077 | -2.55599842  | 4.926770736 | 7.74226E-05 | FBgn0030729 |
| GB46368 | -2.560571109 | 5.282438473 | 1.14899E-05 | FBgn0011693 |
| GB54076 | -2.563901244 | 6.575838749 | 1.696E-06   | FBgn0032785 |
| GB41862 | -2.564779429 | 5.373726542 | 1.05445E-05 | FBgn0259680 |
| GB41662 | -2.565617167 | 3.669773555 | 0.014155874 | FBgn0027548 |
| GB46188 | -2.577972002 | 4.7914217   | 0.000208313 | FBgn0085425 |
| GB43812 | -2.578530085 | 3.677458268 | 0.012314163 | FBgn0035192 |
| GB55559 | -2.579587104 | 5.194076402 | 2.32394E-05 | FBgn0033679 |
| GB42823 | -2.587271404 | 5.808906127 | 3.2383E-07  | FBgn0036180 |
| GB41260 | -2.60628321  | 5.309155936 | 6.83392E-06 | FBgn0259247 |
| GB50150 | -2.610315604 | 3.699967163 | 0.012746549 | FBgn0033958 |
| GB49104 | -2.617253247 | 4.231217066 | 0.003090902 | FBgn0000567 |
| GB43205 | -2.618146071 | 5.753631578 | 5.60513E-07 | FBgn0032598 |
| GB42487 | -2.620286575 | 7.274878873 | 8.59987E-08 | FBgn0260450 |
| GB54313 | -2.620710311 | 6.54186644  | 3.40745E-08 | FBgn0030884 |
| GB46151 | -2.622119247 | 5.19853514  | 3.44763E-05 | FBgn0082585 |
| GB44842 | -2.6272153   | 6.847246177 | 6.0668E-08  | FBgn0082582 |
| GB53064 | -2.628168553 | 6.689134878 | 1.69752E-06 | FBgn0010482 |
| GB40969 | -2.629764001 | 4.259899943 | 0.00161421  | FBgn0035711 |
| GB51442 | -2.63410931  | 6.812412596 | 2.12724E-06 | FBgn0052036 |
| GB54743 | -2.638255677 | 5.939595771 | 2.09661E-08 | FBgn0004959 |
| GB55912 | -2.640877909 | 7.870578396 | 5.44574E-08 | FBgn0026059 |
| GB47869 | -2.64627801  | 4.298180072 | 0.001012482 | FBgn0037448 |
| GB55359 | -2.646318875 | 7.67997007  | 1.54263E-07 | FBgn0036365 |
| GB41684 | -2.653632921 | 4.866929648 | 5.72488E-05 | FBgn0031730 |
| GB50262 | -2.654074489 | 5.137562131 | 1.02544E-05 | FBgn0034911 |
| GB50453 | -2.666775497 | 6.099327975 | 1.21104E-08 | FBgn0039805 |
| GB46113 | -2.672277662 | 5.670078574 | 1.15053E-07 | FBgn0053143 |
| GB44548 | -2.680605707 | 5.715926808 | 8.40508E-07 | FBgn0001112 |
| GB49809 | -2.685032361 | 5.160591328 | 9.32217E-06 | FBgn0040351 |
| GB45235 | -2.695929701 | 5.16790519  | 1.53027E-05 | FBgn0052432 |
| GB46817 | -2.707420772 | 9.562987392 | 4.75014E-06 | FBgn0053257 |
| GB53675 | -2.709033224 | 4.773596928 | 2.49689E-05 | FBgn0031999 |
| GB53970 | -2.713222161 | 8.369231916 | 4.10233E-08 | FBgn0035574 |
| GB47004 | -2.717709681 | 4.913209433 | 6.57372E-05 | FBgn0031849 |
| GB49785 | -2.720799553 | 4.75355083  | 9.74019E-05 | FBgn0026438 |
| GB42296 | -2.729945999 | 5.434107509 | 1.41941E-06 | FBgn0038511 |
| GB50866 | -2.732768107 | 7.834901445 | 1.82702E-08 | FBgn0010435 |
| GB46597 | -2.734725565 | 5.726054653 | 3.13702E-08 | FBgn0013953 |
| GB51744 | -2.742406599 | 3.822851732 | 0.006741597 | FBgn0032338 |
| GB54136 | -2.7575608   | 5.196629564 | 9.49943E-06 | FBgn0264272 |
| GB46302 | -2.760994474 | 4.603189428 | 0.000202064 | FBgn0262738 |
| GB44316 | -2.761589269 | 5.100589726 | 1.03083E-05 | FBgn0033095 |
| GB47971 | -2.769448048 | 5.986519413 | 1.47678E-08 | FBgn0033917 |
| GB55939 | -2.773370514 | 3.470610601 | 0.012568344 | FBgn0040373 |

|         |              |             |             |             |
|---------|--------------|-------------|-------------|-------------|
| GB45919 | -2.774046973 | 4.957221174 | 2.50472E-05 | FBgn0259164 |
| GB55765 | -2.776931202 | 6.557191525 | 7.92015E-08 | FBgn0000442 |
| GB50013 | -2.790943119 | 5.094405823 | 1.56386E-05 | FBgn0036891 |
| GB45841 | -2.793141212 | 3.864969012 | 0.005163309 | FBgn0263239 |
| GB44560 | -2.795977474 | 5.780662228 | 1.47678E-08 | FBgn0003149 |
| GB40412 | -2.804949919 | 4.170956112 | 0.001182561 | FBgn0051475 |
| GB42493 | -2.807723943 | 7.166267125 | 4.59623E-08 | FBgn0028573 |
| GB44223 | -2.808192867 | 7.402595059 | 2.31428E-07 | FBgn0027611 |
| GB46062 | -2.809663868 | 3.881287253 | 0.003702999 | FBgn0033524 |
| GB52077 | -2.812800381 | 4.442787299 | 0.000246699 | FBgn0003068 |
| GB43932 | -2.817436602 | 3.499336479 | 0.014057918 | FBgn0032506 |
| GB45553 | -2.837134323 | 5.179651875 | 1.03111E-06 | FBgn0034157 |
| GB48234 | -2.846264172 | 4.680203126 | 7.28379E-05 | FBgn0000464 |
| GB40503 | -2.859832692 | 8.44600288  | 7.45758E-09 | FBgn0032350 |
| GB45211 | -2.865658278 | 8.461314388 | 5.85411E-08 | FBgn0010423 |
| GB43718 | -2.868062535 | 5.835016914 | 5.53923E-09 | FBgn0002938 |
| GB42798 | -2.872162524 | 5.95580609  | 1.8716E-05  | FBgn0037288 |
| GB40306 | -2.873348311 | 5.915917049 | 3.24324E-09 | FBgn0010435 |
| GB44962 | -2.879152908 | 3.929239916 | 0.002602132 | FBgn0042696 |
| GB44453 | -2.881508853 | 5.550213499 | 1.16848E-07 | FBgn0032804 |
| GB44961 | -2.88801489  | 3.557102777 | 0.011439352 | FBgn0042696 |
| GB53343 | -2.889573359 | 6.703322685 | 1.19113E-08 | FBgn0043903 |
| GB50590 | -2.891393358 | 5.565245862 | 2.88026E-05 | FBgn0260228 |
| GB53894 | -2.894724435 | 3.963418414 | 0.001596367 | FBgn0028474 |
| GB47972 | -2.901725477 | 3.561823423 | 0.01078842  | FBgn0033917 |
| GB42660 | -2.902883517 | 4.261197648 | 0.000641346 | FBgn0028878 |
| GB41331 | -2.910129686 | 3.980535749 | 0.001194919 | 0           |
| GB51736 | -2.911995172 | 8.402392192 | 7.71033E-09 | FBgn0031957 |
| GB41196 | -2.912559189 | 7.155313032 | 5.14598E-09 | FBgn0023518 |
| GB50007 | -2.915180987 | 4.253090354 | 0.001512742 | FBgn0039858 |
| GB42942 | -2.928761842 | 3.589569467 | 0.011095962 | FBgn0040297 |
| GB52078 | -2.929370617 | 5.255319968 | 4.79876E-07 | FBgn0003068 |
| GB53331 | -2.938154303 | 6.712827601 | 2.44897E-09 | FBgn0039294 |
| GB50648 | -2.939495996 | 5.777115272 | 3.04766E-08 | FBgn0003319 |
| GB47512 | -2.948860591 | 5.107519438 | 4.27993E-06 | FBgn0000448 |
| GB47224 | -2.95108648  | 7.719645545 | 2.98163E-09 | FBgn0000568 |
| GB53319 | -2.951494067 | 7.08454234  | 1.21727E-08 | FBgn0034301 |
| GB41262 | -2.954017282 | 5.592180227 | 1.55172E-07 | FBgn0259247 |
| GB44002 | -2.955571868 | 5.994403051 | 3.7773E-09  | FBgn0000299 |
| GB52036 | -2.964350953 | 5.127349798 | 3.68602E-06 | FBgn0003975 |
| GB46410 | -2.968389493 | 3.59743572  | 0.009240393 | FBgn0000212 |
| GB54921 | -2.979916838 | 6.322017708 | 2.98121E-09 | FBgn0037487 |
| GB48858 | -2.980154647 | 7.559894221 | 1.7364E-08  | FBgn0040601 |
| GB55664 | -2.983259522 | 5.858838241 | 1.18903E-09 | FBgn0051374 |
| GB52028 | -2.9852983   | 9.037545723 | 1.87328E-09 | FBgn0000556 |
| GB55423 | -2.986842601 | 4.336457135 | 0.000240143 | FBgn0036662 |
| GB53163 | -2.999258688 | 4.070189531 | 0.000625287 | FBgn0035113 |
| GB40626 | -3.000600839 | 3.636155542 | 0.006816476 | FBgn0004575 |
| GB52002 | -3.008949311 | 5.439212863 | 2.232E-07   | FBgn0031414 |
| GB46976 | -3.009486316 | 5.838427403 | 1.21458E-05 | FBgn0000451 |
| GB53320 | -3.019587992 | 3.645137563 | 0.005945219 | FBgn0013813 |
| GB45149 | -3.020063745 | 6.605860165 | 3.37997E-08 | FBgn0032785 |
| GB47718 | -3.023414099 | 4.606532237 | 7.13897E-05 | FBgn0023091 |
| GB40842 | -3.027170988 | 7.042735856 | 1.28767E-09 | FBgn0001112 |
| GB42895 | -3.030277255 | 4.840840567 | 1.34339E-05 | FBgn0030716 |
| GB45609 | -3.032665692 | 7.294316613 | 1.79731E-07 | FBgn0033079 |

|         |              |             |             |             |
|---------|--------------|-------------|-------------|-------------|
| GB54818 | -3.038260958 | 7.326876217 | 2.95618E-09 | FBgn0014863 |
| GB44798 | -3.045568798 | 7.63468924  | 6.86218E-10 | FBgn0034797 |
| GB55370 | -3.046896671 | 5.485560635 | 3.25648E-08 | FBgn0025878 |
| GB45364 | -3.046941837 | 6.713696004 | 1.93139E-09 | FBgn0261509 |
| GB44647 | -3.053941933 | 6.41634167  | 1.04587E-10 | FBgn0261999 |
| GB47499 | -3.060260988 | 7.973510911 | 5.10726E-10 | FBgn0085384 |
| GB47838 | -3.060883014 | 8.08435274  | 3.86579E-10 | FBgn0034974 |
| GB49946 | -3.070478444 | 5.337620259 | 3.59238E-07 | FBgn0011653 |
| GB45771 | -3.0858501   | 6.103622752 | 1.54436E-10 | 0           |
| GB55225 | -3.095971529 | 7.272958432 | 4.4126E-10  | FBgn0001083 |
| GB48709 | -3.102188942 | 6.196294826 | 9.84566E-11 | FBgn0033061 |
| GB44110 | -3.119360338 | 5.413588381 | 1.29483E-07 | FBgn0086673 |
| GB50441 | -3.119498522 | 8.161709031 | 1.40988E-08 | FBgn0038405 |
| GB47977 | -3.123774577 | 10.28533363 | 7.95798E-10 | FBgn0086906 |
| GB40009 | -3.12706303  | 4.719576831 | 1.77373E-05 | FBgn0261836 |
| GB49078 | -3.137702477 | 5.128706767 | 2.98459E-07 | FBgn0052645 |
| GB55216 | -3.161541951 | 5.285369534 | 3.92224E-07 | FBgn0039896 |
| GB40446 | -3.164497908 | 6.645400578 | 6.74827E-10 | FBgn0033869 |
| GB55547 | -3.16555119  | 7.624567439 | 3.89229E-08 | FBgn0050172 |
| GB42062 | -3.173992804 | 8.38583813  | 3.355E-09   | FBgn0039527 |
| GB53345 | -3.181444525 | 8.212626461 | 5.48915E-10 | FBgn0037217 |
| GB50000 | -3.181476353 | 8.868521481 | 2.61782E-10 | FBgn0032453 |
| GB43087 | -3.189431735 | 3.266272753 | 0.009564805 | FBgn0035880 |
| GB55986 | -3.201585444 | 4.7333504   | 3.25112E-05 | FBgn0030884 |
| GB54762 | -3.212531047 | 5.135331752 | 1.75464E-06 | FBgn0033362 |
| GB51355 | -3.241408545 | 5.212683856 | 9.7527E-08  | FBgn0052627 |
| GB54775 | -3.241429035 | 8.655641555 | 3.95432E-10 | FBgn0030027 |
| GB45188 | -3.244369679 | 7.328111521 | 6.55002E-11 | FBgn0031630 |
| GB40609 | -3.249393477 | 8.08824625  | 1.18551E-09 | FBgn0039210 |
| GB43983 | -3.259221983 | 6.513294295 | 1.22472E-11 | FBgn0030617 |
| GB41308 | -3.261581469 | 9.024593034 | 2.31228E-10 | FBgn0000046 |
| GB54417 | -3.261931823 | 4.28860968  | 7.30111E-05 | FBgn0026268 |
| GB41730 | -3.262093339 | 3.882081509 | 0.001161445 | FBgn0262636 |
| GB49273 | -3.26739832  | 3.887526185 | 0.001049378 | FBgn0038837 |
| GB52186 | -3.280000296 | 5.091021008 | 5.16702E-08 | FBgn0052808 |
| GB55546 | -3.290437965 | 4.614257227 | 1.46644E-05 | FBgn0039501 |
| GB53736 | -3.293699898 | 3.351168376 | 0.005278769 | FBgn0086913 |
| GB47990 | -3.295593094 | 7.345253542 | 3.86579E-10 | FBgn0004117 |
| GB55613 | -3.298266407 | 5.526298719 | 3.08701E-08 | FBgn0030161 |
| GB47948 | -3.303372991 | 7.112833257 | 2.35403E-10 | FBgn0013988 |
| GB48007 | -3.304029523 | 8.068474651 | 2.39652E-10 | FBgn0034412 |
| GB44777 | -3.307542315 | 8.410463594 | 4.73055E-10 | FBgn0032299 |
| GB49080 | -3.319672502 | 8.234822824 | 3.48163E-10 | FBgn0052645 |
| GB44832 | -3.32169496  | 6.111077774 | 6.27074E-11 | FBgn0038629 |
| GB44723 | -3.342967043 | 4.629824779 | 1.96409E-05 | FBgn0259240 |
| GB40610 | -3.346871447 | 3.400633098 | 0.005098975 | FBgn0036716 |
| GB42485 | -3.355278219 | 5.480863306 | 2.20232E-09 | FBgn0260450 |
| GB42892 | -3.357129016 | 5.326145635 | 1.12416E-08 | FBgn0004650 |
| GB50660 | -3.358081238 | 6.328591752 | 4.75547E-12 | FBgn0036995 |
| GB43500 | -3.35969621  | 3.977231228 | 0.000527406 | FBgn0033196 |
| GB52025 | -3.369708472 | 8.166835967 | 3.28091E-11 | FBgn0027570 |
| GB49734 | -3.376588871 | 5.075775307 | 2.28068E-06 | FBgn0260386 |
| GB47944 | -3.376621343 | 5.882451779 | 1.33729E-10 | FBgn0035410 |
| GB46975 | -3.380730127 | 6.1511523   | 1.68211E-06 | FBgn0002183 |
| GB54750 | -3.401846364 | 5.156963665 | 9.54848E-08 | FBgn0259226 |
| GB41616 | -3.423433276 | 5.358728891 | 1.8741E-08  | FBgn0031449 |



|         |              |             |             |             |
|---------|--------------|-------------|-------------|-------------|
| GB43892 | -3.441720327 | 7.97802173  | 1.74363E-11 | FBgn0032945 |
| GB55231 | -3.444761283 | 6.959167909 | 5.76545E-12 | FBgn0033602 |
| GB40681 | -3.452849119 | 4.417577522 | 0.00035031  | FBgn0051522 |
| GB43276 | -3.461052251 | 5.960775657 | 6.52267E-12 | FBgn0058470 |
| GB44452 | -3.469214775 | 6.971253865 | 1.5109E-11  | FBgn0032803 |
| GB40996 | -3.471097482 | 5.224161641 | 6.95305E-08 | FBgn0260793 |
| GB49223 | -3.472313093 | 8.083933718 | 7.83667E-12 | FBgn0259108 |
| GB51828 | -3.479089194 | 5.86285037  | 6.31114E-11 | FBgn0036377 |
| GB41945 | -3.486713237 | 7.337082766 | 6.8411E-11  | FBgn0031097 |
| GB48258 | -3.487935181 | 4.087511058 | 0.000140949 | FBgn0038151 |
| GB41723 | -3.508829278 | 8.438320911 | 3.83109E-12 | FBgn0261269 |
| GB42427 | -3.515309425 | 8.342531206 | 9.98691E-12 | FBgn0039640 |
| GB40165 | -3.524288341 | 10.61114485 | 6.73676E-11 | FBgn0003065 |
| GB50236 | -3.524514394 | 6.596171141 | 2.52686E-07 | FBgn0035788 |
| GB45019 | -3.549271145 | 5.833765206 | 1.79639E-08 | FBgn0038894 |
| GB55650 | -3.55026924  | 7.498486834 | 1.1553E-12  | FBgn0011286 |
| GB43465 | -3.554733566 | 6.560950536 | 1.06227E-12 | FBgn0039208 |
| GB42303 | -3.564357315 | 6.208746255 | 3.49874E-11 | FBgn0052816 |
| GB51560 | -3.585347755 | 9.581586872 | 2.24793E-12 | FBgn0034022 |
| GB50041 | -3.586787599 | 3.591192908 | 0.002159812 | FBgn0039749 |
| GB55729 | -3.594898287 | 6.801643981 | 2.99515E-12 | FBgn0041712 |
| GB51051 | -3.605699894 | 4.083894106 | 0.001435012 | FBgn0083978 |
| GB44200 | -3.611829434 | 3.646066184 | 0.001461311 | FBgn0030491 |
| GB51482 | -3.612227205 | 7.392198715 | 3.1723E-12  | FBgn0085446 |
| GB40234 | -3.614210599 | 5.158856937 | 2.92287E-08 | FBgn0037565 |
| GB43643 | -3.629612568 | 5.680497071 | 6.37075E-10 | FBgn0016694 |
| GB47976 | -3.633746327 | 6.314898271 | 8.58503E-14 | FBgn0035308 |
| GB41622 | -3.639176694 | 4.992834688 | 0.000487882 | FBgn0035429 |
| GB55403 | -3.67261937  | 6.92688279  | 6.96727E-13 | FBgn0259994 |
| GB41306 | -3.677720438 | 8.656734182 | 3.29372E-11 | FBgn0000046 |
| GB51089 | -3.682510723 | 4.658406155 | 1.84272E-06 | FBgn0035917 |
| GB54393 | -3.682632495 | 6.857884052 | 2.24793E-12 | FBgn0031646 |
| GB49275 | -3.687817518 | 6.030506029 | 1.59628E-11 | FBgn0038837 |
| GB47788 | -3.690337725 | 3.697438861 | 0.000820001 | FBgn0261588 |
| GB43691 | -3.696550957 | 6.569915354 | 3.16717E-11 | FBgn0038017 |
| GB40008 | -3.697204164 | 7.131445421 | 4.12557E-13 | FBgn0261836 |
| GB55445 | -3.706237289 | 4.682719729 | 1.42693E-06 | FBgn0021767 |
| GB47906 | -3.713820006 | 9.585188602 | 3.19889E-13 | FBgn0033731 |
| GB50171 | -3.718417147 | 7.2436332   | 5.86962E-13 | FBgn0262717 |
| GB41516 | -3.729579953 | 4.668018002 | 2.02586E-06 | FBgn0004865 |
| GB45938 | -3.738566975 | 5.01881578  | 3.10912E-08 | FBgn0000075 |
| GB51901 | -3.778849615 | 6.962300232 | 7.01313E-13 | FBgn0052645 |
| GB54302 | -3.780411667 | 5.610976399 | 9.42342E-09 | FBgn0038986 |
| GB51060 | -3.793913475 | 4.318265439 | 4.69368E-05 | FBgn0035625 |
| GB53579 | -3.811421911 | 5.531300666 | 2.65795E-09 | FBgn0051148 |
| GB46705 | -3.823282605 | 8.669435626 | 7.46009E-12 | FBgn0053519 |
| GB42769 | -3.85637941  | 10.4818936  | 7.64406E-14 | FBgn0038405 |
| GB47037 | -3.86421826  | 7.804414959 | 6.78622E-13 | FBgn0264562 |
| GB41310 | -3.879307412 | 9.603679115 | 6.02421E-14 | FBgn0000046 |
| GB55202 | -3.896139926 | 4.861703186 | 1.68094E-07 | FBgn0041711 |
| GB42851 | -3.903595877 | 4.292643963 | 0.001182561 | FBgn0085472 |
| GB48003 | -3.910967283 | 5.348645302 | 2.36146E-08 | FBgn0039214 |
| GB50570 | -3.927145337 | 6.486204948 | 1.62753E-10 | FBgn0037419 |
| GB48125 | -3.936235972 | 7.037391903 | 8.3825E-13  | FBgn0031869 |
| GB44222 | -3.955825696 | 7.246981119 | 3.97435E-12 | FBgn0039897 |
| GB45853 | -3.959210184 | 4.929079531 | 2.66783E-08 | FBgn0039075 |

|         |              |             |             |             |
|---------|--------------|-------------|-------------|-------------|
| GB47221 | -3.959906843 | 3.022790921 | 0.008352991 | FBgn0052212 |
| GB55617 | -3.959916752 | 5.876954362 | 5.917E-14   | FBgn0029836 |
| GB42594 | -3.96597476  | 6.280442858 | 1.33742E-14 | FBgn0036834 |
| GB46298 | -3.982096772 | 7.257393685 | 6.83032E-12 | FBgn0033728 |
| GB51818 | -3.990948484 | 4.939022905 | 6.17849E-08 | FBgn0030591 |
| GB42206 | -3.992052356 | 6.902002641 | 3.16339E-12 | FBgn0260856 |
| GB46819 | -4.001311994 | 6.502530089 | 1.969E-13   | FBgn0051296 |
| GB54884 | -4.005734896 | 9.039128608 | 5.6353E-15  | FBgn0053978 |
| GB49639 | -4.028903205 | 7.864100196 | 2.23242E-12 | FBgn0039648 |
| GB52723 | -4.030291432 | 6.619578357 | 1.68466E-13 | FBgn0262647 |
| GB53286 | -4.045021291 | 8.204435484 | 1.27841E-13 | FBgn0262111 |
| GB46365 | -4.057024912 | 4.974456709 | 5.70199E-07 | FBgn0011693 |
| GB42599 | -4.067659803 | 4.592873065 | 7.36671E-06 | FBgn0053196 |
| GB53197 | -4.104794396 | 3.206992681 | 0.00121451  | FBgn0039633 |
| GB43052 | -4.111074482 | 9.056160042 | 8.23506E-14 | FBgn0003149 |
| GB55604 | -4.127228218 | 4.660725096 | 2.86254E-07 | FBgn0010316 |
| GB43029 | -4.150704452 | 8.518273872 | 8.78612E-13 | FBgn0000047 |
| GB55158 | -4.152293777 | 6.749309648 | 9.55066E-14 | FBgn0027495 |
| GB53420 | -4.183383145 | 4.180465351 | 7.45652E-06 | FBgn0050044 |
| GB50973 | -4.185056482 | 7.327724912 | 5.917E-14   | FBgn0036044 |
| GB42967 | -4.188475931 | 3.267654717 | 0.00181652  | FBgn0036096 |
| GB47669 | -4.202419067 | 12.1009711  | 4.95355E-17 | FBgn0015766 |
| GB53935 | -4.228564203 | 3.343086793 | 0.000515938 | FBgn0011476 |
| GB41621 | -4.228605778 | 4.235715691 | 5.13241E-06 | FBgn0002440 |
| GB49405 | -4.228605778 | 4.079442027 | 0.000484898 | 0           |
| GB52992 | -4.23549102  | 8.019294916 | 5.76923E-10 | FBgn0052354 |
| GB50610 | -4.240363463 | 10.71306543 | 3.08031E-17 | FBgn0050101 |
| GB52666 | -4.242892344 | 5.156182554 | 9.19826E-10 | FBgn0053196 |
| GB42286 | -4.246850402 | 6.254045241 | 1.13207E-15 | FBgn0037122 |
| GB41178 | -4.256662856 | 4.260622205 | 4.03648E-06 | FBgn0038727 |
| GB40085 | -4.27637473  | 4.192402129 | 3.161E-05   | FBgn0029807 |
| GB55598 | -4.277513258 | 8.708018994 | 5.62437E-14 | FBgn0004028 |
| GB54455 | -4.290474886 | 3.293843861 | 0.002512822 | FBgn0052829 |
| GB50170 | -4.291997564 | 8.286038948 | 1.39962E-16 | FBgn0262717 |
| GB48443 | -4.301960365 | 7.483445411 | 1.34227E-15 | FBgn0029922 |
| GB55325 | -4.320665639 | 6.892554585 | 1.09111E-14 | FBgn0003721 |
| GB52824 | -4.327509458 | 5.992688385 | 7.71415E-13 | FBgn0033869 |
| GB46698 | -4.343799181 | 5.501416226 | 2.07835E-10 | FBgn0039862 |
| GB48167 | -4.34877614  | 7.965360417 | 2.97617E-15 | FBgn0262508 |
| GB45732 | -4.348780763 | 8.329065124 | 9.50218E-17 | FBgn0036486 |
| GB41311 | -4.35737666  | 8.724073903 | 4.02128E-16 | FBgn0000045 |
| GB40944 | -4.358924532 | 8.063150791 | 4.90243E-17 | FBgn0034903 |
| GB46038 | -4.361571307 | 5.197874416 | 1.40988E-08 | FBgn0052072 |
| GB50529 | -4.367414409 | 4.217287977 | 0.000121677 | FBgn0037421 |
| GB54970 | -4.380997987 | 8.273651195 | 2.95582E-15 | FBgn0035089 |
| GB43053 | -4.381968889 | 8.866576482 | 1.39634E-14 | FBgn0003149 |
| GB41946 | -4.43670816  | 8.680577925 | 2.07706E-17 | FBgn0022770 |
| GB41495 | -4.450448858 | 5.679412883 | 1.03428E-13 | FBgn0016693 |
| GB42469 | -4.460801723 | 5.32883527  | 1.30455E-10 | FBgn0036939 |
| GB42889 | -4.467249783 | 5.691400816 | 2.91771E-14 | FBgn0039478 |
| GB49646 | -4.469094607 | 7.288566811 | 1.33937E-16 | FBgn0038511 |
| GB42891 | -4.469905314 | 7.714773098 | 1.14918E-15 | FBgn0024366 |
| GB42673 | -4.470292705 | 7.758095292 | 7.96992E-17 | FBgn0032405 |
| GB43580 | -4.475025676 | 10.26650598 | 2.60627E-18 | FBgn0039126 |
| GB50062 | -4.505707397 | 5.694865164 | 2.08034E-13 | FBgn0037665 |
| GB50006 | -4.527455125 | 3.548210442 | 0.000692386 | FBgn0039927 |

|         |              |             |             |             |
|---------|--------------|-------------|-------------|-------------|
| GB45654 | -4.549987965 | 6.200704744 | 5.66322E-16 | FBgn0025837 |
| GB41792 | -4.583154146 | 9.43318071  | 1.01665E-17 | FBgn0040601 |
| GB40623 | -4.585361679 | 4.493376025 | 1.40963E-06 | FBgn0013733 |
| GB41771 | -4.5862443   | 6.194284264 | 2.54357E-15 | FBgn0024897 |
| GB50766 | -4.589644777 | 7.140310981 | 4.95599E-17 | FBgn0264357 |
| GB50450 | -4.601842795 | 10.14761913 | 2.8631E-13  | FBgn0001250 |
| GB42358 | -4.60382056  | 7.155705155 | 3.82888E-17 | FBgn0087011 |
| GB46310 | -4.607940378 | 7.643967304 | 6.07039E-18 | FBgn0000551 |
| GB48216 | -4.614427248 | 6.259634902 | 2.77797E-17 | FBgn0031692 |
| GB40007 | -4.619548741 | 6.591943511 | 5.25613E-18 | FBgn0261836 |
| GB52179 | -4.620784914 | 3.580099331 | 0.000393494 | FBgn0026314 |
| GB55396 | -4.627097253 | 7.722834951 | 5.82491E-17 | FBgn0052694 |
| GB41241 | -4.630434324 | 6.080065548 | 1.38526E-16 | FBgn0033633 |
| GB53288 | -4.659290927 | 4.494329268 | 7.94652E-06 | FBgn0040211 |
| GB51698 | -4.673926477 | 13.27167587 | 2.7876E-19  | FBgn0002564 |
| GB47223 | -4.691949181 | 4.65111896  | 4.23085E-08 | FBgn0000568 |
| GB53516 | -4.692738241 | 8.414489587 | 1.41516E-17 | FBgn0043792 |
| GB49400 | -4.711722856 | 6.515135488 | 2.48472E-17 | FBgn0262599 |
| GB55611 | -4.711751657 | 5.188350976 | 4.16404E-09 | FBgn0010399 |
| GB42852 | -4.729615713 | 4.685471151 | 4.70181E-08 | FBgn0085472 |
| GB54963 | -4.741010312 | 4.588816508 | 1.06104E-06 | FBgn0039335 |
| GB51407 | -4.752951863 | 6.633454006 | 2.7075E-13  | FBgn0050069 |
| GB54133 | -4.764054675 | 3.748066578 | 9.93925E-05 | FBgn0038958 |
| GB42704 | -4.78891552  | 7.865172691 | 3.78287E-17 | FBgn0037290 |
| GB50439 | -4.812631542 | 9.561017666 | 1.03485E-16 | FBgn0039480 |
| GB40607 | -4.822213342 | 5.264951247 | 5.01474E-08 | FBgn0037556 |
| GB51214 | -4.824596702 | 9.540007    | 1.60611E-16 | FBgn0004169 |
| GB40228 | -4.843687604 | 6.034784023 | 1.18387E-17 | 0           |
| GB50650 | -4.846043513 | 6.515542172 | 9.28512E-10 | FBgn0033359 |
| GB42901 | -4.852877411 | 6.302846388 | 1.6544E-06  | FBgn0030539 |
| GB50572 | -4.867533146 | 7.192236873 | 9.74409E-15 | FBgn0040279 |
| GB42596 | -4.879066174 | 7.765935055 | 1.44483E-12 | FBgn0021742 |
| GB54456 | -4.883901725 | 5.776622852 | 1.93286E-16 | FBgn0032462 |
| GB53986 | -4.894279481 | 5.381626728 | 1.18701E-11 | FBgn0026268 |
| GB48769 | -4.894279481 | 5.290398982 | 1.04048E-09 | FBgn0032362 |
| GB49979 | -4.904307411 | 3.922275751 | 1.22672E-05 | FBgn0043550 |
| GB42890 | -4.905604028 | 5.89594232  | 6.4459E-07  | FBgn0039027 |
| GB41904 | -4.907472425 | 6.81923209  | 1.05998E-17 | FBgn0030884 |
| GB46386 | -4.91301712  | 5.407530424 | 2.62001E-13 | FBgn0050420 |
| GB42580 | -4.913995417 | 6.314129938 | 3.36435E-18 | FBgn0261446 |
| GB48967 | -4.929588106 | 4.867347663 | 1.87104E-09 | FBgn0260006 |
| GB51787 | -4.93659812  | 9.41056331  | 2.99533E-19 | FBgn0002772 |
| GB49401 | -4.937038118 | 4.882325592 | 2.442E-09   | FBgn0030257 |
| GB50636 | -4.963164009 | 9.196844097 | 4.67465E-20 | FBgn0031097 |
| GB49270 | -4.967264033 | 3.974971812 | 8.19462E-06 | FBgn0032402 |
| GB49802 | -4.979491775 | 5.840499613 | 3.35978E-14 | FBgn0086906 |
| GB48979 | -5.000042478 | 4.957946378 | 2.28613E-10 | FBgn0037323 |
| GB48474 | -5.003769054 | 9.951906886 | 2.71662E-21 | FBgn0035398 |
| GB49795 | -5.022669546 | 7.469707682 | 2.79262E-12 | FBgn0029681 |
| GB52105 | -5.050533717 | 6.322343394 | 5.65212E-11 | FBgn0051807 |
| GB53119 | -5.059572344 | 10.27461094 | 3.74174E-12 | 0           |
| GB50574 | -5.063927966 | 5.347371478 | 2.26061E-06 | FBgn0051561 |
| GB40240 | -5.07906629  | 10.60085808 | 8.67376E-19 | FBgn0002773 |
| GB53517 | -5.0903041   | 6.453748069 | 2.21579E-16 | FBgn0035935 |
| GB42909 | -5.123520862 | 6.133214261 | 3.05489E-10 | FBgn0039027 |
| GB54767 | -5.128500968 | 4.106690252 | 2.36331E-06 | FBgn0030947 |

|         |              |             |             |             |
|---------|--------------|-------------|-------------|-------------|
| GB40837 | -5.131977626 | 9.946964316 | 9.27766E-21 | FBgn0037323 |
| GB50612 | -5.150752422 | 4.862733946 | 5.50144E-05 | FBgn0050101 |
| GB53524 | -5.157743436 | 7.638743803 | 1.21816E-18 | FBgn0043792 |
| GB43298 | -5.195641863 | 9.388802988 | 1.26578E-18 | FBgn0030539 |
| GB50505 | -5.20020672  | 6.984923936 | 1.0472E-07  | FBgn0032536 |
| GB53112 | -5.201284026 | 6.032861077 | 3.17327E-15 | FBgn0034289 |
| GB52184 | -5.20133813  | 6.566573206 | 5.42856E-20 | 0           |
| GB40771 | -5.209001121 | 6.584630874 | 8.68534E-21 | FBgn0033763 |
| GB40299 | -5.225665665 | 5.095214389 | 2.35123E-08 | FBgn0035513 |
| GB50828 | -5.227328837 | 7.733309261 | 1.13311E-20 | FBgn0261836 |
| GB45850 | -5.232215992 | 9.397465583 | 4.2515E-16  | FBgn0035636 |
| GB41015 | -5.261376716 | 11.86560702 | 9.15957E-24 | FBgn0031957 |
| GB49772 | -5.261518662 | 6.735665951 | 1.23187E-12 | FBgn0029681 |
| GB42908 | -5.308979012 | 6.525762316 | 3.20014E-08 | FBgn0039027 |
| GB48066 | -5.312705556 | 6.147827156 | 8.45065E-19 | FBgn0020389 |
| GB40604 | -5.316092425 | 6.538449632 | 6.83322E-09 | FBgn0261526 |
| GB46385 | -5.322495424 | 4.329238054 | 1.35352E-07 | FBgn0003292 |
| GB41383 | -5.334975854 | 5.189007021 | 3.80274E-08 | FBgn0035788 |
| GB48161 | -5.364973733 | 9.671282629 | 8.48684E-23 | FBgn0034391 |
| GB51653 | -5.376571988 | 11.50213939 | 1.21098E-20 | FBgn0264695 |
| GB47947 | -5.425736042 | 8.108635449 | 1.25406E-21 | FBgn0013988 |
| GB49268 | -5.431318343 | 5.342953824 | 1.69128E-13 | FBgn0038837 |
| GB48860 | -5.468234985 | 6.272513028 | 2.10193E-16 | FBgn0038819 |
| GB50827 | -5.515666778 | 8.34261141  | 4.27784E-21 | FBgn0051205 |
| GB54489 | -5.533143841 | 5.460062199 | 2.09285E-15 | FBgn0052829 |
| GB51652 | -5.54118547  | 8.856351513 | 1.42371E-19 | FBgn0264695 |
| GB42702 | -5.553517274 | 9.856758185 | 1.9642E-24  | FBgn0037288 |
| GB42763 | -5.626882386 | 7.991567755 | 1.36579E-21 | FBgn0023388 |
| GB45764 | -5.628085043 | 8.11348145  | 1.53118E-22 | FBgn0004117 |
| GB44561 | -5.638680894 | 6.7162285   | 7.37718E-19 | FBgn0039075 |
| GB51441 | -5.659804983 | 11.71782084 | 3.704E-26   | FBgn0019960 |
| GB43181 | -5.669761698 | 8.073281109 | 8.92631E-12 | FBgn0037992 |
| GB48107 | -5.67121616  | 7.509795368 | 3.78135E-20 | FBgn0017561 |
| GB47752 | -5.67807148  | 7.154193147 | 1.53204E-17 | FBgn0001992 |
| GB42911 | -5.686775429 | 5.921264102 | 1.70245E-07 | FBgn0053299 |
| GB49689 | -5.69838433  | 8.174291769 | 1.19704E-22 | FBgn0004577 |
| GB55100 | -5.698601303 | 6.771440493 | 7.62528E-17 | FBgn0003016 |
| GB47118 | -5.72962484  | 8.948216195 | 1.77079E-23 | FBgn0038439 |
| GB50562 | -5.731825364 | 8.213861947 | 1.68094E-07 | FBgn0037411 |
| GB46973 | -5.750173258 | 8.304950112 | 9.13244E-23 | FBgn0263038 |
| GB42912 | -5.78890332  | 7.942726717 | 1.19258E-17 | FBgn0053196 |
| GB48861 | -5.811916254 | 7.514993833 | 1.62522E-20 | FBgn0038819 |
| GB55614 | -5.832397539 | 7.499334266 | 1.22106E-20 | FBgn0011225 |
| GB52634 | -5.837307846 | 4.809996582 | 1.0221E-10  | FBgn0040087 |
| GB53120 | -5.860395155 | 7.170134786 | 5.55599E-20 | FBgn0013733 |
| GB40447 | -5.882934827 | 8.651582743 | 8.6541E-17  | FBgn0033869 |
| GB50563 | -5.883237002 | 4.614939424 | 7.95893E-05 | FBgn0037413 |
| GB49021 | -5.883730462 | 10.62075115 | 9.8961E-25  | FBgn0034030 |
| GB45860 | -5.891897718 | 7.199745564 | 5.05317E-16 | FBgn0066365 |
| GB47126 | -5.895739824 | 4.867065402 | 5.19466E-11 | FBgn0004577 |
| GB54791 | -5.900710771 | 4.872948606 | 2.70353E-11 | FBgn0003089 |
| GB42582 | -5.901817777 | 7.20257652  | 6.60602E-20 | FBgn0035280 |
| GB48174 | -5.927315155 | 9.705478366 | 5.22463E-22 | FBgn0033158 |
| GB53110 | -5.942960909 | 14.12357249 | 6.8628E-27  | FBgn0034289 |
| GB47550 | -5.948815592 | 5.761671763 | 1.16654E-15 | FBgn0052537 |
| GB50613 | -5.958593634 | 11.53710397 | 1.58924E-21 | FBgn0050101 |

|         |              |             |             |             |
|---------|--------------|-------------|-------------|-------------|
| GB46518 | -5.985827536 | 8.953630884 | 9.88118E-12 | 0           |
| GB52052 | -6.017306843 | 8.498174344 | 2.51944E-20 | FBgn0029690 |
| GB48173 | -6.099895663 | 8.453035554 | 5.58318E-25 | FBgn0033158 |
| GB42597 | -6.13397977  | 13.03752651 | 1.86784E-29 | FBgn0032538 |
| GB40624 | -6.136362757 | 8.944943441 | 2.54615E-26 | FBgn0259247 |
| GB50875 | -6.147274236 | 7.949667458 | 1.22351E-20 | FBgn0053126 |
| GB46585 | -6.151727588 | 12.7367896  | 2.23647E-27 | FBgn0032538 |
| GB46591 | -6.203496162 | 12.43374947 | 1.12512E-28 | FBgn0032538 |
| GB50442 | -6.20580769  | 6.075424801 | 1.08959E-21 | FBgn0039480 |
| GB50449 | -6.250275011 | 7.888936183 | 9.5565E-22  | 0           |
| GB40659 | -6.278391126 | 5.224259603 | 7.64406E-14 | FBgn0043043 |
| GB50451 | -6.315005955 | 11.71534458 | 1.22376E-25 | FBgn0053196 |
| GB55612 | -6.334357845 | 8.446978476 | 1.22376E-25 | FBgn0263216 |
| GB43769 | -6.345322502 | 7.508605589 | 6.11743E-08 | FBgn0037411 |
| GB49394 | -6.370538984 | 8.710313977 | 1.29816E-26 | FBgn0259247 |
| GB44399 | -6.372248625 | 11.70118153 | 9.51302E-25 | FBgn0050101 |
| GB42888 | -6.375866164 | 10.44978855 | 1.64607E-29 | FBgn0053196 |
| GB41624 | -6.390529412 | 7.094602688 | 9.56119E-22 | FBgn0035845 |
| GB45957 | -6.469093576 | 8.59068493  | 3.34109E-25 | FBgn0034157 |
| GB53525 | -6.666614307 | 6.947096958 | 3.62627E-21 | FBgn0035641 |
| GB55599 | -6.673623889 | 6.99200816  | 9.5983E-22  | FBgn0052656 |
| GB45763 | -6.68566318  | 7.703670621 | 7.3201E-22  | FBgn0004117 |
| GB53113 | -6.75553388  | 8.998949457 | 3.34109E-25 | FBgn0040496 |
| GB46414 | -6.775798514 | 5.490457143 | 1.47678E-08 | 0           |
| GB47903 | -6.828087231 | 8.086577502 | 3.31662E-26 | FBgn0036110 |
| GB52104 | -6.832826765 | 5.675314861 | 3.02205E-16 | FBgn0039479 |
| GB47946 | -6.87511309  | 5.794020067 | 1.01541E-19 | FBgn0013988 |
| GB48794 | -6.906083237 | 11.61150205 | 3.58626E-32 | FBgn0004034 |
| GB46394 | -6.95173624  | 7.641176016 | 1.09364E-25 | FBgn0035091 |
| GB42910 | -7.046498393 | 6.667044408 | 6.62905E-10 | FBgn0053299 |
| GB43877 | -7.076041295 | 6.765485901 | 1.19762E-18 | FBgn0034883 |
| GB46399 | -7.257683071 | 8.913178316 | 3.89876E-26 | FBgn0032256 |
| GB50876 | -7.357848942 | 6.078127027 | 1.19691E-13 | FBgn0053126 |
| GB49981 | -7.840435983 | 2.497368882 | 0.003059751 | FBgn0030056 |
| GB43805 | -7.840435983 | 2.505384318 | 0.005729616 | FBgn0029843 |
| GB42923 | -7.854314648 | 2.508635403 | 0.003217833 | FBgn0015562 |
| GB47536 | -8.035778123 | 2.688680349 | 0.002286752 | FBgn0038181 |
| GB46403 | -8.071862003 | 2.734406378 | 0.001185691 | FBgn0036299 |
| GB48044 | -8.118611466 | 2.755880972 | 0.001584801 | FBgn0005666 |
| GB47129 | -8.207797358 | 2.824937088 | 0.002196346 | FBgn0041711 |
| GB53313 | -8.271245351 | 2.830567209 | 0.002104741 | 0           |
| GB42635 | -8.28155394  | 2.823128043 | 0.002920167 | FBgn0085458 |
| GB52635 | -8.341904934 | 2.962246102 | 0.000404198 | FBgn0034071 |
| GB48796 | -8.399832361 | 3.037085578 | 0.000176534 | FBgn0012344 |
| GB48489 | -8.399832361 | 3.013259907 | 0.000482801 | FBgn0031835 |
| GB50611 | -8.666880929 | 3.100639235 | 0.000996708 | FBgn0050101 |
| GB49962 | -8.674723755 | 3.169430899 | 0.000464735 | FBgn0004511 |
| GB49295 | -8.938473177 | 3.529689897 | 1.01333E-05 | FBgn0014859 |
| GB53689 | -8.944973238 | 3.510224825 | 1.36985E-05 | FBgn0032707 |
| GB42641 | -8.957886157 | 3.426289291 | 0.000105351 | FBgn0039200 |
| GB44199 | -9.150168536 | 3.732171326 | 2.83119E-06 | FBgn0052635 |
| GB54457 | -9.161376107 | 3.739067584 | 1.59643E-06 | FBgn0052829 |
| GB43367 | -9.242767548 | 3.633996971 | 0.00020064  | FBgn0053003 |
| GB47120 | -9.319811375 | 3.880090172 | 4.24908E-07 | FBgn0038880 |
| GB54904 | -9.407141415 | 3.978870415 | 9.61901E-08 | FBgn0032402 |
| GB53285 | -9.511548787 | 4.003998832 | 6.37447E-07 | FBgn0002709 |

|         |              |             |             |             |
|---------|--------------|-------------|-------------|-------------|
| GB52017 | -9.637279865 | 4.187954151 | 3.77301E-08 | FBgn0037552 |
| GB51819 | -9.66510502  | 4.211463133 | 9.08161E-09 | FBgn0030590 |
| GB42581 | -10.16569194 | 4.693007026 | 1.05534E-11 | FBgn0035873 |
| GB50887 | -10.31617728 | 4.830383946 | 3.18149E-12 | FBgn0029961 |
| GB46417 | -10.32617086 | 4.640635227 | 8.05254E-07 | FBgn0037662 |
| GB50577 | -10.35818001 | 4.703918873 | 2.48321E-08 | FBgn0037427 |
| GB47927 | -10.54091321 | 4.936161678 | 5.95629E-11 | 0           |

| <b>Contrast 5</b>                      |              |               |             |                         |
|----------------------------------------|--------------|---------------|-------------|-------------------------|
| <b>High SBV+DWV vs. high DWV alone</b> |              |               |             |                         |
| <b>Gene Label</b>                      | <b>logFC</b> | <b>logCPM</b> | <b>FDR</b>  | <b>Flybase ortholog</b> |
| GB50423                                | 11.1294679   | 10.02259936   | 2.63866E-20 | FBgn0052055             |
| GB47618                                | 10.73008124  | 6.846675562   | 6.29063E-12 | FBgn0010385             |
| GB51306                                | 10.66243523  | 6.788443299   | 9.97726E-14 | 0                       |
| GB47318                                | 10.45491324  | 9.337038613   | 6.40191E-14 | FBgn0032835             |
| GB41637                                | 9.44816399   | 7.518765168   | 4.4782E-16  | FBgn0030905             |
| GB48823                                | 9.059994519  | 8.849007475   | 5.87727E-17 | FBgn0004778             |
| GB47520                                | 8.80285493   | 4.855140229   | 2.86879E-05 | FBgn0045827             |
| GB41428                                | 8.737737519  | 9.050191849   | 6.40191E-14 | FBgn0010385             |
| GB43112                                | 8.612284858  | 9.639760112   | 4.76932E-19 | FBgn0028573             |
| GB49890                                | 8.399584379  | 7.817103953   | 1.58854E-10 | FBgn0033302             |
| GB41097                                | 8.28640088   | 4.310261249   | 0.000633874 | FBgn0051954             |
| GB45912                                | 8.285742369  | 11.01649526   | 2.6302E-20  | FBgn0011296             |
| GB48833                                | 8.209042737  | 8.304320765   | 9.85224E-12 | FBgn0004778             |
| GB54238                                | 8.133610133  | 6.972836359   | 4.48161E-13 | FBgn0053547             |
| GB53798                                | 8.123963084  | 9.712437427   | 3.71765E-12 | FBgn0032132             |
| GB50121                                | 8.067856435  | 9.468565805   | 2.36924E-19 | FBgn0029167             |
| GB42310                                | 7.997920747  | 4.016861727   | 0.002901491 | FBgn0045827             |
| GB45954                                | 7.906737128  | 6.792605007   | 4.1665E-09  | FBgn0053196             |
| GB47475                                | 7.811441399  | 10.81471708   | 7.02186E-20 | FBgn0011296             |
| GB55435                                | 7.735402372  | 5.736645493   | 5.19261E-09 | FBgn0020626             |
| GB54139                                | 7.70989919   | 5.692771841   | 5.33886E-09 | FBgn0000299             |
| GB50363                                | 7.68733836   | 3.708040187   | 0.017391675 | FBgn0038642             |
| GB42626                                | 7.667318782  | 8.690130254   | 6.18207E-17 | FBgn0005613             |
| GB48148                                | 7.62539667   | 7.678255802   | 2.12554E-17 | FBgn0034140             |
| GB48134                                | 7.557757705  | 10.31468734   | 2.95337E-11 | FBgn0001258             |
| GB48146                                | 7.453857028  | 6.813468517   | 9.62766E-09 | FBgn0038071             |
| GB51223                                | 7.410290925  | 11.43488687   | 9.33872E-17 | FBgn0014002             |
| GB51174                                | 7.161873481  | 9.974727698   | 9.33872E-17 | FBgn0033661             |
| GB50477                                | 7.037438926  | 9.121530994   | 5.25023E-14 | FBgn0263774             |
| GB45910                                | 7.033663626  | 12.22179445   | 1.00758E-17 | FBgn0011296             |
| GB55203                                | 6.947876435  | 6.655438377   | 2.28278E-13 | FBgn0034856             |
| GB55515                                | 6.932888132  | 8.725130529   | 1.2836E-10  | FBgn0036262             |
| GB42554                                | 6.834766269  | 5.600380669   | 2.20095E-09 | FBgn0036191             |
| GB42540                                | 6.83190309   | 7.978471707   | 7.69901E-17 | FBgn0037329             |
| GB42797                                | 6.788055969  | 8.37528956    | 8.75404E-16 | FBgn0037288             |
| GB49219                                | 6.737188256  | 4.712163821   | 0.00015029  | FBgn0031905             |
| GB44871                                | 6.650904194  | 7.335061496   | 8.46375E-17 | FBgn0038074             |
| GB45909                                | 6.627495586  | 11.38868179   | 1.00129E-16 | FBgn0011296             |
| GB40227                                | 6.577143471  | 4.531621804   | 0.000164117 | FBgn0036316             |
| GB41722                                | 6.447827503  | 10.19077215   | 1.06473E-11 | FBgn0033246             |
| GB45708                                | 6.397102907  | 4.365162204   | 0.000553601 | FBgn0031975             |
| GB53860                                | 6.305850813  | 9.367883266   | 2.09477E-13 | FBgn0026575             |
| GB41709                                | 6.260343936  | 8.522190073   | 3.65266E-13 | FBgn0030691             |
| GB54881                                | 6.226075161  | 6.254751387   | 3.07551E-10 | FBgn0036829             |

|         |             |             |             |             |
|---------|-------------|-------------|-------------|-------------|
| GB45713 | 6.191347009 | 4.150863096 | 0.001671168 | FBgn0031975 |
| GB41636 | 6.101601962 | 6.329582157 | 3.46494E-14 | FBgn0013733 |
| GB43924 | 6.076098185 | 10.20877693 | 1.07679E-13 | FBgn0263072 |
| GB45906 | 6.068702278 | 11.12313033 | 1.87517E-14 | FBgn0011296 |
| GB43007 | 5.994173766 | 3.98774223  | 0.008845594 | FBgn0030592 |
| GB47805 | 5.989048573 | 5.666078553 | 2.7424E-09  | FBgn0043575 |
| GB42621 | 5.907641241 | 10.03641208 | 1.31023E-12 | FBgn0016075 |
| GB47505 | 5.715345478 | 3.623138046 | 0.006272339 | FBgn0053870 |
| GB51419 | 5.698987784 | 6.703772561 | 9.14619E-11 | FBgn0035439 |
| GB46223 | 5.694128476 | 4.473993142 | 0.000893744 | FBgn0034470 |
| GB45907 | 5.654590275 | 9.747264003 | 4.24378E-13 | FBgn0011296 |
| GB47127 | 5.632912132 | 4.400055677 | 0.000371029 | FBgn0261832 |
| GB52100 | 5.596284069 | 11.7717312  | 2.38575E-11 | FBgn0000299 |
| GB44633 | 5.552716247 | 3.484463769 | 0.019754841 | 0           |
| GB49886 | 5.521563303 | 7.105955777 | 2.89026E-11 | FBgn0033302 |
| GB41222 | 5.395545605 | 4.144735037 | 0.0012432   | FBgn0035132 |
| GB51583 | 5.380060614 | 4.667098109 | 8.0076E-05  | FBgn0036117 |
| GB47270 | 5.358208027 | 4.131931043 | 0.00237264  | FBgn0015032 |
| GB44168 | 5.298498848 | 5.26404005  | 3.9326E-07  | FBgn0000490 |
| GB44996 | 5.25335743  | 10.44355556 | 4.96308E-09 | FBgn0002564 |
| GB40137 | 5.247545268 | 6.229461256 | 1.21462E-09 | FBgn0038595 |
| GB40288 | 5.244496579 | 4.97437399  | 0.000192078 | FBgn0033302 |
| GB42099 | 5.198372362 | 3.944261599 | 0.002823827 | FBgn0027600 |
| GB41708 | 5.191619434 | 9.119020515 | 1.24153E-10 | FBgn0036597 |
| GB44146 | 5.176476577 | 4.835076433 | 1.36054E-05 | FBgn0034709 |
| GB41284 | 5.175909775 | 7.145372657 | 5.73346E-12 | FBgn0050197 |
| GB42146 | 5.170313335 | 8.222071295 | 3.76735E-08 | FBgn0085446 |
| GB45714 | 5.159347267 | 3.054772915 | 0.046190762 | FBgn0031975 |
| GB42900 | 5.102074913 | 11.14627648 | 4.30045E-10 | FBgn0261564 |
| GB55451 | 5.096673349 | 10.17475596 | 1.59205E-11 | FBgn0002526 |
| GB40148 | 5.085940409 | 5.33318858  | 4.39313E-05 | FBgn0032810 |
| GB46587 | 4.927616862 | 9.127435911 | 7.28891E-10 | FBgn0053998 |
| GB47546 | 4.924760654 | 5.168641208 | 2.16899E-05 | 0           |
| GB52348 | 4.895413392 | 4.540899352 | 7.95272E-05 | FBgn0003162 |
| GB55452 | 4.840728458 | 9.620107041 | 5.87037E-07 | FBgn0052626 |
| GB52598 | 4.820914594 | 9.84912665  | 3.98306E-11 | FBgn0032213 |
| GB43027 | 4.809952672 | 4.114970606 | 0.003512583 | 0           |
| GB43208 | 4.746808998 | 9.215952778 | 8.92134E-11 | FBgn0036985 |
| GB41642 | 4.734071927 | 6.245593612 | 6.22006E-12 | 0           |
| GB46640 | 4.731996688 | 4.688932696 | 3.86225E-05 | FBgn0033628 |
| GB42985 | 4.724179768 | 6.736660965 | 7.98055E-07 | 0           |
| GB40708 | 4.64261627  | 9.161252959 | 3.59607E-10 | FBgn0029507 |
| GB52428 | 4.602525934 | 6.681691605 | 2.67718E-13 | FBgn0037126 |
| GB56028 | 4.575404306 | 7.44731739  | 1.44905E-10 | FBgn0036665 |
| GB55029 | 4.559006628 | 5.875961442 | 1.22246E-08 | FBgn0031176 |
| GB52919 | 4.547502276 | 7.993066475 | 3.37378E-09 | FBgn0036617 |
| GB43713 | 4.523567926 | 6.971255284 | 1.84874E-12 | FBgn0038037 |
| GB41706 | 4.49406445  | 5.289609618 | 5.46184E-06 | FBgn0028533 |
| GB42410 | 4.489310066 | 5.936982565 | 3.09258E-06 | FBgn0034638 |
| GB49442 | 4.459994459 | 3.739620352 | 0.012769134 | FBgn0036237 |
| GB42514 | 4.448993319 | 4.404175332 | 0.000235805 | FBgn0037297 |
| GB45911 | 4.421919414 | 6.192672842 | 4.57142E-11 | FBgn0011296 |
| GB49552 | 4.373032294 | 6.290686246 | 2.23257E-06 | FBgn0035501 |
| GB49441 | 4.365457036 | 8.385729962 | 5.04421E-09 | FBgn0003450 |
| GB48391 | 4.312443687 | 4.022446817 | 0.027093223 | FBgn0038135 |
| GB45913 | 4.309407012 | 12.26934563 | 1.72669E-09 | FBgn0011296 |

|         |             |             |             |             |
|---------|-------------|-------------|-------------|-------------|
| GB44995 | 4.303260569 | 3.53617174  | 0.008079992 | FBgn0051008 |
| GB50880 | 4.293018318 | 4.516122209 | 0.000830375 | FBgn0263968 |
| GB46142 | 4.265784314 | 5.354535029 | 2.78182E-05 | FBgn0026144 |
| GB50609 | 4.251525129 | 11.80309353 | 1.72316E-08 | FBgn0001219 |
| GB50608 | 4.225453994 | 5.446458397 | 8.30743E-05 | FBgn0033495 |
| GB51218 | 4.223871587 | 5.735557378 | 1.85412E-08 | 0           |
| GB54404 | 4.21162192  | 6.643048523 | 6.22006E-12 | FBgn0051522 |
| GB49440 | 4.209572911 | 6.688522666 | 4.45182E-12 | FBgn0039630 |
| GB49993 | 4.204165676 | 7.865052197 | 1.16919E-06 | FBgn0035787 |
| GB54219 | 4.198682952 | 10.11322659 | 3.53316E-08 | FBgn0086708 |
| GB52360 | 4.19666122  | 8.221367837 | 7.6453E-09  | FBgn0034886 |
| GB43739 | 4.174289215 | 4.137341659 | 0.005584259 | FBgn0035779 |
| GB50481 | 4.170530471 | 4.394178539 | 0.002522679 | FBgn0023479 |
| GB48820 | 4.151192817 | 10.9726422  | 1.29137E-08 | FBgn0028985 |
| GB54942 | 4.131732126 | 5.638044876 | 2.25238E-07 | FBgn0051720 |
| GB54289 | 4.127165786 | 6.66143285  | 1.438E-10   | FBgn0085407 |
| GB42244 | 4.123132921 | 8.600724768 | 4.03629E-09 | FBgn0043903 |
| GB45797 | 4.064664188 | 4.713818586 | 0.004469395 | FBgn0039896 |
| GB43716 | 4.004444538 | 6.013121291 | 8.5283E-09  | FBgn0038037 |
| GB49888 | 3.999365708 | 5.614989179 | 8.21336E-07 | FBgn0000473 |
| GB48903 | 3.980661144 | 5.287766586 | 3.6393E-06  | FBgn0038139 |
| GB53028 | 3.961433763 | 7.003973228 | 2.28983E-10 | FBgn0032116 |
| GB55204 | 3.958645823 | 5.506600717 | 0.00018384  | FBgn0039896 |
| GB50005 | 3.954222781 | 8.905968428 | 1.23642E-06 | FBgn0063923 |
| GB44503 | 3.89846719  | 4.521011337 | 0.000893744 | FBgn0085201 |
| GB49887 | 3.889107374 | 4.107168596 | 0.005214709 | FBgn0033304 |
| GB55205 | 3.880705361 | 6.694777373 | 7.01809E-09 | FBgn0039896 |
| GB52721 | 3.850395987 | 5.939238921 | 9.50989E-07 | FBgn0002576 |
| GB42217 | 3.849731549 | 4.051454581 | 0.004624744 | FBgn0039755 |
| GB51682 | 3.820926531 | 4.639529771 | 0.005937205 | FBgn0029958 |
| GB45955 | 3.810252639 | 9.910155643 | 1.12039E-07 | FBgn0260746 |
| GB48687 | 3.797587123 | 6.975583519 | 3.81927E-10 | FBgn0243514 |
| GB42135 | 3.768453279 | 5.185599528 | 3.71858E-05 | FBgn0038201 |
| GB49774 | 3.766635404 | 5.477297409 | 2.44078E-05 | 0           |
| GB41418 | 3.751062352 | 5.463727319 | 2.53862E-05 | FBgn0002526 |
| GB50526 | 3.739130295 | 6.494129775 | 3.53949E-10 | FBgn0038652 |
| GB47248 | 3.727980819 | 6.153398154 | 5.37827E-09 | FBgn0031146 |
| GB54732 | 3.719844416 | 5.801399364 | 1.30113E-06 | FBgn0030309 |
| GB54941 | 3.717682464 | 6.637841386 | 8.97431E-10 | FBgn0051720 |
| GB40021 | 3.717257232 | 11.55896028 | 2.10028E-07 | FBgn0036124 |
| GB50883 | 3.67640867  | 6.364616072 | 4.99515E-07 | FBgn0032638 |
| GB49885 | 3.658369869 | 7.587589683 | 1.96453E-05 | FBgn0033304 |
| GB40967 | 3.647267501 | 6.061740656 | 3.14672E-06 | FBgn0005626 |
| GB50124 | 3.63900998  | 4.086339558 | 0.010339884 | 0           |
| GB50137 | 3.624718287 | 5.490636873 | 1.22643E-05 | FBgn0004378 |
| GB43728 | 3.62381054  | 6.578149623 | 4.43512E-10 | FBgn0038037 |
| GB54231 | 3.606619038 | 4.248631565 | 0.014908015 | FBgn0024352 |
| GB49672 | 3.574643847 | 5.090872448 | 6.31963E-05 | FBgn0038842 |
| GB50906 | 3.557670475 | 6.354951169 | 7.10285E-07 | FBgn0032421 |
| GB41283 | 3.555979529 | 7.190061137 | 1.72123E-08 | FBgn0003137 |
| GB41202 | 3.54957026  | 6.080476368 | 6.10069E-08 | FBgn0027600 |
| GB46774 | 3.512426519 | 9.947412057 | 5.49594E-06 | FBgn0031322 |
| GB50761 | 3.474079449 | 4.691921194 | 0.003620539 | FBgn0038485 |
| GB47142 | 3.47332525  | 9.421042516 | 1.3691E-06  | FBgn0030608 |
| GB42053 | 3.457045108 | 5.411289174 | 0.000109527 | FBgn0031381 |
| GB54946 | 3.414699675 | 4.021887998 | 0.013709805 | FBgn0040299 |



|         |             |             |             |             |
|---------|-------------|-------------|-------------|-------------|
| GB49154 | 3.410928532 | 5.635031349 | 1.5954E-05  | FBgn0040491 |
| GB48194 | 3.395088505 | 5.181952362 | 6.49957E-05 | FBgn0039755 |
| GB47580 | 3.394397729 | 6.023600882 | 2.89943E-07 | FBgn0032817 |
| GB47279 | 3.39183888  | 4.60230988  | 0.002581786 | FBgn0033696 |
| GB42433 | 3.337394243 | 5.203380583 | 7.80187E-05 | FBgn0261797 |
| GB52920 | 3.315744317 | 5.031226852 | 0.000545961 | FBgn0036618 |
| GB44634 | 3.305685002 | 5.936706167 | 7.98055E-07 | FBgn0243512 |
| GB45701 | 3.305206487 | 6.636634366 | 2.9042E-08  | FBgn0027930 |
| GB46286 | 3.304625289 | 4.519408679 | 0.005380208 | FBgn0032144 |
| GB50156 | 3.304483443 | 5.879180574 | 3.33889E-07 | FBgn0039225 |
| GB55764 | 3.301209626 | 4.399096323 | 0.010860903 | FBgn0028675 |
| GB55068 | 3.274341784 | 4.48878369  | 0.006254304 | FBgn0085351 |
| GB40136 | 3.260728279 | 4.221831579 | 0.012889064 | FBgn0038595 |
| GB45796 | 3.260728279 | 4.222521886 | 0.013486858 | FBgn0004034 |
| GB47940 | 3.213377272 | 9.529851625 | 5.68352E-06 | FBgn0034096 |
| GB55889 | 3.206775689 | 6.67049121  | 1.50089E-08 | FBgn0035049 |
| GB55212 | 3.184581598 | 5.314651796 | 0.004982172 | FBgn0039896 |
| GB45157 | 3.181250122 | 5.76766538  | 6.04768E-06 | FBgn0013753 |
| GB50290 | 3.171603769 | 7.066121407 | 1.38796E-07 | FBgn0033033 |
| GB53865 | 3.152581729 | 6.900088242 | 9.48524E-08 | FBgn0013984 |
| GB51345 | 3.14829286  | 8.774969826 | 1.17262E-05 | FBgn0039151 |
| GB53077 | 3.140942869 | 5.525809779 | 4.16025E-05 | FBgn0039055 |
| GB46013 | 3.13374675  | 7.11524215  | 1.82451E-07 | FBgn0032010 |
| GB54541 | 3.129977843 | 7.2249687   | 3.32388E-06 | FBgn0031973 |
| GB42829 | 3.092119576 | 9.017384796 | 1.61837E-05 | FBgn0034405 |
| GB48905 | 3.050156158 | 8.383869331 | 9.80306E-05 | FBgn0010226 |
| GB53549 | 3.034451015 | 5.372412182 | 0.000244146 | FBgn0031037 |
| GB46438 | 3.031800402 | 6.320625766 | 1.56074E-06 | FBgn0027594 |
| GB48969 | 3.020799911 | 5.012171231 | 0.01257857  | FBgn0025592 |
| GB48505 | 3.019333081 | 10.48827024 | 4.69493E-05 | FBgn0026415 |
| GB45248 | 3.014350744 | 7.979796248 | 1.76504E-05 | FBgn0032180 |
| GB52631 | 3.011900841 | 6.325690826 | 8.18971E-06 | FBgn0003495 |
| GB50508 | 3.006930726 | 6.84484898  | 5.57022E-07 | FBgn0243514 |
| GB51613 | 3.00349064  | 5.597791055 | 4.85555E-05 | FBgn0263219 |
| GB43362 | 2.999464487 | 6.5503424   | 6.87715E-07 | FBgn0030421 |
| GB53318 | 2.98482137  | 5.273202101 | 0.000358895 | FBgn0001291 |
| GB54097 | 2.975779751 | 8.599422118 | 5.39239E-05 | FBgn0011672 |
| GB52829 | 2.971310149 | 11.43432723 | 6.91716E-05 | FBgn0026415 |
| GB45696 | 2.970210713 | 7.344337974 | 1.76467E-05 | FBgn0000567 |
| GB53550 | 2.941681022 | 6.778667806 | 1.19144E-06 | FBgn0031037 |
| GB54233 | 2.928900705 | 5.436803803 | 0.000374555 | FBgn0030964 |
| GB47055 | 2.928522341 | 6.077508473 | 7.63118E-06 | FBgn0031307 |
| GB53978 | 2.928493018 | 6.16302977  | 0.000112841 | FBgn0023479 |
| GB47939 | 2.914688826 | 5.649213885 | 5.76266E-05 | FBgn0040296 |
| GB49327 | 2.894121953 | 5.952862962 | 1.5418E-05  | FBgn0039131 |
| GB47749 | 2.876287006 | 7.14375698  | 3.68958E-06 | FBgn0039419 |
| GB51650 | 2.873271261 | 5.214769574 | 0.000486029 | FBgn0034392 |
| GB53143 | 2.844166283 | 7.013944238 | 1.59843E-06 | FBgn0016122 |
| GB44213 | 2.836226639 | 7.81552594  | 3.9083E-05  | FBgn0014141 |
| GB49775 | 2.820079322 | 9.365406311 | 0.000159962 | FBgn0011296 |
| GB48841 | 2.800165742 | 4.996215553 | 0.003536907 | FBgn0038819 |
| GB40141 | 2.789285777 | 8.701243658 | 0.000229391 | FBgn0038738 |
| GB54949 | 2.788988982 | 5.865121042 | 8.28606E-06 | FBgn0028978 |
| GB53221 | 2.777496141 | 4.956290566 | 0.003967032 | 0           |
| GB47929 | 2.741696942 | 5.133804064 | 0.000479945 | FBgn0025686 |
| GB52810 | 2.731104778 | 6.229821512 | 2.73058E-06 | FBgn0039896 |

|         |             |             |             |             |
|---------|-------------|-------------|-------------|-------------|
| GB55301 | 2.716066468 | 8.31352636  | 0.000118883 | FBgn0028926 |
| GB42981 | 2.706519228 | 8.004356003 | 7.86665E-05 | FBgn0040323 |
| GB44004 | 2.698176104 | 5.60360255  | 0.000111066 | FBgn0034490 |
| GB48310 | 2.663025852 | 6.741548061 | 4.50031E-06 | FBgn0038412 |
| GB51671 | 2.660067223 | 6.895700507 | 5.94299E-06 | FBgn0030869 |
| GB51043 | 2.658475665 | 4.840658171 | 0.004126054 | FBgn0023535 |
| GB45775 | 2.647172864 | 5.653590853 | 4.12857E-05 | FBgn0034166 |
| GB49347 | 2.646804705 | 7.507882973 | 0.000374385 | FBgn0033883 |
| GB46686 | 2.63666322  | 5.468266441 | 0.000352342 | FBgn0033913 |
| GB47849 | 2.636030572 | 6.945931314 | 1.14861E-05 | FBgn0038516 |
| GB55030 | 2.626156667 | 9.514312475 | 0.000294743 | FBgn0046706 |
| GB54294 | 2.624572817 | 5.862834833 | 9.86468E-05 | FBgn0035348 |
| GB46612 | 2.622684021 | 5.238617705 | 0.000766702 | FBgn0033936 |
| GB44214 | 2.607353117 | 5.3094762   | 0.000776189 | FBgn0014141 |
| GB50448 | 2.603610916 | 5.221109616 | 0.001317943 | FBgn0039804 |
| GB51760 | 2.596439784 | 6.449294165 | 3.91853E-05 | FBgn0000406 |
| GB45700 | 2.584759896 | 9.941366322 | 0.000256475 | FBgn0000533 |
| GB47931 | 2.580878762 | 5.949451167 | 0.000554292 | FBgn0036316 |
| GB45704 | 2.580535095 | 6.582661318 | 4.18476E-06 | FBgn0053229 |
| GB45495 | 2.569338515 | 10.76757841 | 0.001044578 | FBgn0001233 |
| GB40759 | 2.567027289 | 9.76696466  | 0.000303519 | FBgn0043841 |
| GB45023 | 2.560984255 | 7.957597226 | 0.000576877 | FBgn0032783 |
| GB54426 | 2.555802313 | 6.760187035 | 0.00054277  | FBgn0052512 |
| GB48436 | 2.553070412 | 6.966267642 | 3.49811E-05 | FBgn0002567 |
| GB53755 | 2.53613462  | 5.404760605 | 0.00214791  | FBgn0029690 |
| GB54367 | 2.526672508 | 5.44399183  | 0.000401296 | FBgn0030884 |
| GB52642 | 2.517995215 | 7.330431434 | 0.000129961 | FBgn0030251 |
| GB45688 | 2.502991125 | 9.480239392 | 0.000410478 | FBgn0033883 |
| GB48344 | 2.490873997 | 5.252127767 | 0.001316194 | FBgn0025631 |
| GB42865 | 2.477322888 | 5.884402353 | 6.91716E-05 | FBgn0036732 |
| GB53141 | 2.472892164 | 5.432213956 | 0.000858873 | FBgn0033786 |
| GB44055 | 2.457433333 | 6.815773339 | 5.76266E-05 | FBgn0000250 |
| GB52278 | 2.433821968 | 5.724753568 | 0.000193787 | FBgn0014141 |
| GB44005 | 2.429623831 | 7.030626515 | 3.31501E-05 | FBgn0034490 |
| GB53847 | 2.418863848 | 6.738710386 | 4.33397E-05 | FBgn0014906 |
| GB55302 | 2.405830756 | 9.922677681 | 0.001292035 | FBgn0033644 |
| GB47415 | 2.39670957  | 7.511485092 | 0.000199516 | FBgn0031538 |
| GB40119 | 2.392882241 | 5.159703574 | 0.002425712 | FBgn0016013 |
| GB49390 | 2.386039242 | 5.883652527 | 0.000128027 | FBgn0028341 |
| GB48029 | 2.384604432 | 6.317868198 | 2.72291E-05 | FBgn0032219 |
| GB49614 | 2.384604432 | 6.320680072 | 3.05957E-05 | FBgn0250732 |
| GB54947 | 2.372459096 | 5.136967775 | 0.002546551 | FBgn0036235 |
| GB47301 | 2.360979071 | 5.860047533 | 0.000172314 | FBgn0034605 |
| GB54611 | 2.358699399 | 9.999000011 | 0.00327764  | FBgn0028984 |
| GB40758 | 2.349981488 | 8.940914669 | 0.001214083 | FBgn0033926 |
| GB52191 | 2.349750735 | 8.112223775 | 0.000529251 | FBgn0051217 |
| GB50550 | 2.348813828 | 8.325083082 | 0.000854748 | 0           |
| GB40976 | 2.343726976 | 12.75568037 | 0.002416278 | FBgn0001233 |
| GB45676 | 2.335342058 | 5.815596697 | 0.000356876 | FBgn0035617 |
| GB42741 | 2.322183659 | 5.831294523 | 0.006734965 | FBgn0050496 |
| GB44344 | 2.320743845 | 7.3171673   | 0.000303519 | FBgn0053120 |
| GB45052 | 2.318334252 | 7.466221334 | 0.000674779 | FBgn0026376 |
| GB55590 | 2.313265837 | 8.948702798 | 0.000984127 | FBgn0025814 |
| GB42306 | 2.301308097 | 5.515299791 | 0.003829178 | FBgn0262526 |
| GB49688 | 2.300813162 | 9.051981537 | 0.001234944 | FBgn0004577 |
| GB50009 | 2.297087041 | 8.136106768 | 0.000916002 | FBgn0040532 |

|         |             |             |             |             |
|---------|-------------|-------------|-------------|-------------|
| GB47740 | 2.294473594 | 8.571132389 | 0.001350073 | FBgn0036995 |
| GB42625 | 2.270434407 | 6.278131791 | 0.003600892 | FBgn0037181 |
| GB43573 | 2.267880393 | 8.091034006 | 0.000781777 | FBgn0032638 |
| GB51551 | 2.256057294 | 8.122736192 | 0.000907988 | FBgn0035499 |
| GB41301 | 2.25051006  | 10.002739   | 0.001571369 | FBgn0000083 |
| GB55016 | 2.234681772 | 10.37009001 | 0.001860511 | FBgn0033188 |
| GB55805 | 2.225654082 | 5.861241217 | 0.000348125 | FBgn0050118 |
| GB52115 | 2.221816296 | 8.204016578 | 0.002909478 | FBgn0025456 |
| GB52630 | 2.219595795 | 5.621702021 | 0.001137046 | FBgn0036101 |
| GB52341 | 2.211675855 | 6.855027618 | 0.000240767 | FBgn0013987 |
| GB47463 | 2.176956201 | 7.546175636 | 0.000902337 | FBgn0001104 |
| GB50421 | 2.176420837 | 10.94801288 | 0.00237264  | FBgn0000416 |
| GB43184 | 2.174915406 | 8.589329123 | 0.001871085 | FBgn0030245 |
| GB40735 | 2.169565228 | 9.74164176  | 0.002425712 | FBgn0000064 |
| GB50226 | 2.165916353 | 11.53103881 | 0.0032643   | FBgn0022355 |
| GB51665 | 2.160479924 | 8.196623377 | 0.001402126 | FBgn0032074 |
| GB48598 | 2.155966648 | 6.679099249 | 0.000226763 | FBgn0011674 |
| GB55070 | 2.154799145 | 6.426744375 | 0.000410478 | FBgn0027843 |
| GB41549 | 2.153648591 | 5.835222283 | 0.000309466 | FBgn0011837 |
| GB40603 | 2.14793718  | 6.290809779 | 0.000139549 | FBgn0022800 |
| GB47104 | 2.141115287 | 8.349209133 | 0.002181123 | FBgn0034162 |
| GB55998 | 2.138770069 | 6.355442651 | 0.000217748 | FBgn0027538 |
| GB50043 | 2.124181108 | 6.786804347 | 0.000322647 | FBgn0259178 |
| GB47478 | 2.121335319 | 8.47788912  | 0.001693785 | FBgn0035438 |
| GB51741 | 2.119083862 | 7.55919038  | 0.001189737 | FBgn0030310 |
| GB41735 | 2.085295603 | 7.458408646 | 0.001577252 | FBgn0036565 |
| GB42329 | 2.059314509 | 7.419998288 | 0.001598201 | FBgn0262975 |
| GB44710 | 2.046556545 | 7.091841322 | 0.002063658 | FBgn0037684 |
| GB50149 | 2.046556545 | 7.08451977  | 0.004698561 | FBgn0040827 |
| GB43784 | 2.046334226 | 6.281829265 | 0.000379969 | FBgn0035770 |
| GB43572 | 2.045306967 | 8.346630067 | 0.002738623 | FBgn0015575 |
| GB49657 | 2.019613289 | 7.118640227 | 0.00292614  | FBgn0004606 |
| GB41225 | 2.012960764 | 6.313732562 | 0.000338009 | FBgn0033635 |
| GB55511 | 2.00121697  | 6.138309604 | 0.000681667 | FBgn0031461 |
| GB42685 | 2.000744467 | 6.875593175 | 0.001871085 | FBgn0040323 |
| GB46537 | 1.99891572  | 6.400803192 | 0.000545774 | FBgn0000477 |
| GB48626 | 1.992228673 | 7.371940057 | 0.006077124 | FBgn0031528 |
| GB53401 | 1.970447656 | 6.410395201 | 0.000641794 | FBgn0028550 |
| GB42084 | 1.965722966 | 6.880210306 | 0.000738543 | FBgn0035132 |
| GB41388 | 1.962230298 | 6.560382733 | 0.000851409 | FBgn0001128 |
| GB50418 | 1.962140154 | 6.889174122 | 0.001860511 | FBgn0262473 |
| GB43945 | 1.946903128 | 6.420583842 | 0.000538417 | FBgn0061200 |
| GB50136 | 1.940316455 | 8.75173772  | 0.009068093 | FBgn0037007 |
| GB42616 | 1.932141135 | 6.789666579 | 0.004348582 | FBgn0041629 |
| GB49259 | 1.932043893 | 7.7198349   | 0.018005284 | FBgn0030872 |
| GB42142 | 1.922952246 | 5.956072493 | 0.001416845 | FBgn0001078 |
| GB44143 | 1.920585251 | 6.620419805 | 0.005320678 | FBgn0037022 |
| GB47880 | 1.91872998  | 9.166710401 | 0.008632417 | FBgn0003462 |
| GB44976 | 1.913210764 | 6.193478188 | 0.001292035 | FBgn0016076 |
| GB48634 | 1.912544229 | 9.179991969 | 0.00760188  | FBgn0035438 |
| GB47310 | 1.910070789 | 6.369419152 | 0.00110543  | FBgn0030791 |
| GB40565 | 1.90599151  | 6.403210615 | 0.000766702 | FBgn0262866 |
| GB45497 | 1.898342109 | 7.041388227 | 0.003828187 | FBgn0050296 |
| GB49123 | 1.895946761 | 6.915911053 | 0.003239973 | FBgn0035719 |
| GB53805 | 1.886414345 | 6.510956601 | 0.001139971 | FBgn0038098 |
| GB41807 | 1.875536478 | 8.324370726 | 0.007167109 | FBgn0030740 |

|         |              |             |             |             |
|---------|--------------|-------------|-------------|-------------|
| GB55096 | 1.868914857  | 9.325395098 | 0.009578195 | FBgn0002719 |
| GB46276 | 1.868050528  | 8.437423948 | 0.007728444 | FBgn0033799 |
| GB45973 | 1.864908068  | 6.61382532  | 0.018411106 | FBgn0000422 |
| GB44100 | 1.863882962  | 6.243064537 | 0.000931191 | FBgn0013733 |
| GB42738 | 1.859629136  | 6.150468026 | 0.001639531 | FBgn0011204 |
| GB51210 | 1.844169622  | 7.069888074 | 0.005320678 | FBgn0039492 |
| GB41604 | 1.835490013  | 8.116479786 | 0.009038786 | FBgn0030529 |
| GB47565 | 1.812195243  | 9.361499589 | 0.024241963 | FBgn0023095 |
| GB44882 | 1.803122677  | 7.185970936 | 0.00701291  | FBgn0035094 |
| GB49607 | 1.787752204  | 9.993790073 | 0.01456849  | FBgn0032949 |
| GB42141 | 1.786718732  | 9.737369855 | 0.015604466 | FBgn0035811 |
| GB55482 | 1.784194224  | 7.375680788 | 0.008559697 | FBgn0010620 |
| GB45617 | 1.777496369  | 6.954969592 | 0.00548385  | FBgn0028343 |
| GB45736 | 1.776791168  | 7.771882062 | 0.010624785 | FBgn0016693 |
| GB49826 | 1.764792548  | 7.297210639 | 0.015265522 | FBgn0037612 |
| GB43708 | 1.745131927  | 12.45255587 | 0.01834029  | FBgn0015221 |
| GB52158 | 1.74331546   | 6.781420946 | 0.008605342 | FBgn0031975 |
| GB45135 | 1.742244954  | 6.910040695 | 0.005555039 | FBgn0028982 |
| GB43302 | 1.724826988  | 9.279614225 | 0.019986414 | FBgn0026562 |
| GB42500 | 1.723433871  | 6.751519509 | 0.004641824 | FBgn0035976 |
| GB40866 | 1.720461906  | 13.22053821 | 0.021345151 | FBgn0001219 |
| GB53830 | 1.700732034  | 7.860928987 | 0.02160631  | FBgn0039728 |
| GB47201 | 1.68586055   | 8.667132058 | 0.02062881  | FBgn0004657 |
| GB53831 | 1.682786195  | 7.499630232 | 0.021476733 | FBgn0033382 |
| GB48853 | 1.667454286  | 7.758830587 | 0.02042266  | FBgn0032456 |
| GB45147 | 1.657843662  | 8.927441415 | 0.027204902 | FBgn0031913 |
| GB53632 | 1.654916139  | 8.31961585  | 0.029570274 | FBgn0039257 |
| GB50970 | 1.653735966  | 9.49420017  | 0.024905514 | FBgn0040064 |
| GB47107 | 1.632996907  | 8.430379879 | 0.027106639 | FBgn0036165 |
| GB49240 | 1.630562532  | 7.542460778 | 0.019815253 | FBgn0012036 |
| GB42940 | 1.606339713  | 7.71791057  | 0.022977086 | FBgn0013305 |
| GB49260 | 1.604775797  | 10.30777817 | 0.030416071 | FBgn0262720 |
| GB40773 | 1.593589947  | 7.605255398 | 0.024241963 | FBgn0030485 |
| GB51029 | 1.570821358  | 7.049783016 | 0.022473566 | FBgn0004049 |
| GB46766 | 1.563398983  | 7.636379496 | 0.027380265 | FBgn0034577 |
| GB46984 | 1.562659594  | 7.139247625 | 0.019465125 | FBgn0086691 |
| GB41806 | 1.561418526  | 7.688315584 | 0.035853756 | FBgn0038088 |
| GB55426 | 1.559281449  | 8.697221788 | 0.039322274 | FBgn0087007 |
| GB41313 | 1.551176584  | 7.264888541 | 0.025714238 | FBgn0036501 |
| GB53540 | 1.544356833  | 6.9340229   | 0.02471976  | FBgn0263350 |
| GB52074 | 1.540553573  | 8.295490239 | 0.035138568 | FBgn0004654 |
| GB50931 | 1.522736871  | 7.291687904 | 0.031179281 | FBgn0003507 |
| GB52427 | 1.513327891  | 7.460006337 | 0.033264633 | FBgn0024238 |
| GB54331 | 1.503691419  | 10.21874237 | 0.046190762 | FBgn0013770 |
| GB48195 | 1.493162176  | 7.504298126 | 0.03407712  | FBgn0086687 |
| GB54863 | 1.467324303  | 7.624413296 | 0.045963195 | FBgn0250848 |
| GB50271 | 1.453861019  | 7.127277501 | 0.037694882 | FBgn0035432 |
| GB47955 | 1.4102668    | 7.239646669 | 0.047776084 | FBgn0005278 |
| GB48699 | -1.327444838 | 10.88358365 | 0.049799333 | FBgn0013325 |
| GB53219 | -1.363250112 | 10.59762065 | 0.037042583 | FBgn0005533 |
| GB40703 | -1.369339769 | 7.842591609 | 0.037617358 | FBgn0036715 |
| GB55643 | -1.390595132 | 8.155623553 | 0.029079321 | FBgn0016691 |
| GB42663 | -1.423332182 | 7.837554323 | 0.024241963 | FBgn0031066 |
| GB50683 | -1.425346407 | 7.569601357 | 0.027224549 | FBgn0037855 |
| GB55979 | -1.463666951 | 7.59376426  | 0.02042266  | FBgn0031528 |
| GB49177 | -1.482639722 | 10.34414547 | 0.022806701 | FBgn0039359 |

|         |              |             |             |             |
|---------|--------------|-------------|-------------|-------------|
| GB48929 | -1.485872747 | 8.158404089 | 0.023640263 | FBgn0020660 |
| GB55781 | -1.538202103 | 7.805063041 | 0.020555712 | FBgn0053196 |
| GB47650 | -1.548547023 | 8.534401336 | 0.012229552 | FBgn0023170 |
| GB48454 | -1.576819997 | 7.623393263 | 0.011641998 | FBgn0000108 |
| GB45152 | -1.577120029 | 10.69043703 | 0.012644294 | FBgn0261341 |
| GB47938 | -1.580311422 | 8.31249236  | 0.011759668 | FBgn0031879 |
| GB52997 | -1.602972421 | 7.378934345 | 0.008996253 | FBgn0262110 |
| GB41633 | -1.610841162 | 7.902875621 | 0.008237535 | FBgn0016120 |
| GB46776 | -1.629293044 | 10.44334748 | 0.008469441 | FBgn0033699 |
| GB54570 | -1.631076214 | 7.187397513 | 0.004859238 | FBgn0034697 |
| GB48837 | -1.640712086 | 7.738980989 | 0.01257857  | FBgn0039008 |
| GB40445 | -1.651548696 | 9.071397639 | 0.007979069 | FBgn0031918 |
| GB44903 | -1.662306724 | 7.607081978 | 0.007144354 | FBgn0015614 |
| GB43198 | -1.673635116 | 7.214867154 | 0.013178234 | FBgn0000667 |
| GB41143 | -1.68710428  | 7.76379005  | 0.005165162 | FBgn0037001 |
| GB40808 | -1.69147899  | 7.221097611 | 0.005560661 | FBgn0029688 |
| GB51342 | -1.699523814 | 7.277006744 | 0.003606574 | FBgn0014023 |
| GB53946 | -1.70112752  | 7.500089854 | 0.006039552 | FBgn0040793 |
| GB44558 | -1.71323322  | 6.988623429 | 0.003157565 | FBgn0036691 |
| GB41973 | -1.718220817 | 6.999806583 | 0.004675231 | FBgn0037843 |
| GB50101 | -1.730857515 | 6.981502715 | 0.003751145 | FBgn0039594 |
| GB41625 | -1.744719583 | 8.219231196 | 0.004365864 | FBgn0035844 |
| GB46268 | -1.744745329 | 7.947946983 | 0.004326957 | FBgn0024183 |
| GB54384 | -1.744892888 | 6.977913322 | 0.002183164 | FBgn0033961 |
| GB50061 | -1.754792337 | 7.15499818  | 0.003499097 | FBgn0001321 |
| GB53090 | -1.759010734 | 6.690276333 | 0.000707447 | FBgn0036557 |
| GB40395 | -1.768454405 | 8.077029823 | 0.002535696 | FBgn0045866 |
| GB45635 | -1.770523765 | 6.637259466 | 0.000905021 | FBgn0035122 |
| GB44897 | -1.773856107 | 8.085985375 | 0.003133764 | FBgn0259749 |
| GB44693 | -1.792102917 | 8.834483716 | 0.003081169 | FBgn0034259 |
| GB55683 | -1.794075067 | 6.896817134 | 0.001616529 | FBgn0010808 |
| GB54555 | -1.816099585 | 6.727112349 | 0.000528514 | FBgn0039868 |
| GB55568 | -1.816139814 | 6.974157839 | 0.002782362 | FBgn0038742 |
| GB49106 | -1.818677504 | 8.070768253 | 0.002846594 | FBgn0250789 |
| GB40203 | -1.829177837 | 6.899524167 | 0.002368222 | FBgn0051028 |
| GB49764 | -1.850309995 | 6.526245801 | 0.001871085 | FBgn0261277 |
| GB45937 | -1.856422072 | 7.23144863  | 0.002446304 | FBgn0013765 |
| GB42612 | -1.861726346 | 8.043755331 | 0.00310255  | FBgn0033603 |
| GB41270 | -1.87908515  | 8.918880193 | 0.002655037 | FBgn0026077 |
| GB45434 | -1.880270003 | 8.29373075  | 0.001139971 | FBgn0010612 |
| GB50690 | -1.883889523 | 6.751875806 | 0.001616529 | FBgn0261397 |
| GB55479 | -1.887724811 | 6.45671869  | 0.000220327 | FBgn0041249 |
| GB43540 | -1.8930137   | 9.282847178 | 0.00132543  | FBgn0263968 |
| GB53749 | -1.89652136  | 7.952231743 | 0.001717837 | FBgn0034877 |
| GB52783 | -1.897388443 | 6.71434863  | 0.000476527 | FBgn0039635 |
| GB48641 | -1.898193368 | 6.662381957 | 0.00021562  | FBgn0038319 |
| GB44033 | -1.918487822 | 10.37756029 | 0.001175091 | FBgn0031980 |
| GB51802 | -1.920689465 | 6.500179334 | 0.00021562  | FBgn0052043 |
| GB51736 | -1.923372993 | 7.270995208 | 0.002113821 | FBgn0031957 |
| GB43629 | -1.924315757 | 7.155379058 | 0.000582404 | FBgn0021967 |
| GB54652 | -1.924730834 | 7.125572062 | 0.000479526 | FBgn0039765 |
| GB55782 | -1.934223396 | 7.022741874 | 0.000454107 | FBgn0033570 |
| GB48813 | -1.936109648 | 6.461443998 | 0.014658972 | FBgn0066365 |
| GB41648 | -1.939356311 | 6.535216371 | 0.000193891 | FBgn0067317 |
| GB49534 | -1.951877034 | 8.999321683 | 0.001127394 | FBgn0027341 |
| GB40399 | -1.953686703 | 6.7458885   | 0.000410478 | FBgn0260858 |

|         |              |             |             |             |
|---------|--------------|-------------|-------------|-------------|
| GB41068 | -1.955110285 | 6.710628368 | 0.000476224 | FBgn0011787 |
| GB42804 | -1.956128419 | 7.364023124 | 0.001005659 | FBgn0033192 |
| GB45947 | -1.956267069 | 6.651345355 | 0.000237911 | FBgn0024841 |
| GB40590 | -1.972622495 | 6.236169824 | 7.80187E-05 | FBgn0031766 |
| GB49095 | -1.987035349 | 6.406239472 | 0.000583685 | FBgn0062413 |
| GB54643 | -1.991722581 | 7.128314461 | 0.001218771 | FBgn0019960 |
| GB41855 | -1.993220557 | 6.325275188 | 0.000881531 | FBgn0262867 |
| GB44891 | -1.993739068 | 6.551814366 | 9.80306E-05 | FBgn0039212 |
| GB50918 | -1.993739068 | 6.544386563 | 0.00015965  | FBgn0031684 |
| GB53270 | -1.993805737 | 6.298691719 | 8.32812E-05 | FBgn0028919 |
| GB55477 | -1.994038277 | 6.904135599 | 0.000440769 | FBgn0037608 |
| GB54387 | -1.994864087 | 6.836771804 | 0.000195252 | FBgn0037899 |
| GB40801 | -1.995736326 | 6.368149564 | 0.000228634 | FBgn0031601 |
| GB51063 | -2.005613145 | 8.178295473 | 0.00186094  | FBgn0051973 |
| GB47177 | -2.01509367  | 6.483922425 | 0.000204549 | FBgn0037549 |
| GB51624 | -2.036551913 | 6.220710894 | 3.87952E-05 | FBgn0035534 |
| GB45866 | -2.039018995 | 6.641424207 | 0.000146784 | FBgn0035374 |
| GB46701 | -2.042819624 | 6.187027126 | 0.000656429 | FBgn0051204 |
| GB51046 | -2.043656088 | 8.15185693  | 0.000382158 | FBgn0030306 |
| GB40492 | -2.046547606 | 9.389756125 | 0.000545774 | FBgn0030616 |
| GB43231 | -2.055355765 | 6.484074961 | 0.001311303 | FBgn0035888 |
| GB47181 | -2.063791899 | 7.246100332 | 0.000241296 | FBgn0031021 |
| GB44608 | -2.064102759 | 6.728001446 | 6.36255E-05 | FBgn0034645 |
| GB54100 | -2.073655376 | 6.320368922 | 5.99018E-05 | FBgn0035469 |
| GB41290 | -2.080193511 | 6.61506416  | 0.000273139 | FBgn0051224 |
| GB52250 | -2.090185876 | 6.287093548 | 0.0001693   | FBgn0260390 |
| GB54213 | -2.094526184 | 6.660265818 | 0.000769605 | FBgn0052000 |
| GB49086 | -2.095023607 | 6.253072887 | 3.73114E-05 | FBgn0030407 |
| GB51900 | -2.099932668 | 6.394800866 | 3.81338E-05 | FBgn0038746 |
| GB54976 | -2.101047419 | 7.009273988 | 0.000232481 | FBgn0034791 |
| GB43482 | -2.101168343 | 8.739559502 | 0.000363242 | FBgn0019644 |
| GB47886 | -2.103446087 | 6.198466192 | 3.53139E-05 | FBgn0037172 |
| GB41203 | -2.105655541 | 10.10120513 | 0.000781777 | FBgn0026077 |
| GB42239 | -2.109459995 | 6.629599548 | 0.000434788 | FBgn0034943 |
| GB49930 | -2.1106919   | 6.383539506 | 0.000240975 | FBgn0028491 |
| GB40609 | -2.114191625 | 6.775124848 | 0.001356693 | FBgn0039210 |
| GB52644 | -2.117394849 | 7.699431156 | 0.000223644 | FBgn0016119 |
| GB55912 | -2.11783314  | 7.10555769  | 0.000319475 | FBgn0026059 |
| GB48981 | -2.117848556 | 7.093599292 | 0.000188126 | FBgn0034517 |
| GB51993 | -2.134383112 | 5.972897504 | 4.93042E-05 | FBgn0035592 |
| GB48293 | -2.135958195 | 6.668844597 | 2.85351E-05 | FBgn0039159 |
| GB55275 | -2.138407407 | 7.379969028 | 0.000204549 | FBgn0036289 |
| GB53661 | -2.142892574 | 6.856751424 | 6.28793E-05 | FBgn0035247 |
| GB51722 | -2.149026991 | 6.654701239 | 0.000314656 | FBgn0035936 |
| GB52446 | -2.159959684 | 5.954090664 | 0.000473346 | FBgn0020300 |
| GB54390 | -2.16300256  | 6.174222105 | 0.000264503 | FBgn0025393 |
| GB46748 | -2.164125783 | 6.687574327 | 2.25596E-05 | FBgn0034579 |
| GB41308 | -2.176512885 | 7.746175833 | 0.000432674 | FBgn0000046 |
| GB41196 | -2.194717298 | 6.221473967 | 0.000311892 | FBgn0023518 |
| GB40489 | -2.203309252 | 7.857514451 | 0.00010017  | FBgn0019957 |
| GB49584 | -2.210317886 | 6.936805205 | 8.30743E-05 | FBgn0086712 |
| GB51581 | -2.211105611 | 6.739534739 | 1.96492E-05 | FBgn0034854 |
| GB43808 | -2.220674652 | 6.419748485 | 1.97541E-05 | FBgn0036237 |
| GB40462 | -2.22478701  | 7.693913988 | 0.000843204 | FBgn0040773 |
| GB52028 | -2.233168682 | 8.04126268  | 0.00017091  | FBgn0000556 |
| GB53716 | -2.234076402 | 6.040797924 | 2.27241E-05 | FBgn0033887 |

|         |              |             |             |             |
|---------|--------------|-------------|-------------|-------------|
| GB53568 | -2.241777581 | 7.776351144 | 0.000545774 | FBgn0263911 |
| GB43187 | -2.244182503 | 6.137476614 | 5.19374E-05 | FBgn0085468 |
| GB54450 | -2.258160605 | 6.310785979 | 3.04087E-06 | FBgn0038302 |
| GB47224 | -2.279644376 | 6.811014507 | 0.000125079 | FBgn0000568 |
| GB49283 | -2.281488415 | 6.337188781 | 0.000255734 | FBgn0036398 |
| GB50335 | -2.281543905 | 7.067360976 | 2.59557E-05 | FBgn0050354 |
| GB49115 | -2.287965406 | 6.475361587 | 4.58254E-05 | FBgn0062413 |
| GB53947 | -2.290639292 | 6.200375563 | 2.95564E-06 | FBgn0037890 |
| GB47948 | -2.29592373  | 5.91802964  | 0.000303519 | FBgn0013988 |
| GB54469 | -2.299685305 | 6.135751171 | 3.68958E-06 | FBgn0035980 |
| GB54483 | -2.301175387 | 6.713438258 | 8.15091E-05 | FBgn0035539 |
| GB46272 | -2.302988585 | 6.025985801 | 4.85932E-05 | FBgn0085220 |
| GB42487 | -2.30327337  | 6.667148487 | 7.91422E-05 | FBgn0260450 |
| GB42493 | -2.303778516 | 6.38777502  | 0.000201287 | FBgn0028573 |
| GB51623 | -2.304205359 | 6.226640836 | 1.02957E-05 | FBgn0033754 |
| GB50167 | -2.310793402 | 6.332362377 | 5.84154E-06 | FBgn0036774 |
| GB51539 | -2.312899375 | 6.543714921 | 3.91262E-06 | FBgn0034986 |
| GB56016 | -2.315243541 | 6.735362318 | 1.59195E-05 | FBgn0029718 |
| GB47977 | -2.315413909 | 9.214539552 | 0.000123866 | FBgn0086906 |
| GB44842 | -2.319819128 | 6.250950685 | 6.33006E-05 | FBgn0082582 |
| GB42015 | -2.323513171 | 6.305102858 | 1.0575E-05  | FBgn0037838 |
| GB55615 | -2.32815251  | 7.717337388 | 9.2716E-05  | FBgn0034860 |
| GB40653 | -2.331448137 | 10.20202733 | 3.33157E-05 | FBgn0032518 |
| GB40892 | -2.33564666  | 6.219968874 | 5.49594E-06 | FBgn0260401 |
| GB41359 | -2.336976019 | 7.083929872 | 2.44089E-05 | FBgn0044030 |
| GB50866 | -2.338051364 | 7.156303537 | 4.73211E-05 | FBgn0010435 |
| GB51800 | -2.342204678 | 7.934640946 | 2.99906E-05 | FBgn0015903 |
| GB53970 | -2.350284061 | 7.709353303 | 5.48946E-05 | FBgn0035574 |
| GB50032 | -2.351654347 | 7.286542131 | 2.59557E-05 | FBgn0036918 |
| GB53343 | -2.352292943 | 5.926609882 | 0.000108964 | FBgn0043903 |
| GB47176 | -2.359428678 | 5.958883753 | 1.33584E-05 | FBgn0033480 |
| GB54818 | -2.366398724 | 6.400012502 | 0.000116718 | FBgn0014863 |
| GB55359 | -2.370622729 | 7.082714137 | 7.46977E-05 | FBgn0036365 |
| GB55765 | -2.374123613 | 5.900184049 | 0.00011146  | FBgn0000442 |
| GB45025 | -2.382086243 | 7.296240822 | 1.21906E-05 | FBgn0037008 |
| GB54301 | -2.383153675 | 6.797763151 | 2.76981E-05 | FBgn0030605 |
| GB48484 | -2.385013236 | 6.249695502 | 3.99921E-06 | FBgn0038426 |
| GB48958 | -2.401392805 | 7.096421159 | 7.07342E-06 | FBgn0040931 |
| GB44426 | -2.401486762 | 6.189078487 | 5.45762E-06 | FBgn0037537 |
| GB42959 | -2.405396576 | 6.087335681 | 2.21035E-06 | FBgn0000183 |
| GB46785 | -2.422003117 | 5.770666183 | 1.61317E-05 | FBgn0037378 |
| GB42661 | -2.426742479 | 6.05473006  | 3.55979E-06 | FBgn0051759 |
| GB44647 | -2.433341878 | 5.561726195 | 2.56491E-05 | FBgn0261999 |
| GB42043 | -2.448572808 | 7.088964141 | 5.49594E-06 | FBgn0051159 |
| GB43552 | -2.459583615 | 6.775844557 | 2.27941E-05 | FBgn0035575 |
| GB43537 | -2.476993401 | 6.512585596 | 9.50989E-07 | FBgn0033907 |
| GB50601 | -2.477980804 | 8.365990527 | 1.00241E-05 | FBgn0038224 |
| GB53010 | -2.485588641 | 8.212184749 | 1.38664E-05 | FBgn0037579 |
| GB44798 | -2.492948271 | 6.801002617 | 1.9578E-05  | FBgn0034797 |
| GB47199 | -2.496099205 | 6.485890188 | 3.33361E-06 | FBgn0010222 |
| GB44223 | -2.497194833 | 6.772154862 | 8.93519E-05 | FBgn0027611 |
| GB50441 | -2.500151858 | 7.279213552 | 9.94927E-05 | FBgn0038405 |
| GB51206 | -2.514970453 | 8.026933571 | 5.32838E-06 | FBgn0015031 |
| GB46817 | -2.518110643 | 8.987894543 | 0.000303519 | FBgn0053257 |
| GB47499 | -2.522018828 | 7.134204358 | 1.38577E-05 | FBgn0085384 |
| GB51118 | -2.523640049 | 6.714843451 | 6.42768E-07 | FBgn0034361 |

|         |              |             |             |             |
|---------|--------------|-------------|-------------|-------------|
| GB45211 | -2.541351588 | 7.791927538 | 4.15675E-05 | FBgn0010423 |
| GB46793 | -2.542284778 | 6.067317301 | 4.22213E-07 | FBgn0050185 |
| GB49223 | -2.547785391 | 6.909813745 | 1.79236E-05 | FBgn0259108 |
| GB40032 | -2.564658255 | 6.321488476 | 1.59477E-07 | FBgn0031361 |
| GB44799 | -2.582162344 | 6.386023953 | 8.46454E-07 | FBgn0030060 |
| GB53331 | -2.590075421 | 6.06159362  | 8.28606E-06 | FBgn0039294 |
| GB54921 | -2.590870715 | 5.662195266 | 1.39601E-05 | FBgn0037487 |
| GB43639 | -2.594196819 | 6.058466283 | 2.97378E-07 | FBgn0034939 |
| GB53037 | -2.615824187 | 5.813323295 | 1.73849E-06 | FBgn0038662 |
| GB45364 | -2.618481269 | 5.98304064  | 1.37662E-05 | FBgn0261509 |
| GB47838 | -2.619566077 | 7.32339512  | 4.21639E-06 | FBgn0034974 |
| GB50453 | -2.628743472 | 5.714259966 | 1.31136E-06 | FBgn0039805 |
| GB45771 | -2.647086965 | 5.391141542 | 4.31901E-06 | 0           |
| GB50928 | -2.650007597 | 5.826799719 | 2.14019E-06 | FBgn0040389 |
| GB53539 | -2.650797103 | 6.001591672 | 2.93434E-07 | FBgn0039764 |
| GB50564 | -2.657368997 | 6.339313152 | 0.000665942 | FBgn0027527 |
| GB40503 | -2.661300986 | 7.888547787 | 3.08312E-06 | FBgn0032350 |
| GB40165 | -2.662325239 | 9.44743991  | 1.76467E-05 | FBgn0003065 |
| GB55944 | -2.666048809 | 5.67860226  | 1.30113E-06 | FBgn0038323 |
| GB44931 | -2.668121049 | 5.371804711 | 2.44089E-05 | FBgn0028436 |
| GB55650 | -2.711235687 | 6.388321009 | 4.03841E-06 | FBgn0011286 |
| GB48709 | -2.716039207 | 5.513522176 | 2.13466E-06 | FBgn0033061 |
| GB50870 | -2.723194763 | 6.107715415 | 5.40693E-08 | FBgn0034001 |
| GB40008 | -2.724047522 | 5.912785795 | 8.11535E-06 | FBgn0261836 |
| GB45629 | -2.727727066 | 8.484376572 | 1.01117E-06 | FBgn0031228 |
| GB44452 | -2.734678797 | 5.967633348 | 7.86523E-06 | FBgn0032803 |
| GB53319 | -2.737980666 | 6.507838312 | 6.02772E-06 | FBgn0034301 |
| GB50408 | -2.738123565 | 6.938124704 | 5.59792E-07 | FBgn0036726 |
| GB48007 | -2.739150814 | 7.164906122 | 7.07342E-06 | FBgn0034412 |
| GB51003 | -2.73935178  | 6.341890865 | 9.43215E-09 | FBgn0051913 |
| GB43983 | -2.772249722 | 5.747104069 | 8.46454E-07 | FBgn0030617 |
| GB49308 | -2.776118138 | 6.96703872  | 3.52045E-07 | FBgn0085638 |
| GB47976 | -2.779899719 | 5.244101425 | 2.96901E-06 | FBgn0035308 |
| GB51442 | -2.782066374 | 6.568064169 | 9.92973E-06 | FBgn0052036 |
| GB54743 | -2.785944684 | 5.715363837 | 1.91639E-07 | FBgn0004959 |
| GB50000 | -2.794144374 | 8.122885689 | 1.31136E-06 | FBgn0032453 |
| GB42903 | -2.800808794 | 5.699963119 | 0.011886599 | FBgn0045443 |
| GB40842 | -2.804291229 | 6.45835156  | 1.21615E-06 | FBgn0001112 |
| GB42821 | -2.819438428 | 6.766229864 | 1.47919E-08 | FBgn0036581 |
| GB42427 | -2.823251105 | 7.314929786 | 2.21031E-06 | FBgn0039640 |
| GB45122 | -2.830463095 | 5.6541747   | 1.40656E-06 | FBgn0029514 |
| GB48858 | -2.845565689 | 7.056638886 | 2.36839E-06 | FBgn0040601 |
| GB41656 | -2.848514787 | 5.253222116 | 1.33715E-05 | FBgn0069913 |
| GB45149 | -2.855752934 | 6.102082653 | 5.81023E-06 | FBgn0032785 |
| GB55225 | -2.865152577 | 6.681832153 | 6.06324E-07 | FBgn0001083 |
| GB44683 | -2.865232759 | 7.916433103 | 2.77709E-06 | FBgn0250838 |
| GB45609 | -2.883699026 | 6.765898859 | 1.62619E-05 | FBgn0033079 |
| GB52025 | -2.912701929 | 7.366243705 | 4.91814E-07 | FBgn0027570 |
| GB40862 | -2.914197837 | 5.930529863 | 3.81791E-08 | FBgn0033085 |
| GB50236 | -2.915624423 | 5.633878009 | 0.000382158 | FBgn0035788 |
| GB46975 | -2.922234984 | 5.409125246 | 0.000344162 | FBgn0002183 |
| GB55547 | -2.924836575 | 7.033456504 | 8.02485E-06 | FBgn0050172 |
| GB47822 | -2.929972888 | 5.575523877 | 1.30113E-06 | FBgn0034726 |
| GB47990 | -2.93398     | 6.618919424 | 1.35977E-06 | FBgn0004117 |
| GB47321 | -2.969859969 | 6.572023746 | 6.47462E-09 | FBgn0039111 |
| GB50660 | -2.972867621 | 5.631393875 | 1.92519E-07 | FBgn0036995 |



|         |              |             |             |             |
|---------|--------------|-------------|-------------|-------------|
| GB52690 | -2.976273653 | 5.13811868  | 1.52693E-05 | FBgn0033100 |
| GB50981 | -2.981433837 | 5.529320857 | 1.7797E-06  | FBgn0035169 |
| GB50567 | -2.982847553 | 6.306674881 | 3.52045E-07 | FBgn0037416 |
| GB42062 | -2.985213007 | 7.818538337 | 8.53372E-07 | FBgn0039527 |
| GB50171 | -2.985773889 | 6.206905787 | 6.975E-07   | FBgn0262717 |
| GB45188 | -2.992875536 | 6.712056213 | 1.37209E-07 | FBgn0031630 |
| GB54775 | -2.997157715 | 8.022691908 | 3.39643E-07 | FBgn0030027 |
| GB55231 | -3.007833322 | 6.182566338 | 2.10028E-07 | FBgn0033602 |
| GB40446 | -3.034039497 | 6.15031963  | 2.34413E-07 | FBgn0033869 |
| GB55298 | -3.055273971 | 6.345242246 | 2.91708E-09 | FBgn0011227 |
| GB51560 | -3.066020896 | 8.674698329 | 1.00812E-07 | FBgn0034022 |
| GB49275 | -3.070203161 | 5.118221432 | 3.77562E-06 | FBgn0038837 |
| GB53345 | -3.077139359 | 7.708070269 | 1.09853E-07 | FBgn0037217 |
| GB44832 | -3.091437957 | 5.549782504 | 1.82451E-07 | FBgn0038629 |
| GB46705 | -3.097710079 | 7.563248322 | 1.09993E-06 | FBgn0053519 |
| GB51482 | -3.104783177 | 6.524094003 | 1.82304E-07 | FBgn0085446 |
| GB43052 | -3.122878124 | 7.7019461   | 5.08634E-07 | FBgn0003149 |
| GB55403 | -3.129093939 | 6.054023098 | 1.09979E-07 | FBgn0259994 |
| GB47082 | -3.137611276 | 5.394602557 | 4.12206E-07 | FBgn0030660 |
| GB43465 | -3.14961518  | 5.824160482 | 5.69386E-08 | FBgn0039208 |
| GB41945 | -3.158678937 | 6.643498856 | 1.87254E-07 | FBgn0031097 |
| GB41306 | -3.15891823  | 7.730512009 | 5.59792E-07 | FBgn0000046 |
| GB43892 | -3.161350777 | 7.307320155 | 5.13363E-08 | FBgn0032945 |
| GB46298 | -3.20783493  | 6.141627604 | 1.90327E-06 | FBgn0033728 |
| GB45553 | -3.211942463 | 5.130911944 | 5.4835E-07  | FBgn0034157 |
| GB47037 | -3.230666843 | 6.813651649 | 1.06496E-07 | FBgn0264562 |
| GB49639 | -3.23320562  | 6.692633924 | 8.10694E-07 | FBgn0039648 |
| GB49080 | -3.257814369 | 7.757744553 | 3.90859E-08 | FBgn0052645 |
| GB48125 | -3.294743104 | 6.040281701 | 1.88243E-07 | FBgn0031869 |
| GB50973 | -3.311391598 | 6.113710684 | 2.4472E-07  | FBgn0036044 |
| GB41310 | -3.314256815 | 8.625245921 | 9.068E-09   | FBgn0000046 |
| GB55729 | -3.330238004 | 6.15063216  | 1.58278E-08 | FBgn0041712 |
| GB42892 | -3.348568288 | 4.951402041 | 6.96439E-07 | FBgn0004650 |
| GB42303 | -3.364162017 | 5.654384733 | 5.26425E-08 | FBgn0052816 |
| GB47906 | -3.394451082 | 8.82793568  | 2.44953E-09 | FBgn0033731 |
| GB44209 | -3.395423774 | 8.215981342 | 4.1665E-09  | FBgn0037537 |
| GB51901 | -3.395605373 | 6.195743078 | 1.90556E-08 | FBgn0052645 |
| GB54393 | -3.398159455 | 6.200558129 | 1.26666E-08 | FBgn0031646 |
| GB41723 | -3.4124176   | 7.90697497  | 1.60796E-09 | FBgn0261269 |
| GB42206 | -3.413615738 | 5.993259911 | 1.60084E-07 | FBgn0260856 |
| GB52723 | -3.429080356 | 5.695670408 | 4.0651E-08  | FBgn0262647 |
| GB43053 | -3.446057825 | 7.52937411  | 5.45541E-08 | FBgn0003149 |
| GB50566 | -3.462873495 | 6.028320282 | 0.000641464 | FBgn0037415 |
| GB41311 | -3.485890491 | 7.463354007 | 5.0934E-09  | FBgn0000045 |
| GB48167 | -3.48721605  | 6.733726181 | 1.6683E-08  | FBgn0262508 |
| GB43691 | -3.489520401 | 5.987545861 | 3.63168E-08 | FBgn0038017 |
| GB55325 | -3.491202857 | 5.734348621 | 6.34476E-08 | FBgn0003721 |
| GB44222 | -3.494020601 | 6.37587391  | 7.67195E-08 | FBgn0039897 |
| GB40007 | -3.494609496 | 5.214767521 | 5.21119E-08 | FBgn0261836 |
| GB54302 | -3.516694832 | 5.020214805 | 3.09066E-06 | FBgn0038986 |
| GB54750 | -3.523856586 | 4.896540821 | 1.0459E-06  | FBgn0259226 |
| GB47669 | -3.527785298 | 11.00058167 | 1.09221E-10 | FBgn0015766 |
| GB41622 | -3.588230139 | 4.584139451 | 0.00237264  | FBgn0035429 |
| GB50565 | -3.589764369 | 6.569122076 | 0.000380353 | FBgn0037414 |
| GB54884 | -3.600956023 | 8.209769842 | 2.15865E-10 | FBgn0053978 |
| GB41241 | -3.603548881 | 4.816428302 | 2.26867E-07 | FBgn0033633 |

|         |              |             |             |             |
|---------|--------------|-------------|-------------|-------------|
| GB55158 | -3.630864245 | 5.848075475 | 1.28464E-08 | FBgn0027495 |
| GB55598 | -3.651894415 | 7.64948384  | 7.06927E-09 | FBgn0004028 |
| GB43029 | -3.665056301 | 7.577843955 | 1.515E-08   | FBgn0000047 |
| GB53675 | -3.710591707 | 5.225246373 | 2.35955E-08 | FBgn0031999 |
| GB53407 | -3.711856244 | 4.860016686 | 0.003898501 | FBgn0053196 |
| GB42769 | -3.713678312 | 9.88287298  | 5.75596E-11 | FBgn0038405 |
| GB42594 | -3.719827475 | 5.657822076 | 2.13441E-10 | FBgn0036834 |
| GB55617 | -3.731780256 | 5.290328005 | 7.47773E-10 | FBgn0029836 |
| GB50170 | -3.738678998 | 7.309725846 | 9.09148E-11 | FBgn0262717 |
| GB50570 | -3.749245918 | 5.923129689 | 5.54174E-08 | FBgn0037419 |
| GB42908 | -3.768930456 | 4.738037636 | 0.000721067 | FBgn0039027 |
| GB41495 | -3.773615913 | 4.718074182 | 2.45462E-07 | FBgn0016693 |
| GB49734 | -3.783009876 | 5.046366287 | 1.4893E-06  | FBgn0260386 |
| GB52184 | -3.795852386 | 4.950805289 | 5.41282E-08 | 0           |
| GB52992 | -3.796249157 | 7.181362483 | 4.49039E-07 | FBgn0052354 |
| GB46310 | -3.835528529 | 6.489982557 | 1.19374E-10 | FBgn0000551 |
| GB42286 | -3.858578986 | 5.518490935 | 2.27746E-10 | FBgn0037122 |
| GB50450 | -3.867915962 | 8.997644356 | 1.36737E-08 | FBgn0001250 |
| GB55895 | -3.870528692 | 5.783159697 | 3.21261E-11 | FBgn0040705 |
| GB52824 | -3.878157771 | 5.170711189 | 4.37973E-08 | FBgn0033869 |
| GB40771 | -3.88630937  | 5.0328827   | 9.39491E-09 | FBgn0033763 |
| GB44777 | -3.89578203  | 8.477311239 | 3.59566E-11 | FBgn0032299 |
| GB40944 | -3.901497806 | 7.178151963 | 1.15084E-11 | FBgn0034903 |
| GB45938 | -3.904959886 | 4.789473503 | 3.00944E-07 | FBgn0000075 |
| GB53579 | -3.91558267  | 5.187899448 | 7.20211E-08 | FBgn0051148 |
| GB42891 | -3.961347935 | 6.769932348 | 2.16693E-10 | FBgn0024366 |
| GB46819 | -3.986463376 | 6.058862269 | 7.16887E-11 | FBgn0051296 |
| GB46415 | -4.010960389 | 4.434713722 | 0.000201628 | FBgn0035077 |
| GB41792 | -4.012031807 | 8.395892572 | 6.22006E-12 | FBgn0040601 |
| GB49646 | -4.040246107 | 6.444546277 | 2.38575E-11 | FBgn0038511 |
| GB50610 | -4.049362512 | 10.03049605 | 1.6804E-13  | FBgn0050101 |
| GB40604 | -4.062927958 | 4.992019164 | 9.91544E-05 | FBgn0261526 |
| GB45732 | -4.063791099 | 7.587378151 | 1.76722E-12 | FBgn0036486 |
| GB41946 | -4.069295233 | 7.849953515 | 1.43542E-12 | FBgn0022770 |
| GB43580 | -4.091344853 | 9.408747739 | 1.9951E-13  | FBgn0039126 |
| GB50439 | -4.098978607 | 8.406700205 | 5.67136E-11 | FBgn0039480 |
| GB42673 | -4.103109096 | 6.957250843 | 4.90245E-12 | FBgn0032405 |
| GB53119 | -4.126544575 | 8.831506432 | 1.87617E-07 | 0           |
| GB48443 | -4.130035222 | 6.861972986 | 5.42117E-12 | FBgn0029922 |
| GB53286 | -4.13438557  | 7.81025151  | 6.29063E-12 | FBgn0262111 |
| GB49400 | -4.145030599 | 5.58078813  | 1.25781E-10 | FBgn0262599 |
| GB52186 | -4.153454364 | 5.428034172 | 1.41736E-10 | FBgn0052808 |
| GB42580 | -4.15418035  | 5.244899895 | 3.68615E-10 | FBgn0261446 |
| GB51214 | -4.170157562 | 8.405894142 | 5.41912E-11 | FBgn0004169 |
| GB40607 | -4.179249243 | 4.260449342 | 5.82225E-05 | FBgn0037556 |
| GB49802 | -4.202158053 | 4.749772019 | 1.3083E-07  | FBgn0086906 |
| GB47947 | -4.245021994 | 6.529766459 | 1.15084E-11 | FBgn0013988 |
| GB50766 | -4.262300145 | 6.377480743 | 3.56512E-12 | FBgn0264357 |
| GB42704 | -4.280772976 | 6.922574134 | 8.58973E-12 | FBgn0037290 |
| GB42911 | -4.285194278 | 4.268906387 | 0.00087741  | FBgn0053299 |
| GB41015 | -4.29524533  | 10.42041963 | 7.72374E-15 | FBgn0031957 |
| GB42909 | -4.296998382 | 4.994634481 | 3.94549E-06 | FBgn0039027 |
| GB51653 | -4.323983691 | 9.949695784 | 1.4993E-12  | FBgn0264695 |
| GB45654 | -4.345898806 | 5.587065567 | 9.49577E-12 | FBgn0025837 |
| GB50062 | -4.384342501 | 5.203318366 | 1.53764E-10 | FBgn0037665 |
| GB51652 | -4.393546032 | 7.247760648 | 3.59566E-11 | FBgn0264695 |

|         |              |             |             |             |
|---------|--------------|-------------|-------------|-------------|
| GB55396 | -4.398977568 | 7.027490692 | 6.39544E-13 | FBgn0052694 |
| GB51698 | -4.39920812  | 12.49495934 | 4.79488E-15 | FBgn0002564 |
| GB50650 | -4.417668728 | 5.699561089 | 4.7011E-07  | FBgn0033359 |
| GB55611 | -4.426610754 | 4.511146388 | 2.6136E-06  | FBgn0010399 |
| GB48216 | -4.447949682 | 5.685230752 | 8.71233E-13 | FBgn0031692 |
| GB42358 | -4.457991824 | 6.545332714 | 2.43123E-13 | FBgn0087011 |
| GB53986 | -4.459900338 | 4.598200596 | 2.24146E-07 | FBgn0026268 |
| GB53516 | -4.468713195 | 7.707142401 | 1.07679E-13 | FBgn0043792 |
| GB51787 | -4.486097058 | 8.461177666 | 6.13982E-14 | FBgn0002772 |
| GB42596 | -4.524388257 | 6.974676099 | 1.56677E-09 | FBgn0021742 |
| GB50572 | -4.553841331 | 6.395377682 | 8.92134E-11 | FBgn0040279 |
| GB42912 | -4.559433535 | 6.270345053 | 1.04528E-09 | FBgn0053196 |
| GB43298 | -4.561352493 | 8.24852293  | 8.19303E-13 | FBgn0030539 |
| GB46386 | -4.578311889 | 4.740112494 | 5.47883E-09 | FBgn0050420 |
| GB50636 | -4.578376089 | 8.330225653 | 5.63584E-15 | FBgn0031097 |
| GB41771 | -4.580349204 | 5.770766114 | 1.3016E-12  | FBgn0024897 |
| GB49268 | -4.595960309 | 4.263065388 | 2.10088E-07 | FBgn0038837 |
| GB51407 | -4.597501477 | 6.054029553 | 1.34093E-10 | FBgn0050069 |
| GB48769 | -4.60087107  | 4.659875332 | 6.06324E-07 | FBgn0032362 |
| GB48474 | -4.622925475 | 9.074181379 | 4.32468E-16 | FBgn0035398 |
| GB42533 | -4.640865751 | 5.416941161 | 9.49577E-12 | FBgn0040233 |
| GB50828 | -4.659221767 | 6.714720104 | 6.17191E-14 | FBgn0261836 |
| GB40228 | -4.667228424 | 5.465484348 | 4.19976E-13 | 0           |
| GB54456 | -4.669655165 | 5.199546846 | 6.29063E-12 | FBgn0032462 |
| GB41383 | -4.691567102 | 4.181475379 | 3.40442E-05 | FBgn0035788 |
| GB40837 | -4.702765761 | 8.994391224 | 2.03617E-15 | FBgn0037323 |
| GB40240 | -4.772412934 | 9.755302011 | 1.36199E-14 | FBgn0002773 |
| GB48979 | -4.781229937 | 4.403630132 | 1.62527E-07 | FBgn0037323 |
| GB48860 | -4.793674967 | 5.219316263 | 6.61086E-10 | FBgn0038819 |
| GB52105 | -4.814539406 | 5.68213681  | 1.38158E-08 | FBgn0051807 |
| GB41904 | -4.840540973 | 6.299983432 | 3.16656E-14 | FBgn0030884 |
| GB43181 | -4.849804332 | 6.828745911 | 5.41282E-08 | FBgn0037992 |
| GB48161 | -4.853143579 | 8.665731234 | 9.71311E-17 | FBgn0034391 |
| GB49795 | -4.915246456 | 6.903317118 | 2.66225E-10 | FBgn0029681 |
| GB50612 | -4.945392296 | 4.305814953 | 0.000604461 | FBgn0050101 |
| GB53524 | -5.009408596 | 7.01736633  | 6.64325E-15 | FBgn0043792 |
| GB47550 | -5.020961529 | 4.591849725 | 2.2754E-08  | FBgn0052537 |
| GB55100 | -5.037654095 | 5.678492502 | 5.31068E-11 | FBgn0003016 |
| GB45860 | -5.042394798 | 5.891888242 | 7.28891E-10 | FBgn0066365 |
| GB49772 | -5.093231582 | 6.13242056  | 3.59607E-10 | FBgn0029681 |
| GB50827 | -5.09371907  | 7.432592339 | 9.95696E-16 | FBgn0051205 |
| GB48173 | -5.126409464 | 7.024740572 | 8.87691E-16 | FBgn0033158 |
| GB48861 | -5.126434021 | 6.372146309 | 1.45394E-13 | FBgn0038819 |
| GB42763 | -5.15219759  | 7.047287941 | 8.85323E-16 | FBgn0023388 |
| GB53288 | -5.16117053  | 4.572146997 | 5.82817E-06 | FBgn0040211 |
| GB53517 | -5.168778212 | 6.053449995 | 6.8703E-14  | FBgn0035935 |
| GB44561 | -5.202946852 | 5.848810631 | 3.33097E-13 | FBgn0039075 |
| GB48107 | -5.226869736 | 6.61848971  | 1.36199E-14 | FBgn0017561 |
| GB53110 | -5.231349229 | 12.8707348  | 1.33521E-19 | FBgn0034289 |
| GB43769 | -5.251332107 | 6.005617828 | 3.82098E-05 | FBgn0037411 |
| GB53120 | -5.258607944 | 6.117281959 | 1.34192E-13 | FBgn0013733 |
| GB54963 | -5.288952108 | 4.702027602 | 7.38335E-07 | FBgn0039335 |
| GB45764 | -5.323483863 | 7.304549464 | 2.4212E-17  | FBgn0004117 |
| GB40447 | -5.331158072 | 7.553781991 | 3.63496E-12 | FBgn0033869 |
| GB51441 | -5.383502436 | 10.89502157 | 5.0489E-21  | FBgn0019960 |
| GB50562 | -5.387185933 | 7.405980626 | 3.93468E-06 | FBgn0037411 |

|         |              |              |             |             |
|---------|--------------|--------------|-------------|-------------|
| GB53935 | -5.413069086 | 4.043393827  | 5.36496E-06 | FBgn0011476 |
| GB50613 | -5.419681068 | 10.492555556 | 1.33789E-16 | FBgn0050101 |
| GB53112 | -5.428345938 | 5.766254309  | 1.12752E-13 | FBgn0034289 |
| GB42910 | -5.43731013  | 4.757646001  | 2.35868E-05 | FBgn0053299 |
| GB52052 | -5.438315129 | 7.392983209  | 1.40832E-14 | FBgn0029690 |
| GB45850 | -5.446486661 | 9.096473943  | 4.85148E-15 | FBgn0035636 |
| GB48174 | -5.4485501   | 8.723268326  | 6.85682E-17 | FBgn0033158 |
| GB50875 | -5.463818656 | 6.820607706  | 3.05615E-14 | FBgn0053126 |
| GB42702 | -5.477908322 | 9.248887724  | 1.1941E-20  | FBgn0037288 |
| GB47752 | -5.515043291 | 6.534164177  | 3.71505E-14 | FBgn0001992 |
| GB46973 | -5.518363451 | 7.574785907  | 4.34143E-18 | FBgn0263038 |
| GB49021 | -5.562206042 | 9.777492894  | 6.36414E-20 | FBgn0034030 |
| GB54489 | -5.566229543 | 5.111492264  | 7.3639E-13  | FBgn0052829 |
| GB54791 | -5.578623085 | 4.279545686  | 8.17152E-08 | FBgn0003089 |
| GB47118 | -5.617979587 | 8.317954969  | 8.76706E-20 | FBgn0038439 |
| GB49689 | -5.65175419  | 7.604236631  | 4.76932E-19 | FBgn0004577 |
| GB50442 | -5.658512342 | 5.205383155  | 4.54202E-14 | FBgn0039480 |
| GB40659 | -5.669542012 | 4.378644984  | 9.43215E-09 | FBgn0043043 |
| GB50449 | -5.674011106 | 6.858139047  | 1.14124E-15 | 0           |
| GB47946 | -5.67929931  | 4.43118507   | 1.35079E-09 | FBgn0013988 |
| GB42597 | -5.737129889 | 12.09356337  | 5.44984E-23 | FBgn0032538 |
| GB46591 | -5.741803772 | 11.43232851  | 2.67613E-22 | FBgn0032538 |
| GB42888 | -5.776241908 | 9.32207576   | 4.66981E-22 | FBgn0053196 |
| GB46585 | -5.800148373 | 11.8424213   | 4.66981E-22 | FBgn0032538 |
| GB50451 | -5.80726974  | 10.68343613  | 4.35406E-20 | FBgn0053196 |
| GB55614 | -5.839313135 | 7.015867608  | 1.19816E-17 | FBgn0011225 |
| GB45957 | -5.85113678  | 7.454507235  | 2.85306E-18 | FBgn0034157 |
| GB40624 | -5.85765917  | 8.143762399  | 5.35733E-21 | FBgn0259247 |
| GB46518 | -5.85800219  | 8.335852717  | 3.44452E-10 | 0           |
| GB49394 | -5.891907014 | 7.725687819  | 4.35406E-20 | FBgn0259247 |
| GB53113 | -5.896334073 | 7.610868771  | 2.71541E-17 | FBgn0040496 |
| GB42582 | -5.906404172 | 6.694968304  | 1.06213E-16 | FBgn0035280 |
| GB45763 | -5.914022382 | 6.449705193  | 8.04592E-15 | FBgn0004117 |
| GB44399 | -5.917663422 | 10.72414426  | 7.91223E-20 | FBgn0050101 |
| GB54970 | -6.122837235 | 9.406342098  | 2.67613E-22 | FBgn0035089 |
| GB52104 | -6.169279346 | 4.76782576   | 1.71935E-10 | FBgn0039479 |
| GB53525 | -6.171543806 | 6.045173189  | 1.69069E-15 | FBgn0035641 |
| GB43877 | -6.297896662 | 5.631954329  | 1.8211E-12  | FBgn0034883 |
| GB55612 | -6.317779852 | 7.895072307  | 1.00707E-21 | FBgn0263216 |
| GB47903 | -6.423742269 | 7.171670631  | 6.32601E-20 | FBgn0036110 |
| GB50876 | -6.622986705 | 5.058142695  | 2.34858E-09 | FBgn0053126 |
| GB46399 | -6.662085923 | 7.774255526  | 7.67769E-20 | FBgn0032256 |
| GB48794 | -6.752198095 | 10.88586947  | 2.33167E-27 | FBgn0004034 |
| GB46394 | -6.868363921 | 7.050956778  | 2.43504E-21 | FBgn0035091 |
| GB51819 | -7.807856572 | 3.518344203  | 1.34466E-05 | FBgn0030590 |
| GB46417 | -7.977066023 | 3.476835302  | 0.000211095 | FBgn0037662 |
| GB50611 | -8.024187021 | 3.469908441  | 0.000697375 | FBgn0050101 |
| GB50887 | -8.142800669 | 3.856928975  | 1.7978E-07  | FBgn0029961 |
| GB47927 | -8.265531204 | 3.861301851  | 2.36401E-06 | 0           |
| GB50577 | -8.426190415 | 3.915174307  | 4.89528E-06 | FBgn0037427 |
| GB42581 | -8.449393087 | 4.11138689   | 1.37911E-08 | FBgn0035873 |
| GB42643 | -8.622691746 | 3.998422497  | 0.00012058  | FBgn0039200 |
