# Supplementary material for: The Iflaviruses Sacbrood virus and Deformed wing virus evoke different transcriptional responses in the honeybee which may facilitate their horizontal or vertical transmission
Source: PubMed Central journal article supplement (PMC4727977; doi:10.7717/peerj.1591), 2016-01-18
Supplement: peerj-04-1591-s004.pdf [file peerj-04-1591-s004.pdf]

Table S4

**Larval feeding NGS experiments. Gene ontology (GO) terms associated with the genes upregulated in Contrast 3 (high DWV vs. control) and downregulated in Contrast 5 (high SBV+DWV vs. high DWV).**

| <b>Biological Process</b>                                         |               |                |                         |                             |
|-------------------------------------------------------------------|---------------|----------------|-------------------------|-----------------------------|
| <b>GO Term</b>                                                    | <b>Aspect</b> | <b>P-value</b> | <b>Sample frequency</b> | <b>Background frequency</b> |
| GO:0046034 ATP metabolic process                                  | P             | 4.21E-07       | 9/60 (15.0%)            | 108/14580 (0.7%)            |
| GO:0009205 purine ribonucleoside triphosphate metabolic process   | P             | 5.84E-07       | 9/60 (15.0%)            | 112/14580 (0.8%)            |
| GO:0009144 purine nucleoside triphosphate metabolic process       | P             | 5.84E-07       | 9/60 (15.0%)            | 112/14580 (0.8%)            |
| GO:0009199 ribonucleoside triphosphate metabolic process          | P             | 6.85E-07       | 9/60 (15.0%)            | 114/14580 (0.8%)            |
| GO:0009141 nucleoside triphosphate metabolic process              | P             | 8.00E-07       | 9/60 (15.0%)            | 116/14580 (0.8%)            |
| GO:0006412 translation                                            | P             | 1.10E-06       | 18/60 (30.0%)           | 787/14580 (5.4%)            |
| GO:0009126 purine nucleoside monophosphate metabolic process      | P             | 1.17E-06       | 9/60 (15.0%)            | 121/14580 (0.8%)            |
| GO:0009167 purine ribonucleoside monophosphate metabolic process  | P             | 1.17E-06       | 9/60 (15.0%)            | 121/14580 (0.8%)            |
| GO:0009161 ribonucleoside monophosphate metabolic process         | P             | 1.80E-06       | 9/60 (15.0%)            | 127/14580 (0.9%)            |
| GO:0009123 nucleoside monophosphate metabolic process             | P             | 1.93E-06       | 9/60 (15.0%)            | 128/14580 (0.9%)            |
| GO:0046128 purine ribonucleoside metabolic process                | P             | 4.26E-06       | 9/60 (15.0%)            | 140/14580 (1.0%)            |
| GO:0042278 purine nucleoside metabolic process                    | P             | 4.26E-06       | 9/60 (15.0%)            | 140/14580 (1.0%)            |
| GO:0009119 ribonucleoside metabolic process                       | P             | 7.82E-06       | 9/60 (15.0%)            | 150/14580 (1.0%)            |
| GO:0042775 mitochondrial ATP synthesis coupled electron transport | P             | 1.11E-05       | 7/60 (11.7%)            | 70/14580 (0.5%)             |
| GO:0009116 nucleoside metabolic process                           | P             | 1.38E-05       | 9/60 (15.0%)            | 160/14580 (1.1%)            |
| GO:0042773 ATP synthesis coupled electron transport               | P             | 1.65E-05       | 7/60 (11.7%)            | 74/14580 (0.5%)             |
| GO:1901657 glycosyl compound metabolic process                    | P             | 1.71E-05       | 9/60 (15.0%)            | 164/14580 (1.1%)            |
| GO:0009150 purine ribonucleotide metabolic process                | P             | 2.21E-05       | 9/60 (15.0%)            | 169/14580 (1.2%)            |
| GO:0044237 cellular metabolic process                             | P             | 2.60E-05       | 40/60 (66.7%)           | 4646/14580 (31.9%)          |
| GO:0006163 purine nucleotide metabolic process                    | P             | 2.71E-05       | 9/60 (15.0%)            | 173/14580 (1.2%)            |
| GO:0006119 oxidative phosphorylation                              | P             | 2.86E-05       | 7/60 (11.7%)            | 80/14580 (0.5%)             |
| GO:0009259 ribonucleotide metabolic process                       | P             | 3.00E-05       | 9/60 (15.0%)            | 175/14580 (1.2%)            |
| GO:0022904 respiratory electron transport chain                   | P             | 3.12E-05       | 7/60 (11.7%)            | 81/14580 (0.6%)             |
| GO:0019693 ribose phosphate metabolic process                     | P             | 4.41E-05       | 9/60 (15.0%)            | 183/14580 (1.3%)            |
| GO:0022900 electron transport chain                               | P             | 5.14E-05       | 7/60 (11.7%)            | 87/14580 (0.6%)             |
| GO:0072521 purine-containing compound metabolic process           | P             | 6.67E-05       | 9/60 (15.0%)            | 192/14580 (1.3%)            |
| GO:0071704 organic substance metabolic process                    | P             | 4.01E-04       | 41/60 (68.3%)           | 5310/14580 (36.4%)          |
| GO:0009117 nucleotide metabolic process                           | P             | 4.13E-04       | 9/60 (15.0%)            | 238/14580 (1.6%)            |
| GO:0006753 nucleoside phosphate metabolic process                 | P             | 4.59E-04       | 9/60 (15.0%)            | 241/14580 (1.7%)            |
| GO:0045333 cellular respiration                                   | P             | 4.98E-04       | 7/60 (11.7%)            | 121/14580 (0.8%)            |
| GO:0015980 energy derivation by oxidation of organic compounds    | P             | 9.93E-04       | 7/60 (11.7%)            | 134/14580 (0.9%)            |
| GO:0055086 nucleobase-containing small molecule metabolic process | P             | 1.34E-03       | 9/60 (15.0%)            | 274/14580 (1.9%)            |
| GO:0044238 primary metabolic process                              | P             | 1.91E-03       | 38/60 (63.3%)           | 4903/14580 (33.6%)          |
| GO:0019637 organophosphate metabolic process                      | P             | 2.14E-03       | 10/60 (16.7%)           | 374/14580 (2.6%)            |
| GO:0044249 cellular biosynthetic process                          | P             | 2.96E-03       | 25/60 (41.7%)           | 2418/14580 (16.6%)          |
| GO:0044267 cellular protein metabolic process                     | P             | 3.01E-03       | 23/60 (38.3%)           | 2086/14580 (14.3%)          |
| GO:1901576 organic substance biosynthetic process                 | P             | 3.44E-03       | 25/60 (41.7%)           | 2438/14580 (16.7%)          |
| GO:0008152 metabolic process                                      | P             | 3.92E-03       | 42/60 (70.0%)           | 5968/14580 (40.9%)          |
| GO:0034645 cellular macromolecule biosynthetic process            | P             | 5.35E-03       | 22/60 (36.7%)           | 1993/14580 (13.7%)          |
| GO:0009058 biosynthetic process                                   | P             | 5.35E-03       | 25/60 (41.7%)           | 2497/14580 (17.1%)          |
| GO:0006091 generation of precursor metabolites and energy         | P             | 5.44E-03       | 7/60 (11.7%)            | 173/14580 (1.2%)            |
| GO:0009059 macromolecule biosynthetic process                     | P             | 5.76E-03       | 22/60 (36.7%)           | 2002/14580 (13.7%)          |
| GO:0006120 mitochondrial electron transport, NADH to ubiquinone   | P             | 8.93E-03       | 4/60 (6.7%)             | 34/14580 (0.2%)             |

**Cellular Component**

| <b>GO Term</b>                                          | <b>Aspect</b> | <b>P-value</b> | <b>Sample frequency</b> | <b>Background frequency</b> |
|---------------------------------------------------------|---------------|----------------|-------------------------|-----------------------------|
| GO:0044429 mitochondrial part                           | C             | 1.38E-17       | 23/60 (38.3%)           | 419/14580 (2.9%)            |
| GO:0044391 ribosomal subunit                            | C             | 2.25E-16       | 17/60 (28.3%)           | 176/14580 (1.2%)            |
| GO:0005739 mitochondrion                                | C             | 1.31E-14       | 24/60 (40.0%)           | 644/14580 (4.4%)            |
| GO:0032991 macromolecular complex                       | C             | 1.97E-14       | 42/60 (70.0%)           | 2838/14580 (19.5%)          |
| GO:0044446 intracellular organelle part                 | C             | 3.14E-14       | 40/60 (66.7%)           | 2544/14580 (17.4%)          |
| GO:0044422 organelle part                               | C             | 5.37E-14       | 40/60 (66.7%)           | 2582/14580 (17.7%)          |
| GO:0005761 mitochondrial ribosome                       | C             | 2.91E-13       | 12/60 (20.0%)           | 80/14580 (0.5%)             |
| GO:0000313 organellar ribosome                          | C             | 2.91E-13       | 12/60 (20.0%)           | 80/14580 (0.5%)             |
| GO:0005840 ribosome                                     | C             | 7.27E-13       | 17/60 (28.3%)           | 283/14580 (1.9%)            |
| GO:0000314 organellar small ribosomal subunit           | C             | 3.84E-12       | 9/60 (15.0%)            | 32/14580 (0.2%)             |
| GO:0005763 mitochondrial small ribosomal subunit        | C             | 3.84E-12       | 9/60 (15.0%)            | 32/14580 (0.2%)             |
| GO:0044444 cytoplasmic part                             | C             | 3.92E-11       | 36/60 (60.0%)           | 2439/14580 (16.7%)          |
| GO:0005759 mitochondrial matrix                         | C             | 1.46E-09       | 12/60 (20.0%)           | 160/14580 (1.1%)            |
| GO:0030529 ribonucleoprotein complex                    | C             | 3.14E-09       | 19/60 (31.7%)           | 633/14580 (4.3%)            |
| GO:0043229 intracellular organelle                      | C             | 4.03E-09       | 44/60 (73.3%)           | 4369/14580 (30.0%)          |
| GO:0043226 organelle                                    | C             | 6.40E-09       | 44/60 (73.3%)           | 4423/14580 (30.3%)          |
| GO:0005737 cytoplasm                                    | C             | 1.26E-08       | 37/60 (61.7%)           | 3114/14580 (21.4%)          |
| GO:0044455 mitochondrial membrane part                  | C             | 1.27E-08       | 11/60 (18.3%)           | 146/14580 (1.0%)            |
| GO:0015935 small ribosomal subunit                      | C             | 1.33E-08       | 9/60 (15.0%)            | 74/14580 (0.5%)             |
| GO:0015934 large ribosomal subunit                      | C             | 1.47E-08       | 10/60 (16.7%)           | 108/14580 (0.7%)            |
| GO:0044424 intracellular part                           | C             | 9.02E-08       | 47/60 (78.3%)           | 5457/14580 (37.4%)          |
| GO:0005622 intracellular                                | C             | 1.70E-07       | 47/60 (78.3%)           | 5545/14580 (38.0%)          |
| GO:0005743 mitochondrial inner membrane                 | C             | 2.47E-07       | 11/60 (18.3%)           | 192/14580 (1.3%)            |
| GO:0043228 non-membrane-bounded organelle               | C             | 4.00E-07       | 26/60 (43.3%)           | 1685/14580 (11.6%)          |
| GO:0043232 intracellular non-membrane-bounded organelle | C             | 4.00E-07       | 26/60 (43.3%)           | 1685/14580 (11.6%)          |
| GO:0019866 organelle inner membrane                     | C             | 4.03E-07       | 11/60 (18.3%)           | 201/14580 (1.4%)            |
| GO:0043231 intracellular membrane-bounded organelle     | C             | 8.22E-07       | 37/60 (61.7%)           | 3569/14580 (24.5%)          |
| GO:0043227 membrane-bounded organelle                   | C             | 8.57E-07       | 37/60 (61.7%)           | 3574/14580 (24.5%)          |
| GO:0070469 respiratory chain                            | C             | 2.06E-06       | 8/60 (13.3%)            | 88/14580 (0.6%)             |
| GO:0005746 mitochondrial respiratory chain              | C             | 2.06E-06       | 8/60 (13.3%)            | 88/14580 (0.6%)             |
| GO:0031966 mitochondrial membrane                       | C             | 4.75E-06       | 11/60 (18.3%)           | 254/14580 (1.7%)            |
| GO:0005740 mitochondrial envelope                       | C             | 6.83E-06       | 11/60 (18.3%)           | 263/14580 (1.8%)            |
| GO:0043233 organelle lumen                              | C             | 8.49E-06       | 17/60 (28.3%)           | 788/14580 (5.4%)            |
| GO:0070013 intracellular organelle lumen                | C             | 8.49E-06       | 17/60 (28.3%)           | 788/14580 (5.4%)            |
| GO:0031974 membrane-enclosed lumen                      | C             | 1.01E-05       | 17/60 (28.3%)           | 797/14580 (5.5%)            |
| GO:0044464 cell part                                    | C             | 3.00E-05       | 47/60 (78.3%)           | 6340/14580 (43.5%)          |
| GO:0005623 cell                                         | C             | 3.00E-05       | 47/60 (78.3%)           | 6340/14580 (43.5%)          |
| GO:0031090 organelle membrane                           | C             | 1.03E-04       | 13/60 (21.7%)           | 514/14580 (3.5%)            |
| GO:0031967 organelle envelope                           | C             | 1.89E-04       | 11/60 (18.3%)           | 364/14580 (2.5%)            |
| GO:0031975 envelope                                     | C             | 1.94E-04       | 11/60 (18.3%)           | 365/14580 (2.5%)            |
| GO:1990204 oxidoreductase complex                       | C             | 2.77E-04       | 7/60 (11.7%)            | 111/14580 (0.8%)            |
| GO:0005747 mitochondrial respiratory chain complex I    | C             | 1.35E-03       | 5/60 (8.3%)             | 49/14580 (0.3%)             |
| GO:0030964 NADH dehydrogenase complex                   | C             | 1.35E-03       | 5/60 (8.3%)             | 49/14580 (0.3%)             |
| GO:0045271 respiratory chain complex I                  | C             | 1.35E-03       | 5/60 (8.3%)             | 49/14580 (0.3%)             |
| GO:0005762 mitochondrial large ribosomal subunit        | C             | 1.35E-03       | 5/60 (8.3%)             | 49/14580 (0.3%)             |
| GO:0000315 organellar large ribosomal subunit           | C             | 1.35E-03       | 5/60 (8.3%)             | 49/14580 (0.3%)             |
| GO:0022625 cytosolic large ribosomal subunit            | C             | 3.43E-03       | 5/60 (8.3%)             | 59/14580 (0.4%)             |
| GO:0043234 protein complex                              | C             | 5.88E-03       | 23/60 (38.3%)           | 2169/14580 (14.9%)          |
| <b>Molecular Function</b>                               |               |                |                         |                             |
| <b>GO Term</b>                                          | <b>Aspect</b> | <b>P-value</b> | <b>Sample frequency</b> | <b>Background frequency</b> |
| GO:0003735 structural constituent of ribosome           | F             | 3.75E-13       | 17/60 (28.3%)           | 272/14580 (1.9%)            |
| GO:0005198 structural molecule activity                 | F             | 2.06E-08       | 18/60 (30.0%)           | 616/14580 (4.2%)            |
